# Supplementary material for: Common Genetic Polymorphisms Influence Blood Biomarker Measurements in COPD
Source: PubMed Central journal article supplement (PMC4988780; doi:10.1371/journal.pgen.1006011), 2016-08-17

**Supplemental Figure S3.** Manhattan plots, q-q plots, and LocusZoom plots of pQTL findings for all analytes where significant pQTLs were identified. LocusZoom plots show a 90 kb window (center) or a 500 kb window (right). On the Manhattan plots, the red line is the significant threshold after correction for multiple comparisons. For all LocusZoom plots, the top pQTL SNP is indicated. Red boxes in the LocusZoom plots show the location of the analyte gene (not all plots show this location but local pQTLs will have a box in one or both plots; for distant pQTLs, no red box will be present in either plot). Analyte gene location is shown with red arrow in Manhattan plots.

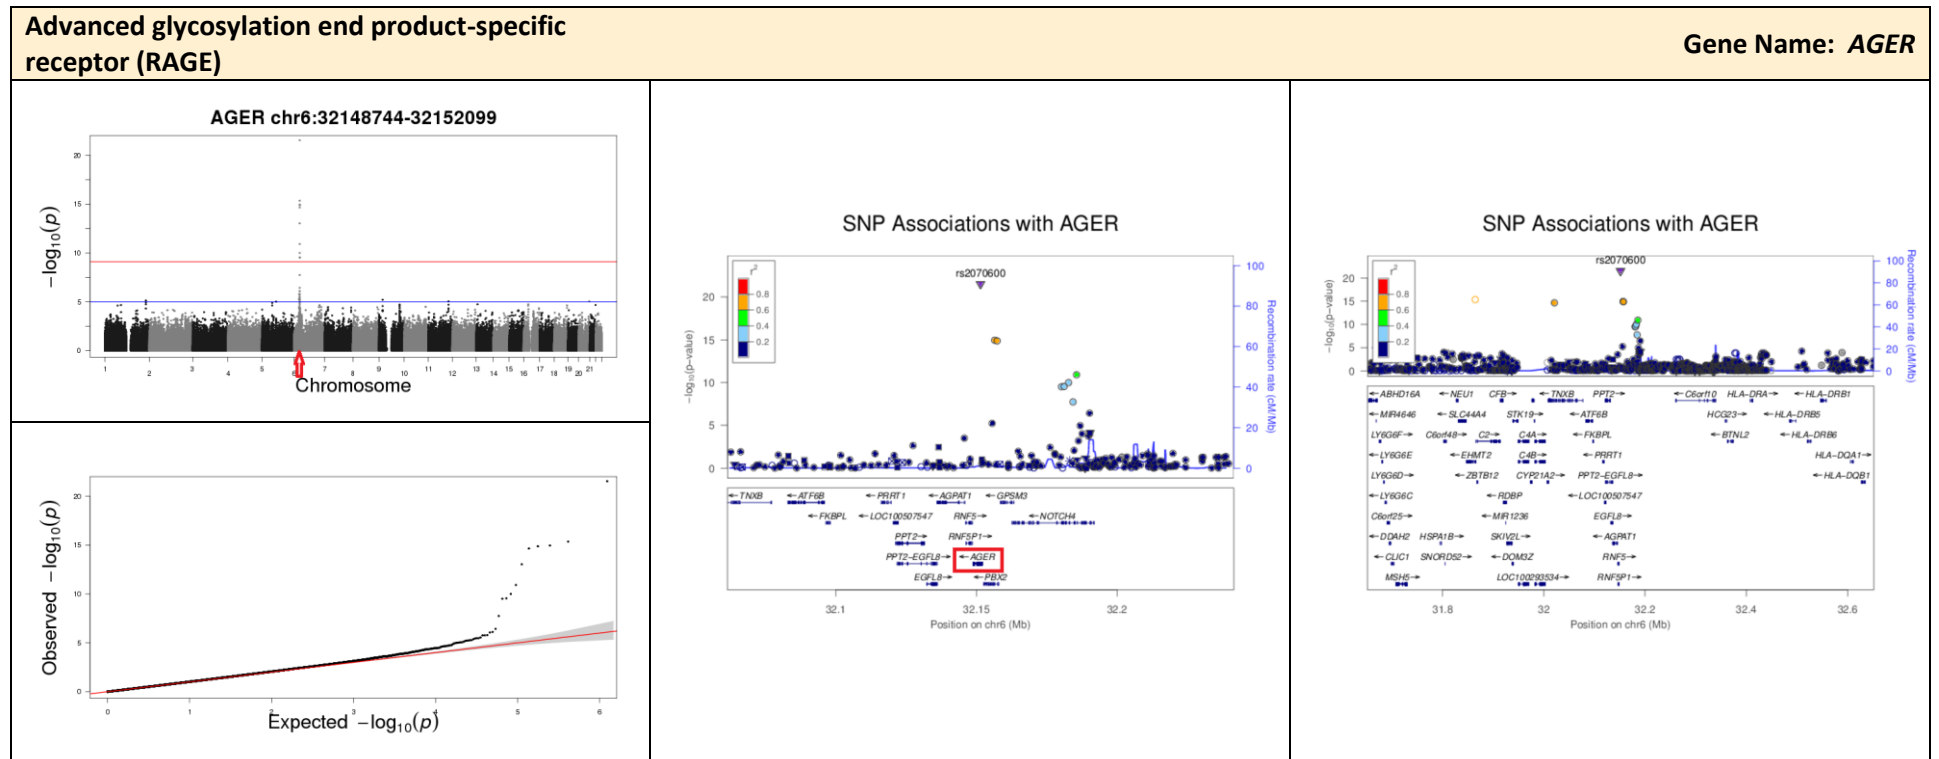

**Apolipoprotein A-IV (Apo A-IV)**

**Gene Name: APOA4**

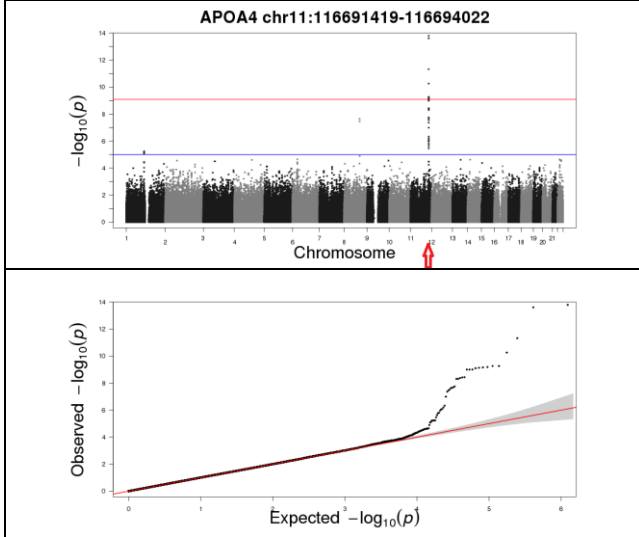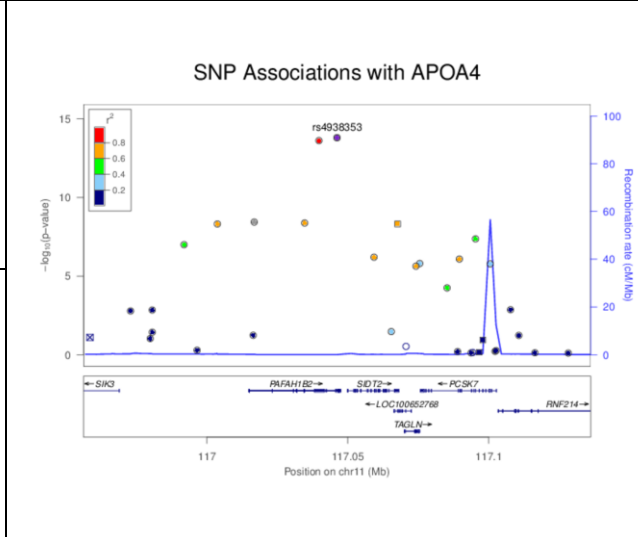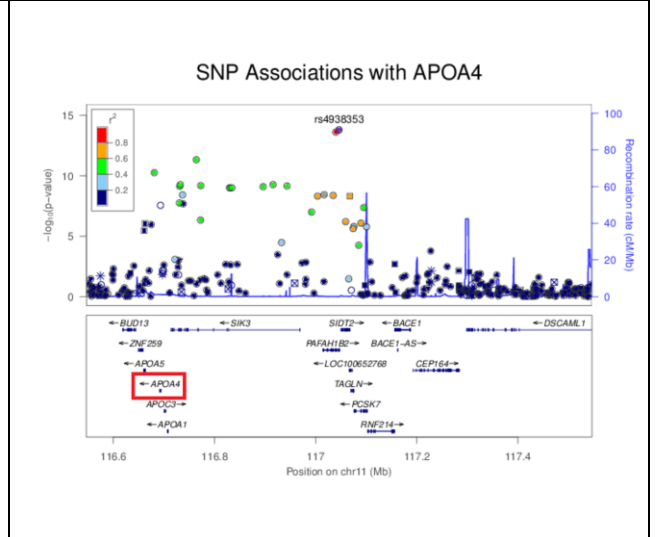

**Complement Component 3**

**Gene Name: C3**

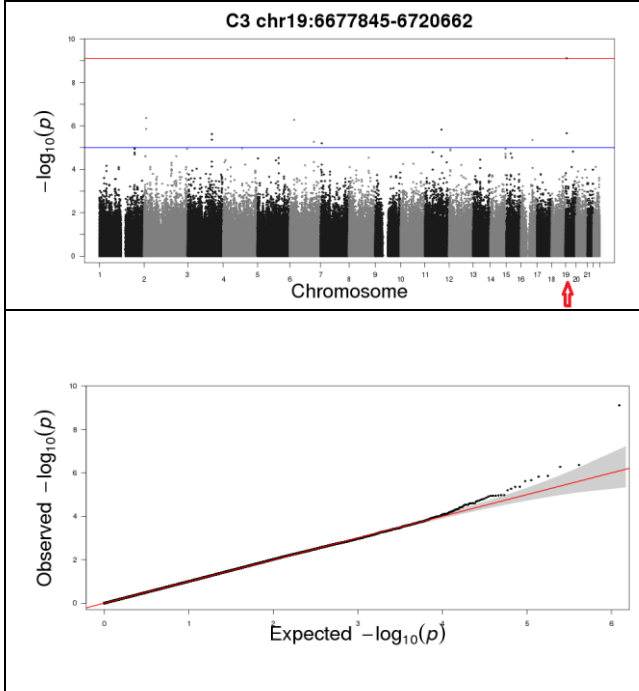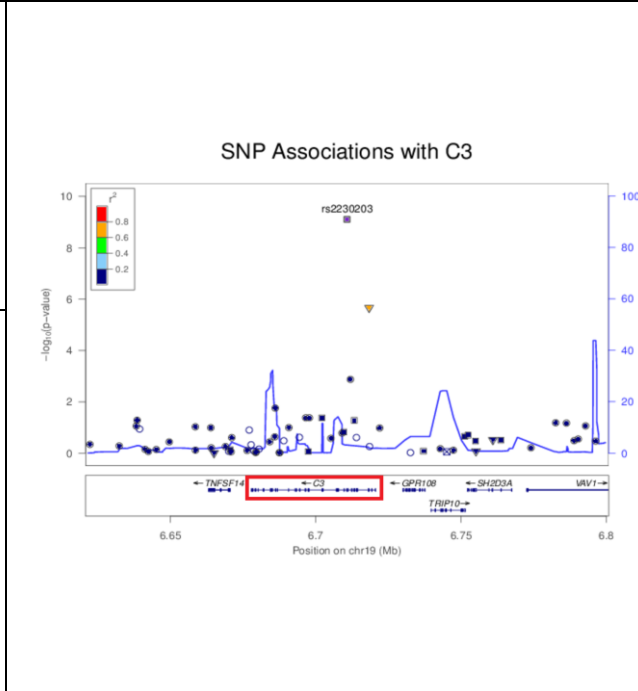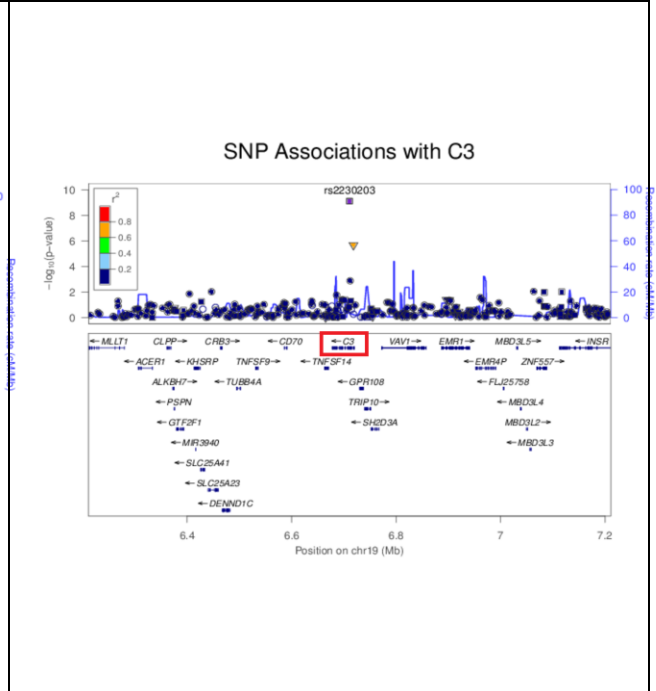

**Chemokine (C-C motif) ligand 16 (pulmonary and activation-regulated)**

Gene Name: *CCL16*

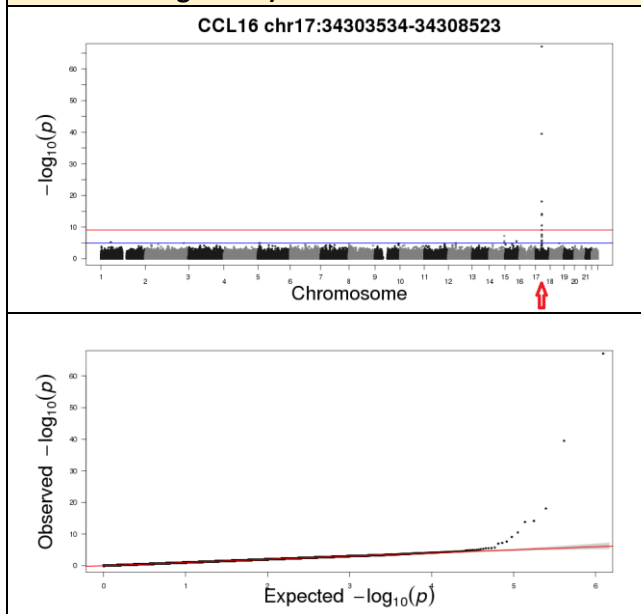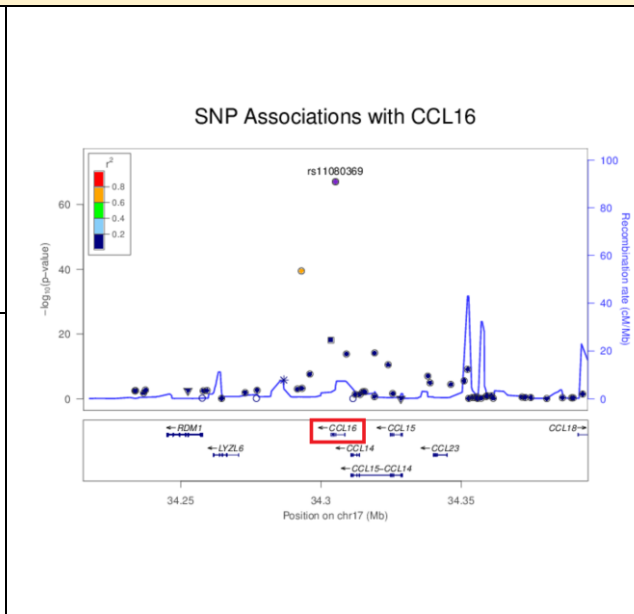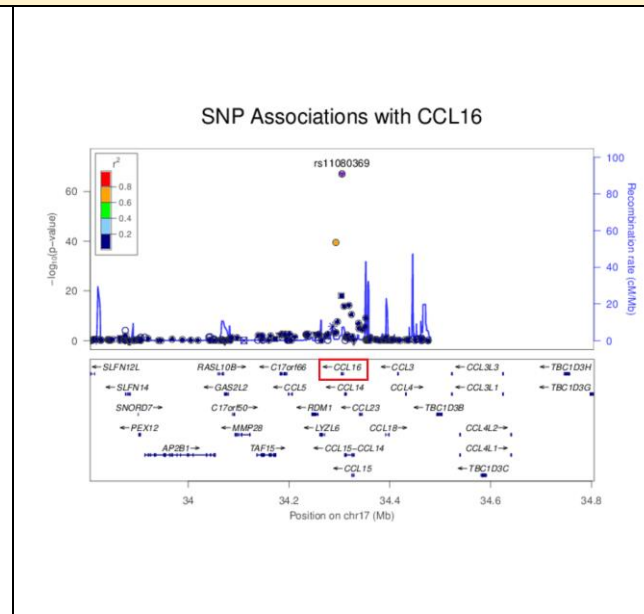

**C-C motif chemokine 18**

Gene Name: *CCL18*

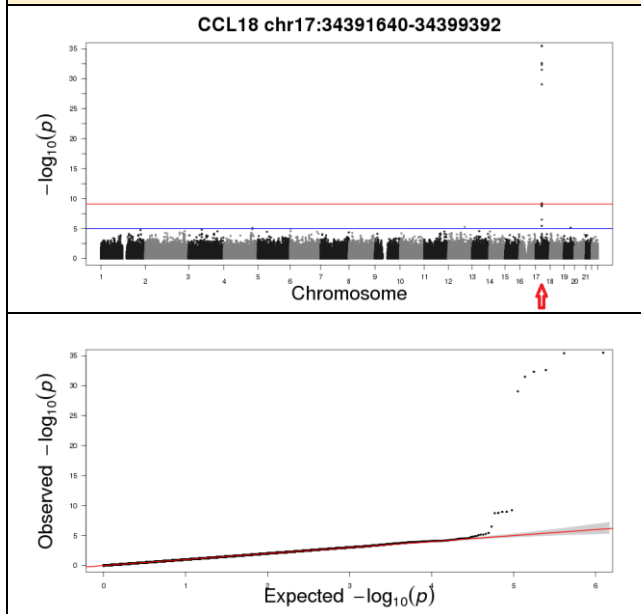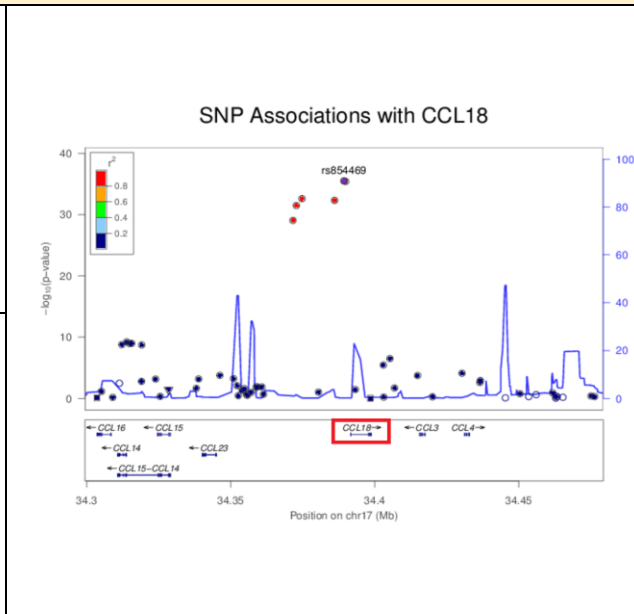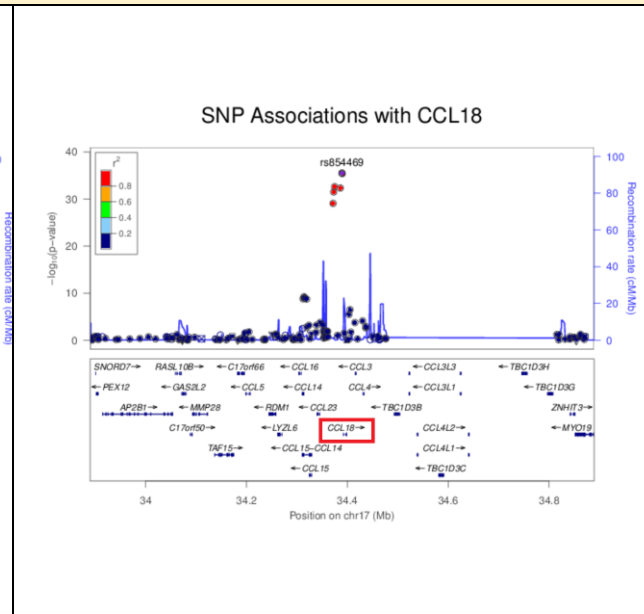

**Chemokine (C-C motif) ligand 23 (Myeloid Progenitor Inhibitory Factor 1; MPIF-1)**

**Gene Name: CCL23**

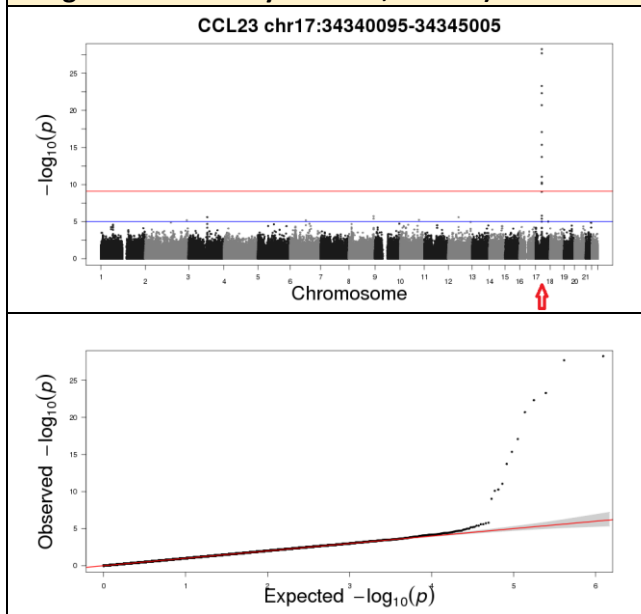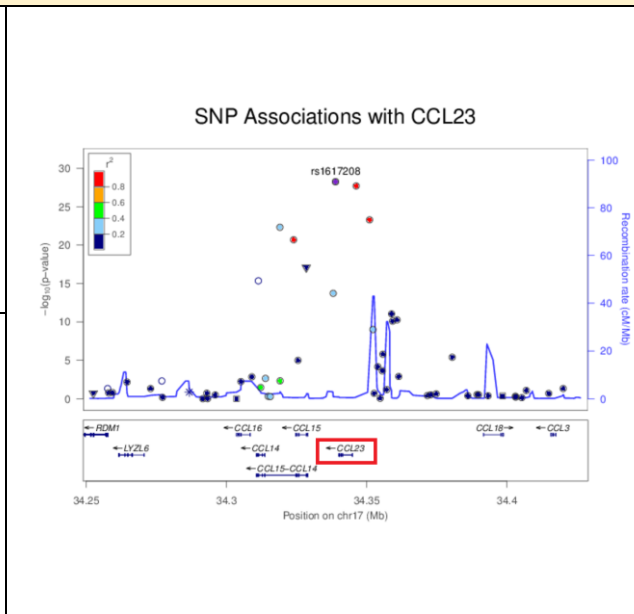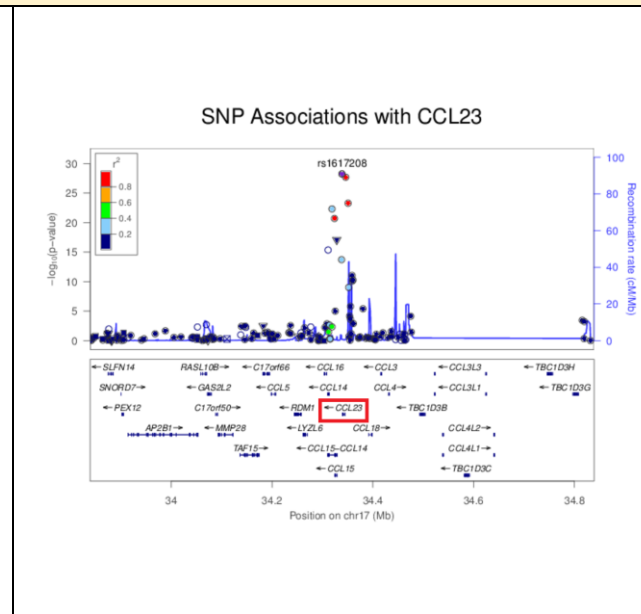

**Chemokine (C-C motif) ligand 24 (Eotaxin-2)**

**Gene Name: CCL24**

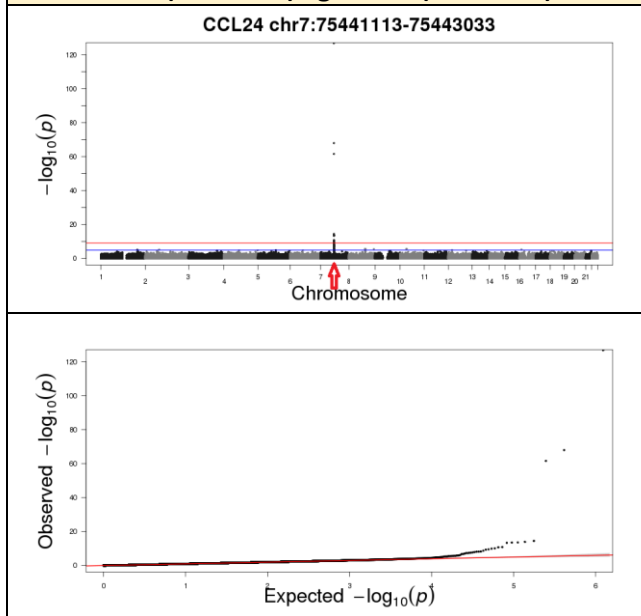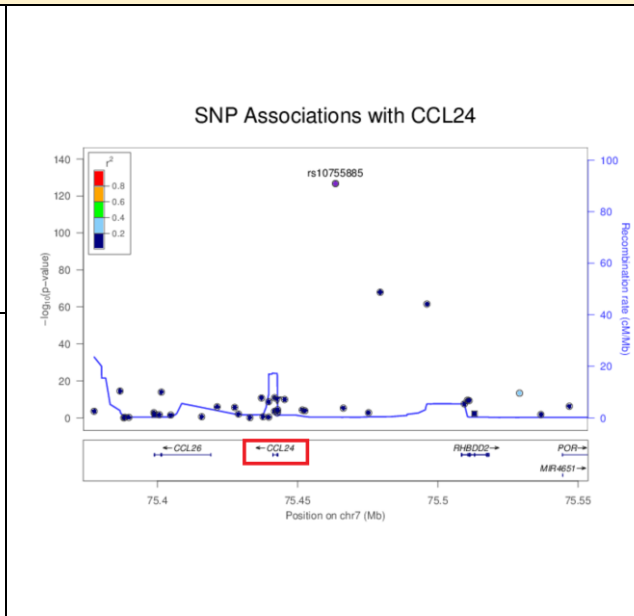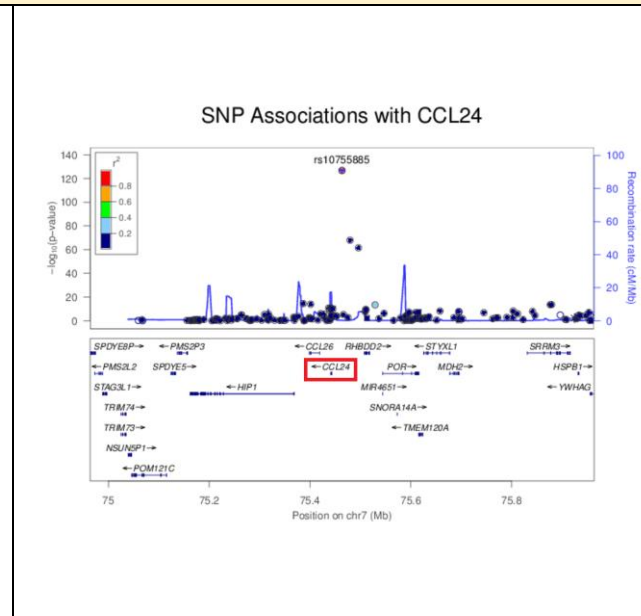

**Chemokine (C-C motif) ligand 4 (Macrophage Inflammatory Protein-1  $\beta$ ; MIP-1  $\beta$ )**

**Gene Name: CCL4**

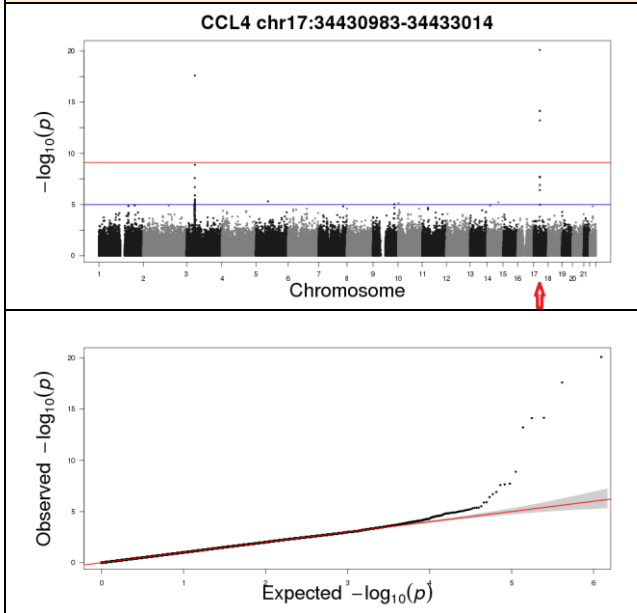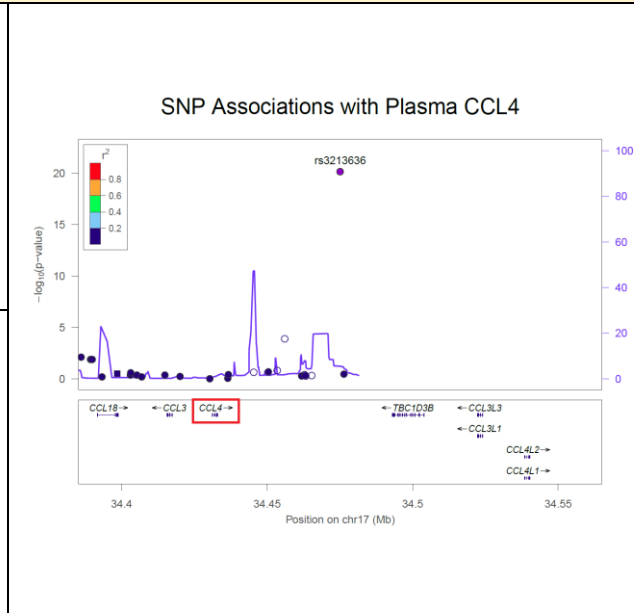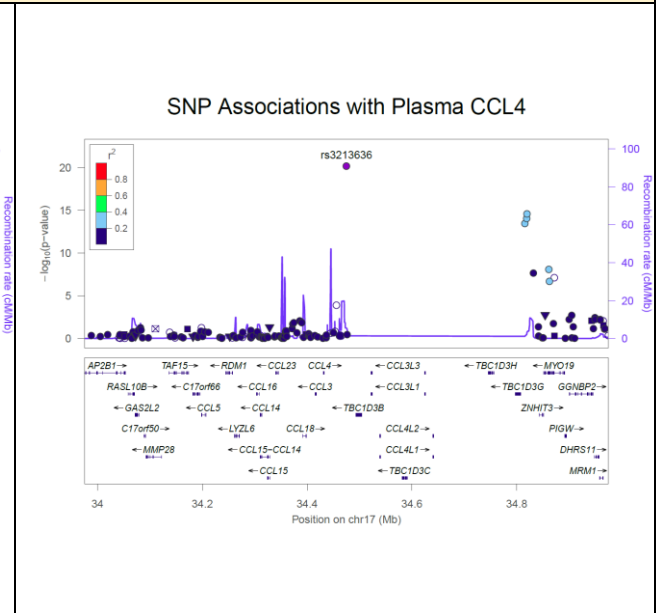

**Chemokine (C-C motif) ligand 8 (Monocyte Chemotactic Protein 2; MCP-2)**

**Gene Name: CCL8**

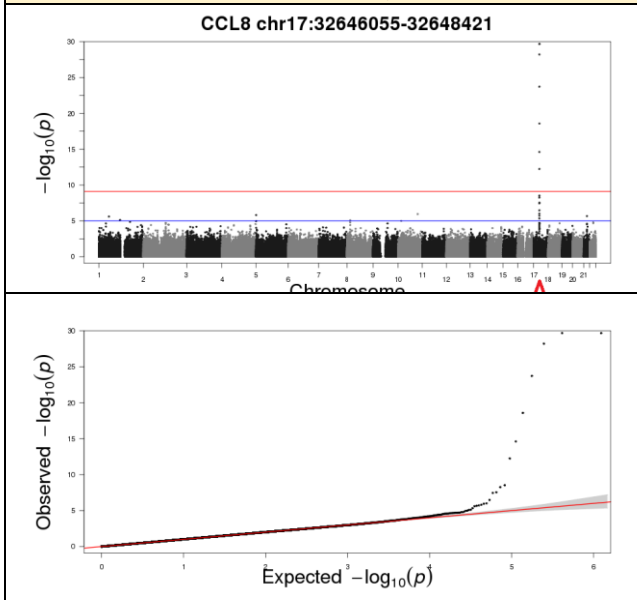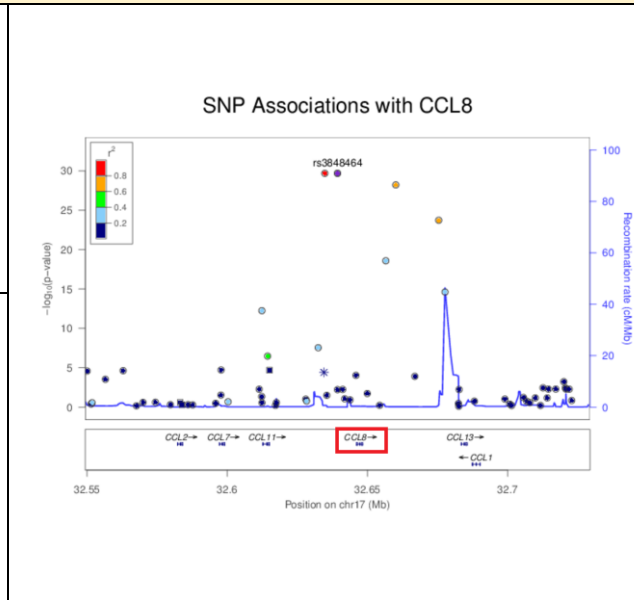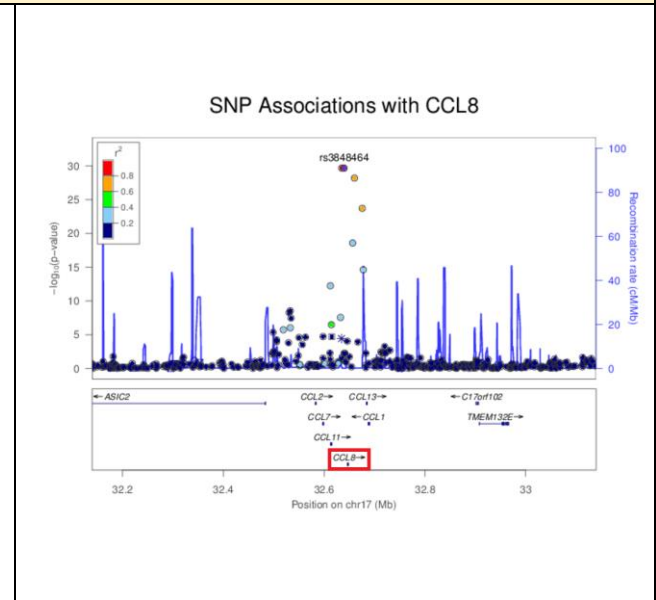

**Cadherin-1 [E-cadherin (epithelial)]**

**Gene Name: *CDH1***

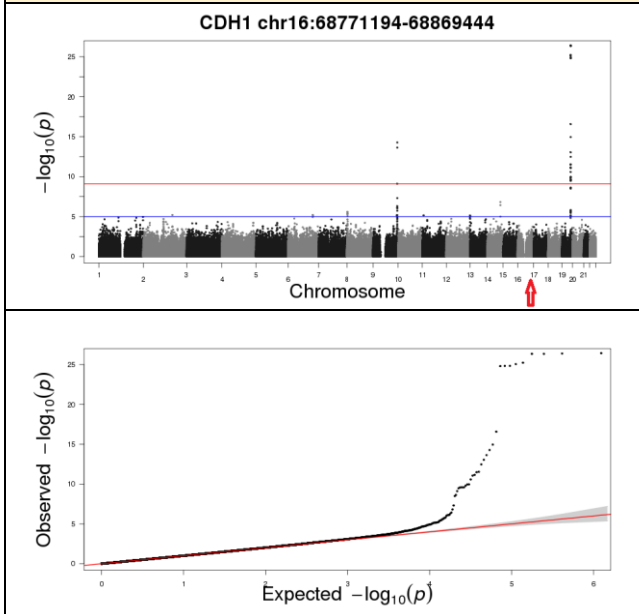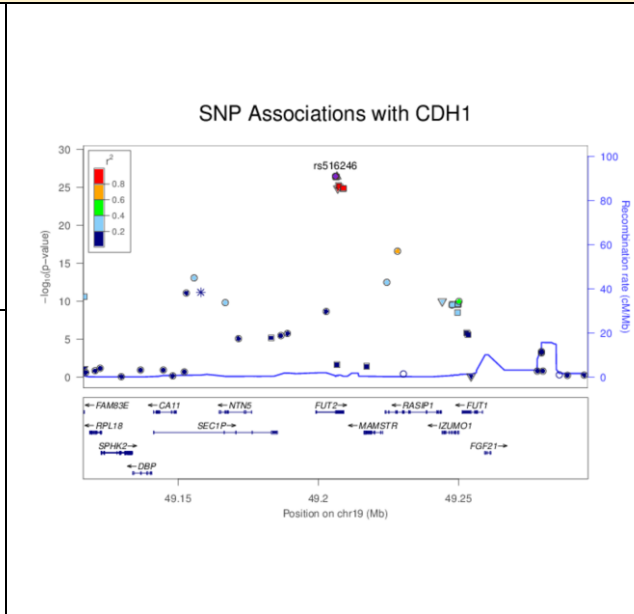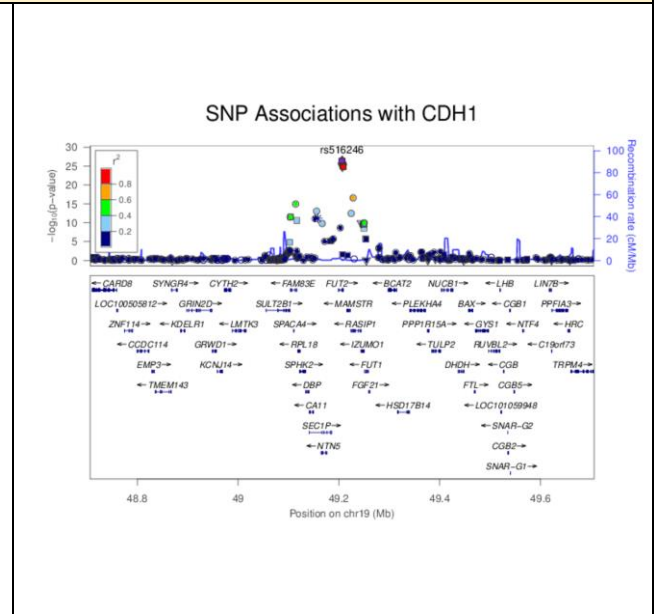

**Cystatin-B**

**Gene Name: *CSTB***

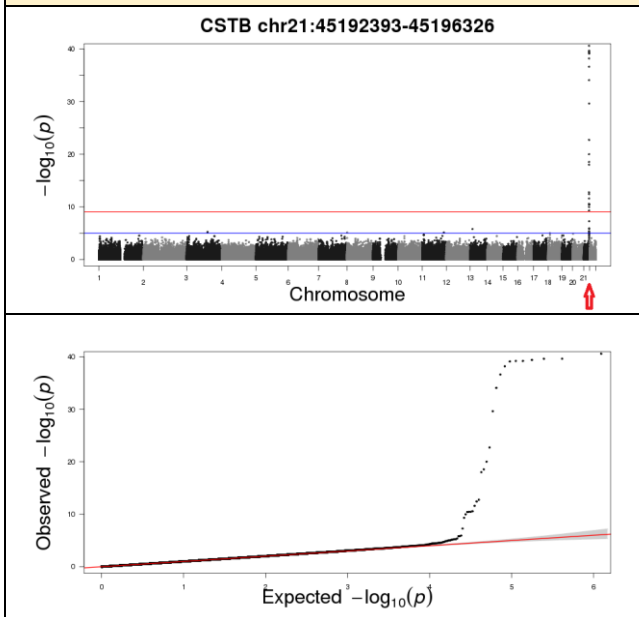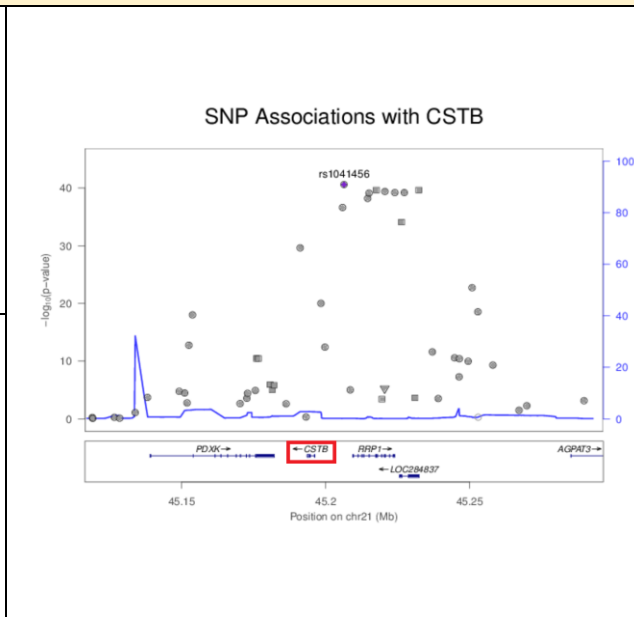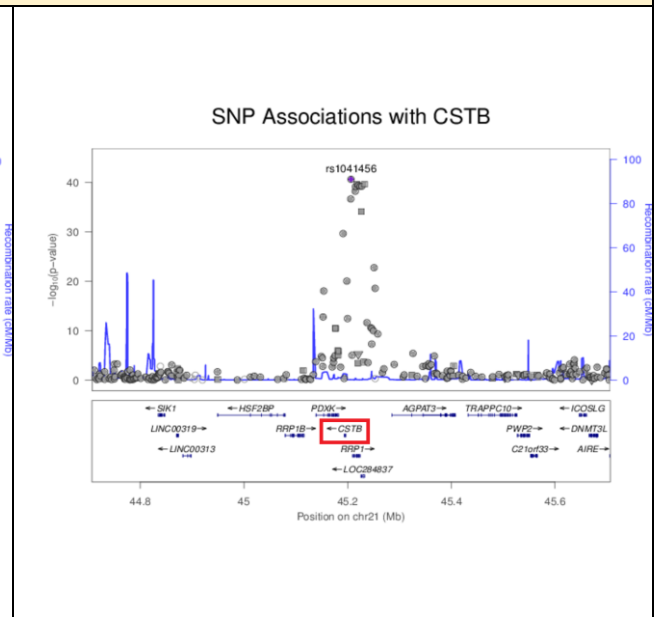

**C-X-C motif chemokine 5 (Epithelial-Derived Neutrophil-Activating Protein 78; ENA-78)**

**Gene Name: CXCL5**

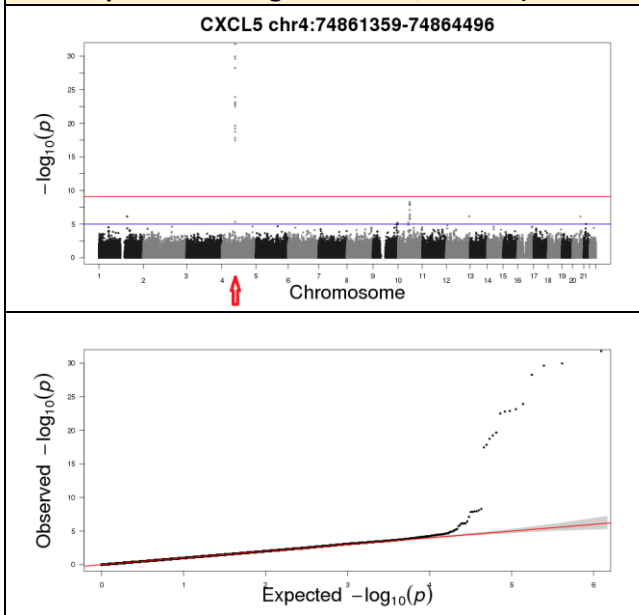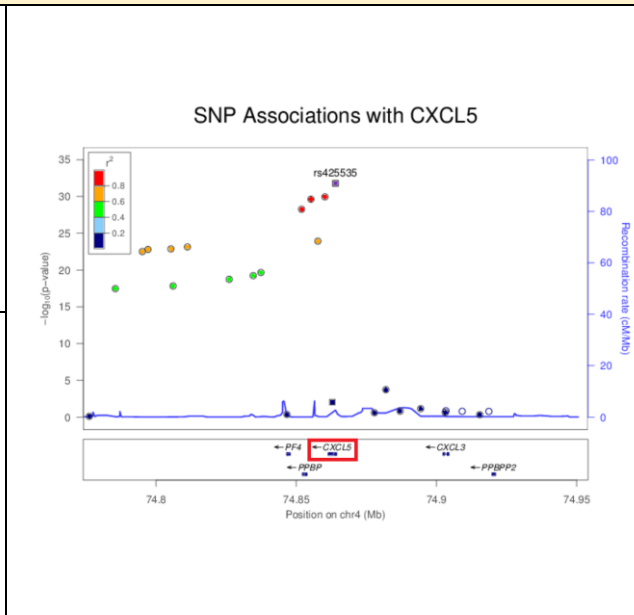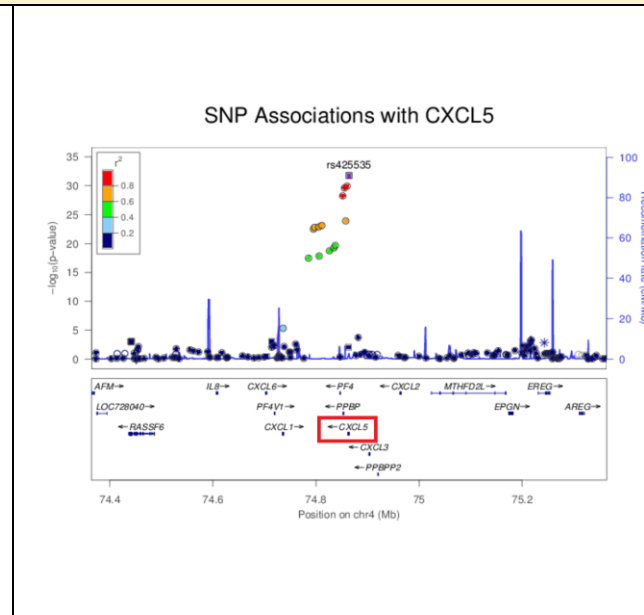

**Coagulation Factor VII**

**Gene Name: F7**

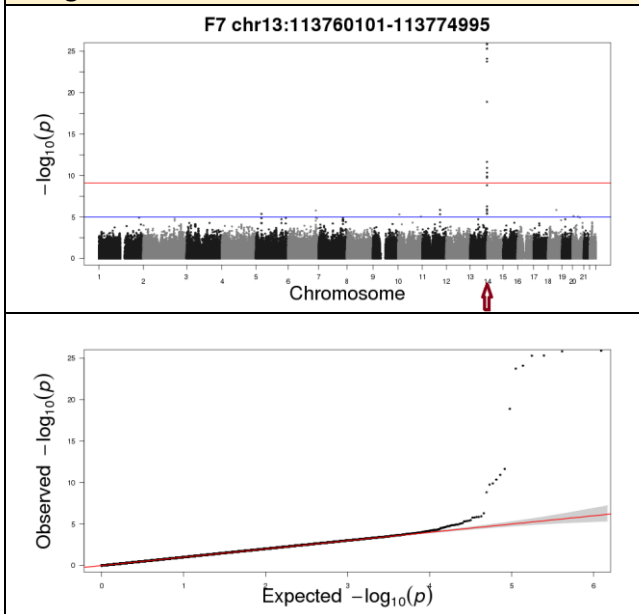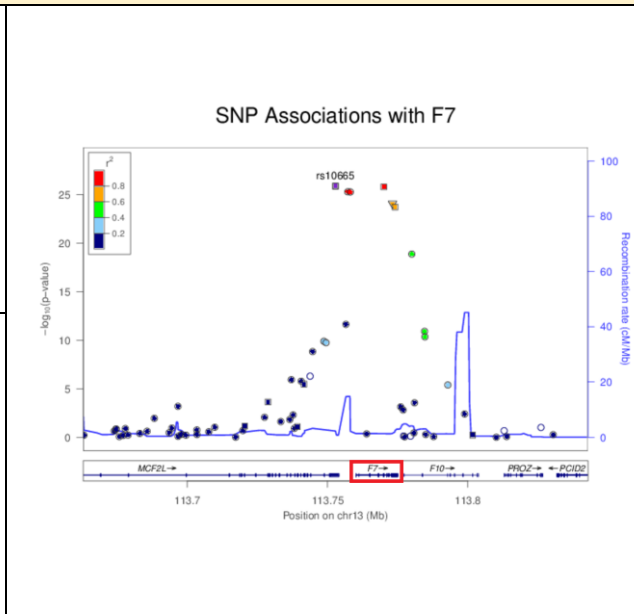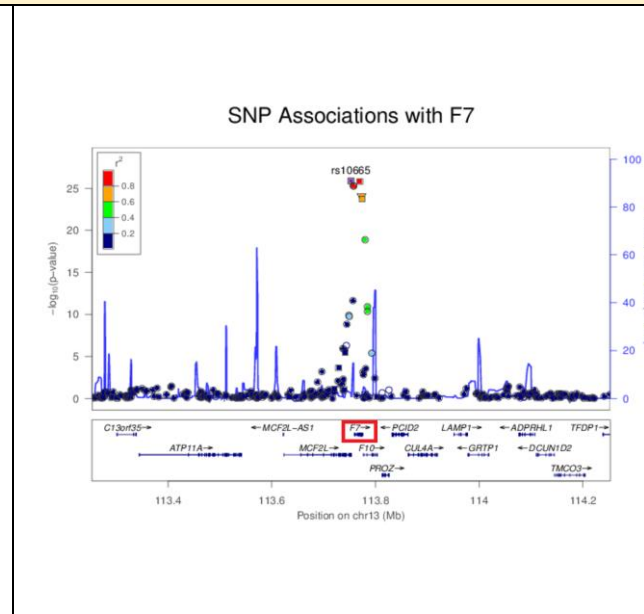

**Tumor necrosis factor receptor superfamily member 6 (FASLG Receptor; CD95)**

Gene Name: *FAS*

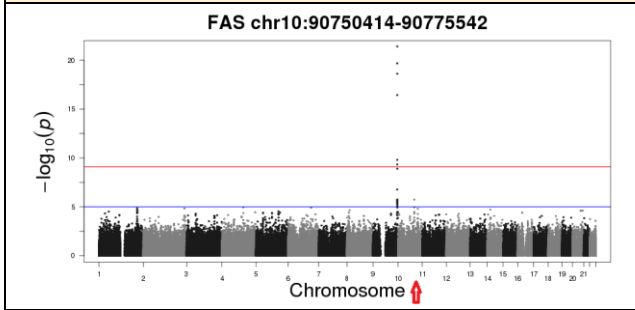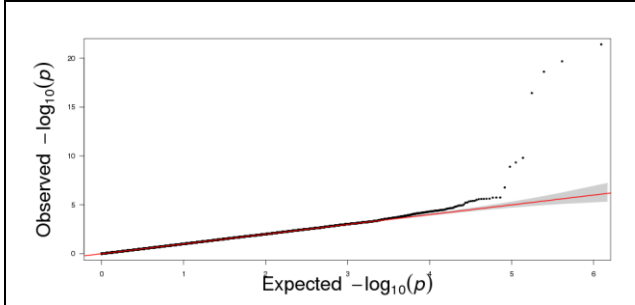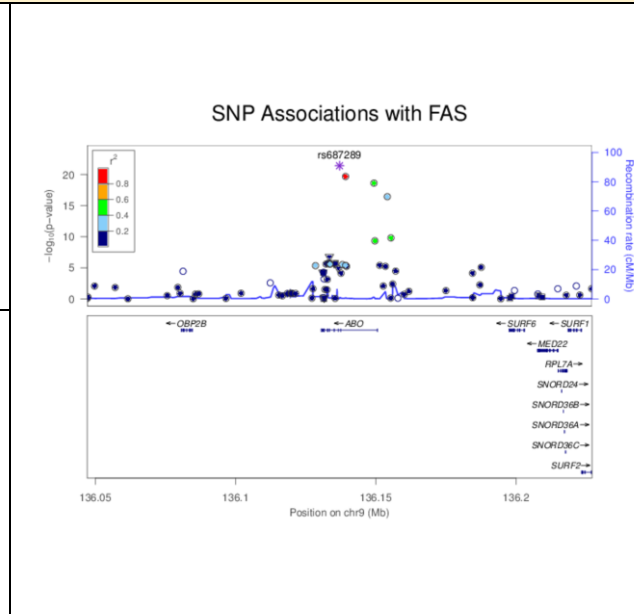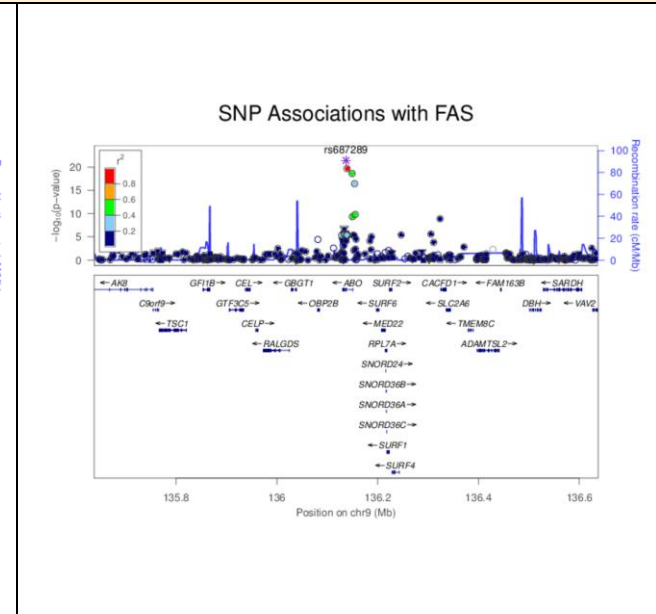

**Vitamin D-Binding Protein**

Gene Name: *GC*

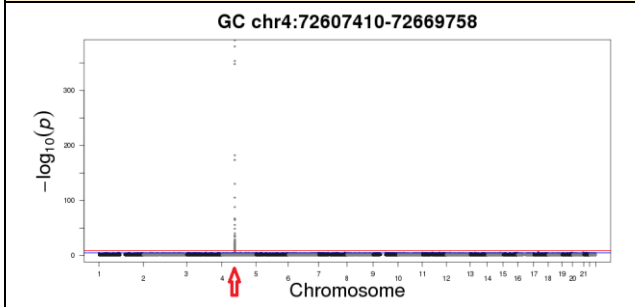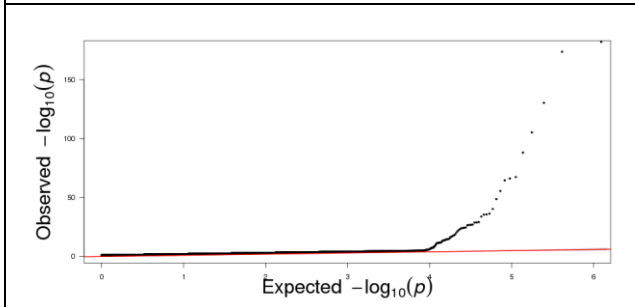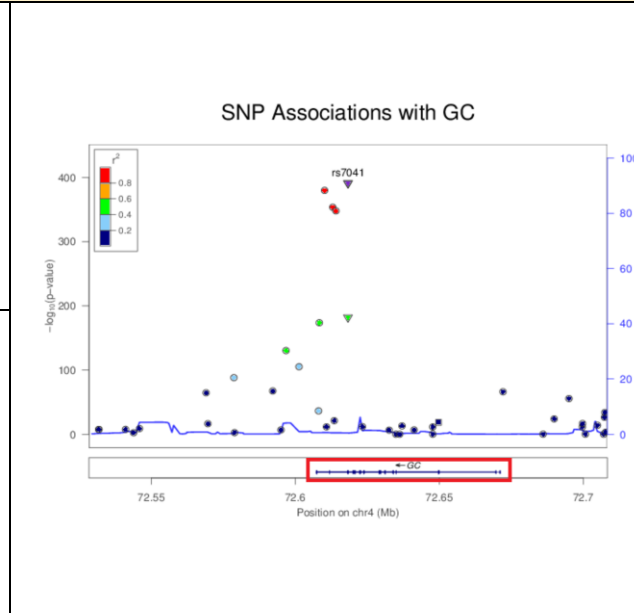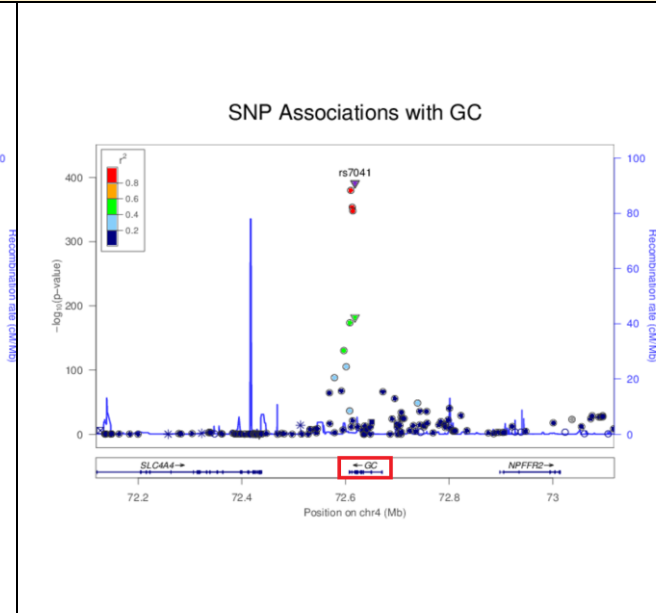



Hepatocyte Growth Factor

Gene Name: *HGF*

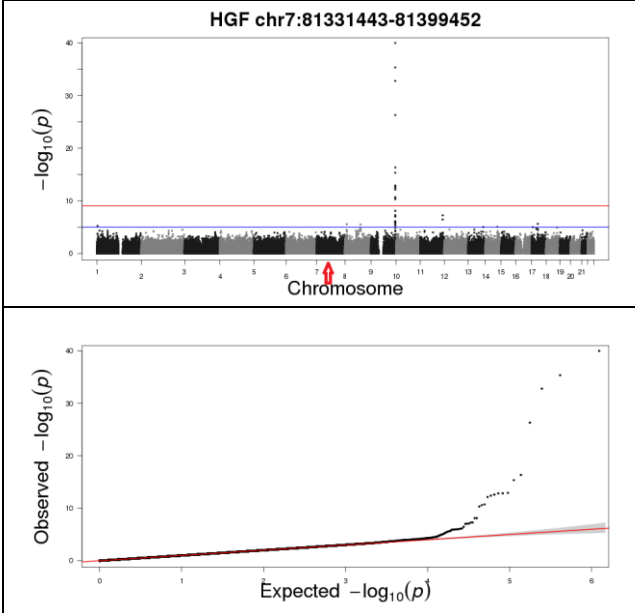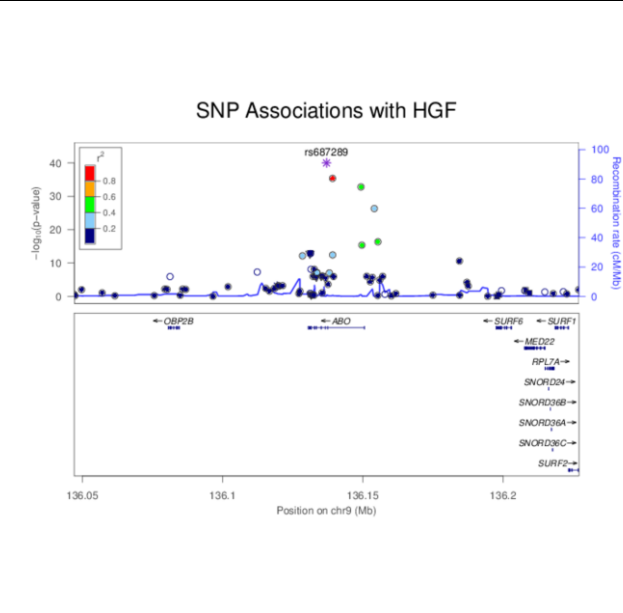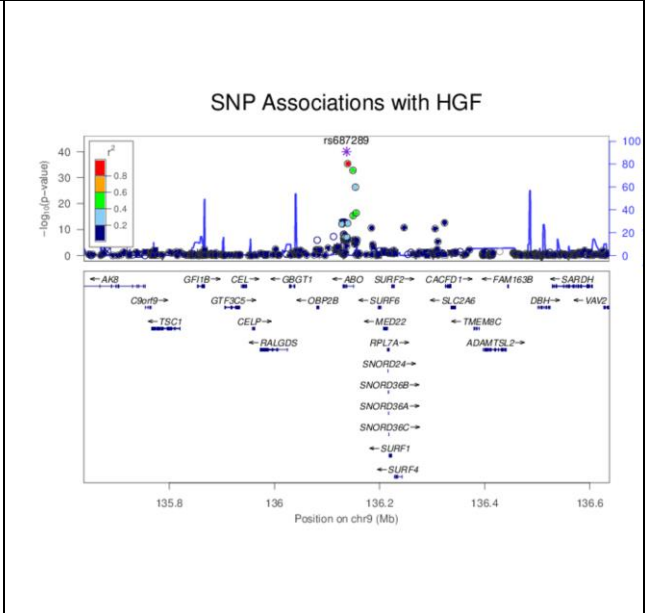

Haptoglobin

Gene Name: *HP*

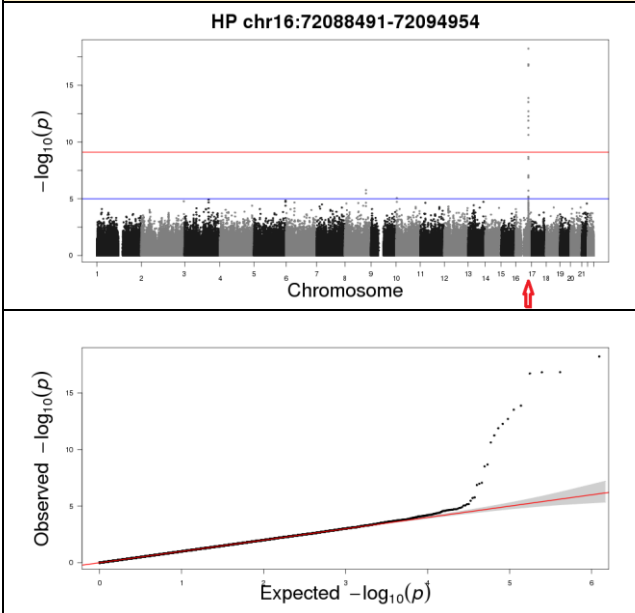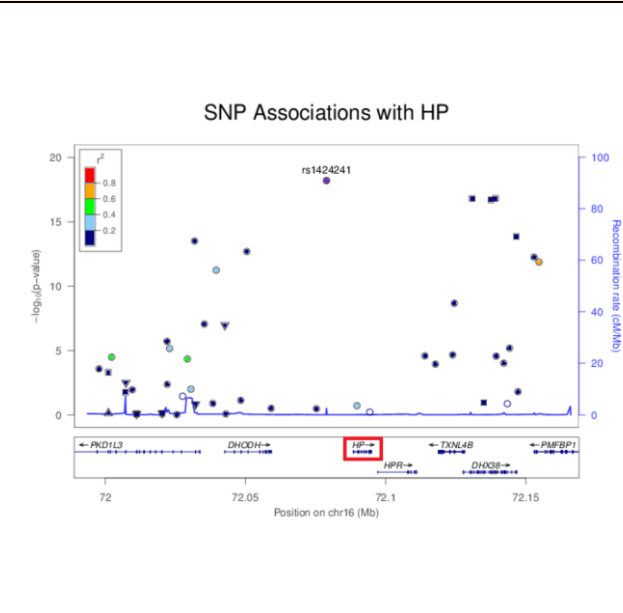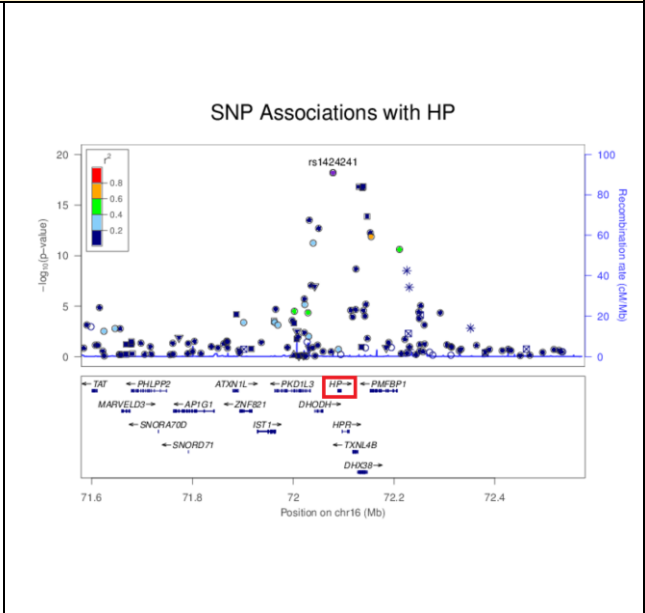

**Interleukin-12 Subunit p40 (IL-12p40)**

**Gene Name: *IL12B***

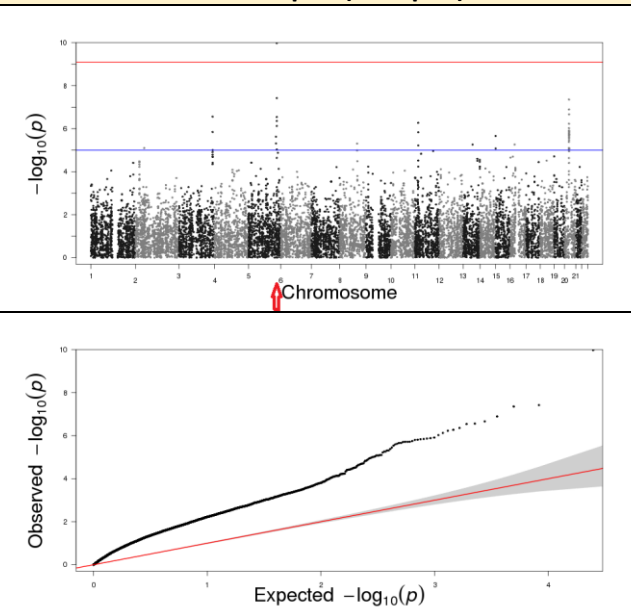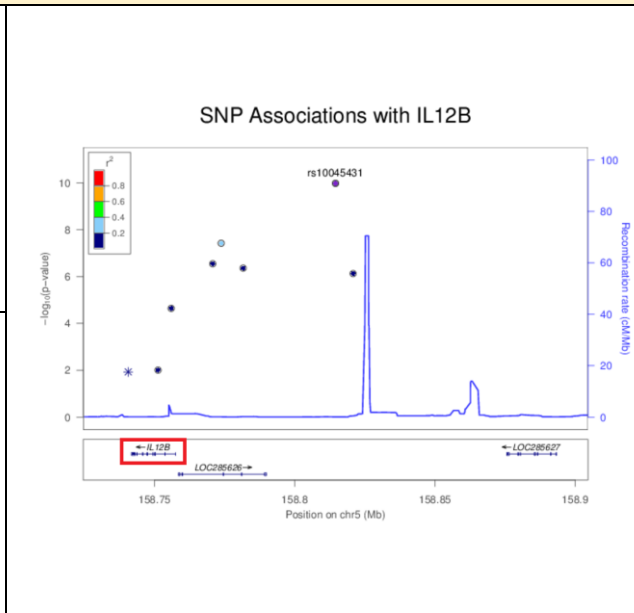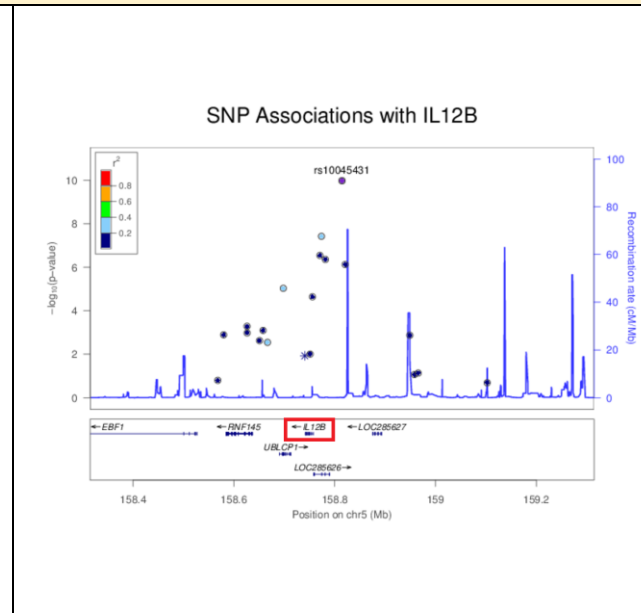

**Interleukin-16**

**Gene Name: *IL16***

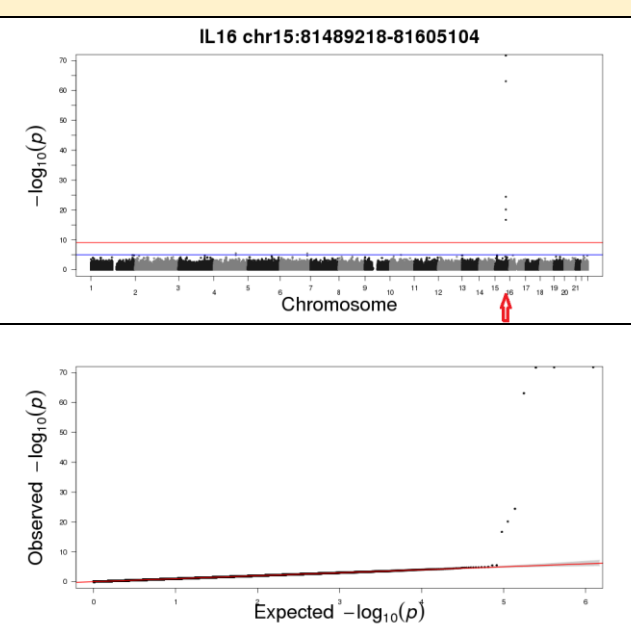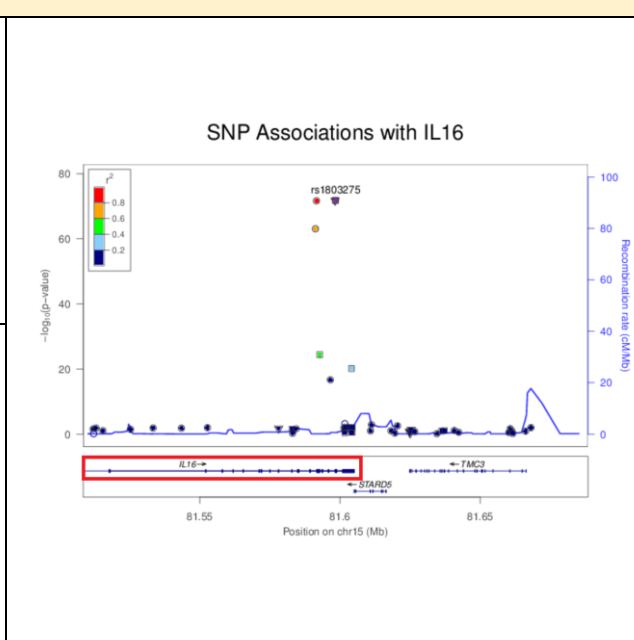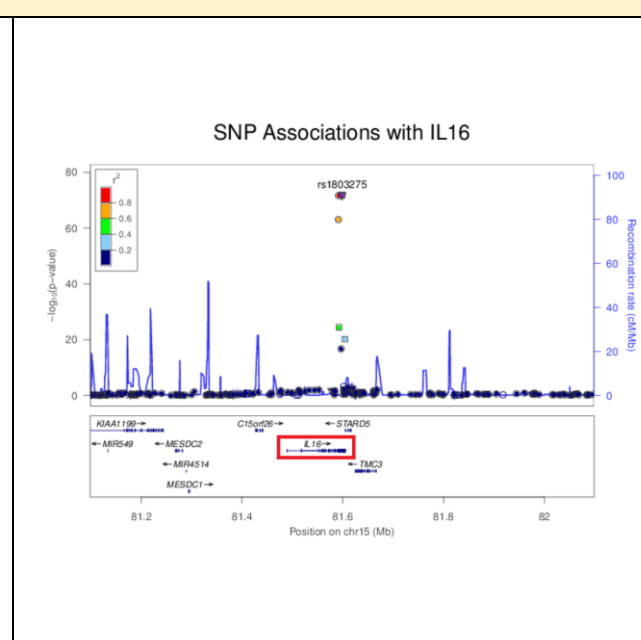

**Interleukin-18**

**Gene Name: *IL18***

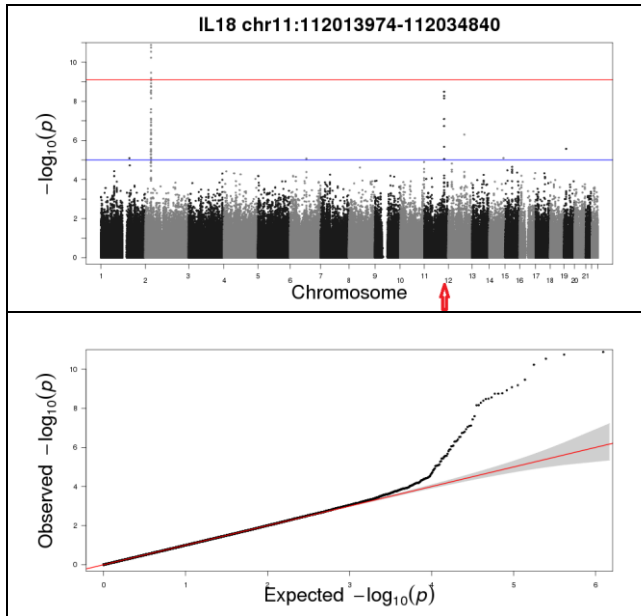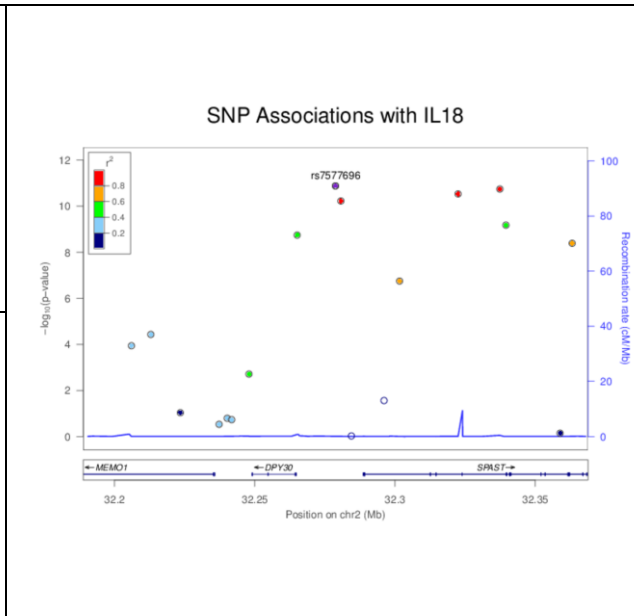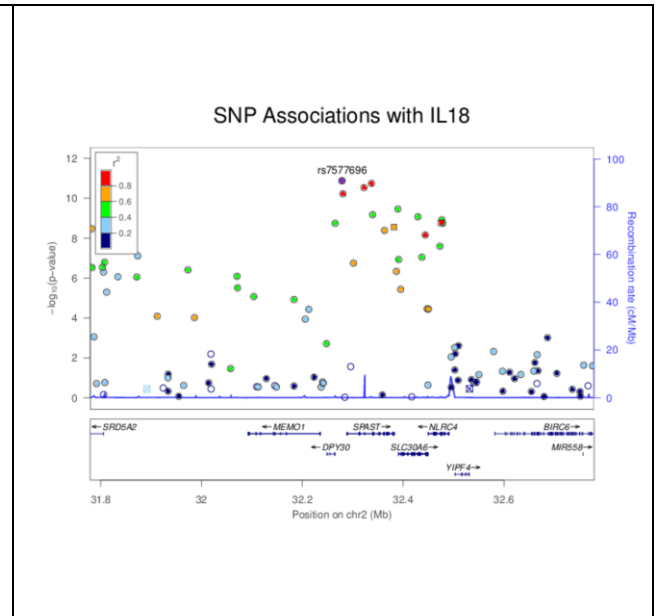

**Interleukin-23A** **Gene Name: *IL23A***

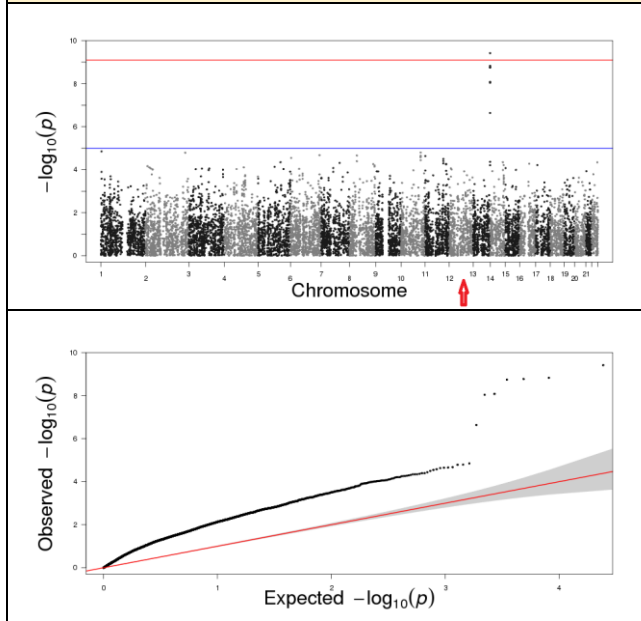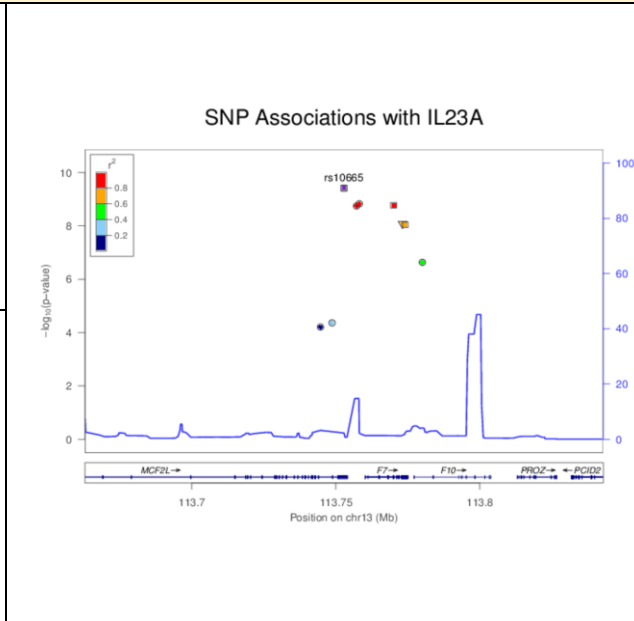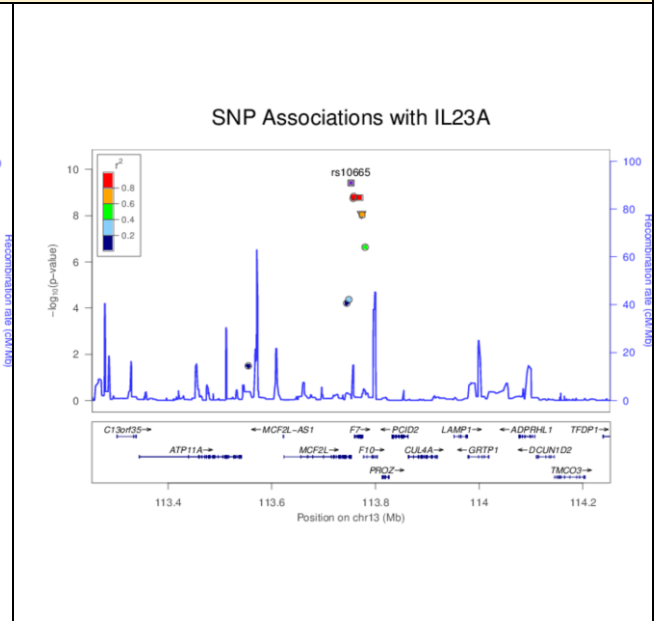

**Interleukin-2 receptor subunit alpha** **Gene Name: *IL2RA***

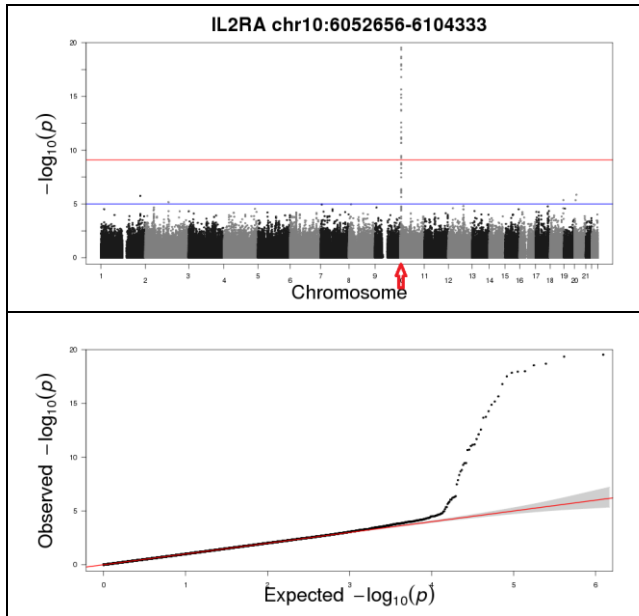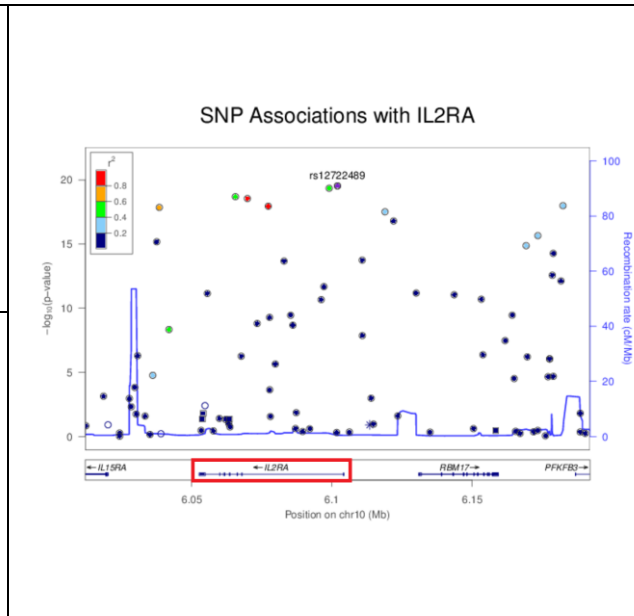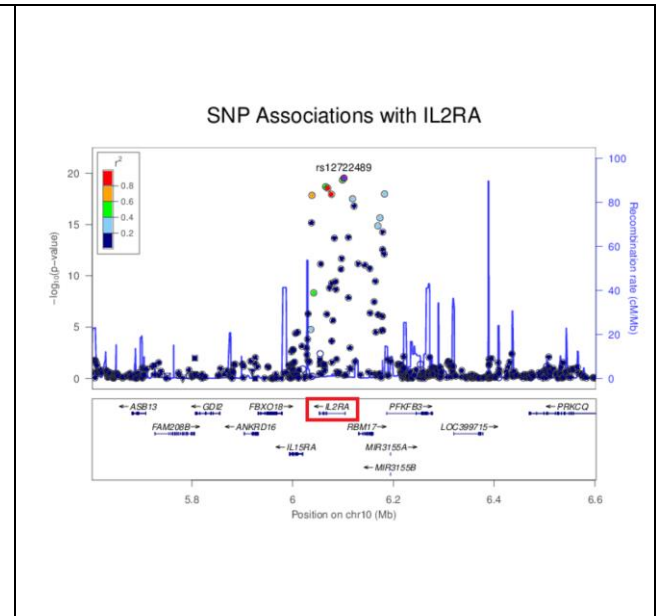

**Interleukin-6 receptor subunit alpha** **Gene Name: *IL6R***

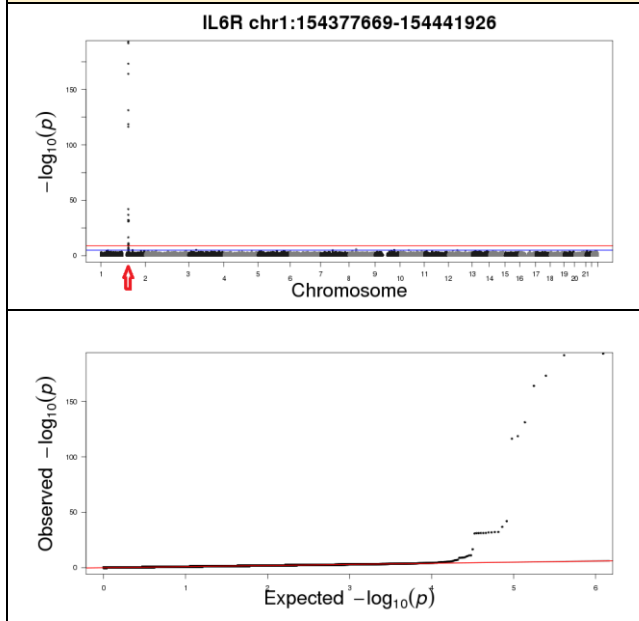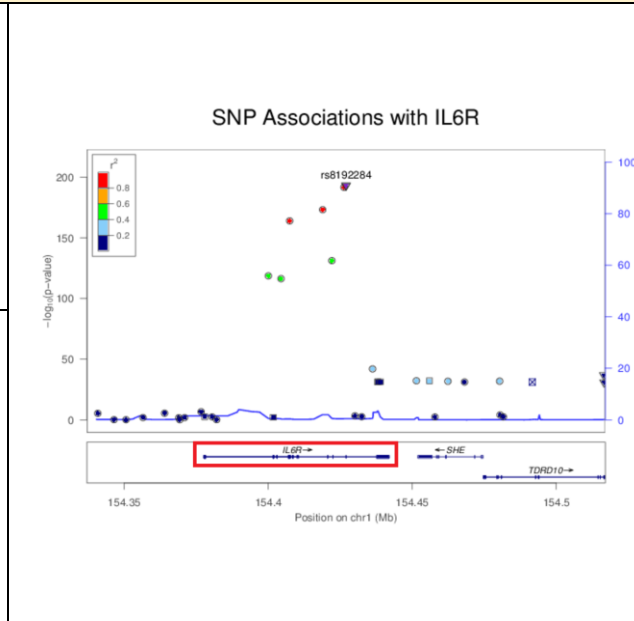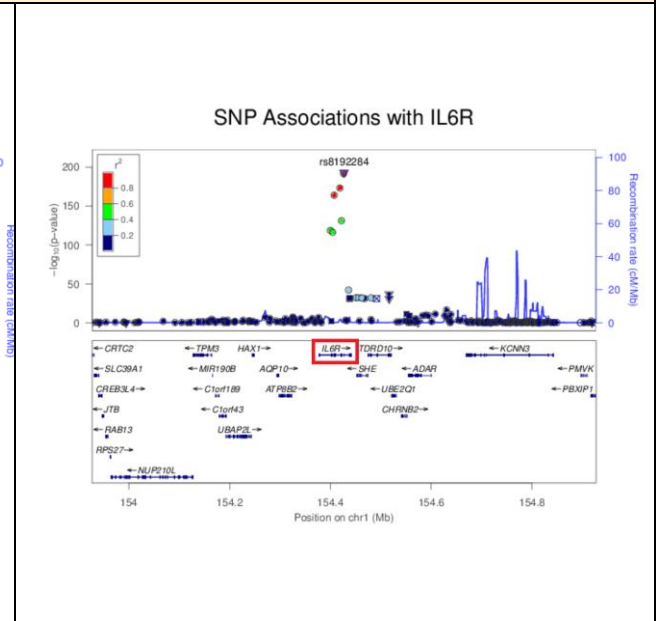

**Apolipoprotein(a)** **Gene Name: *LPA***

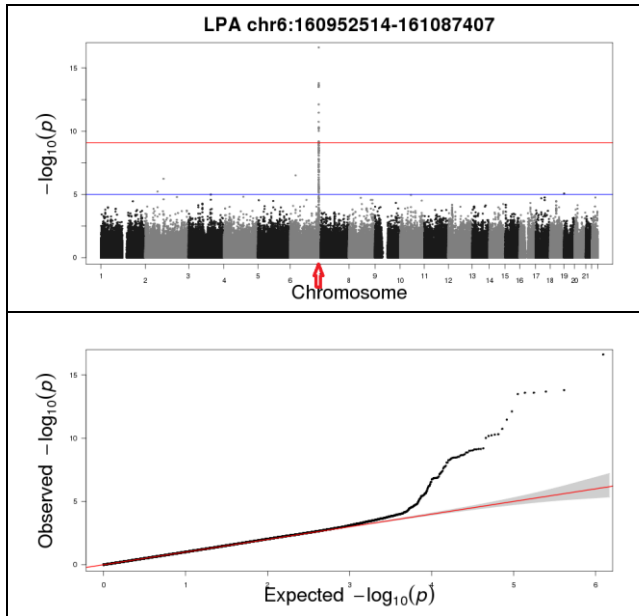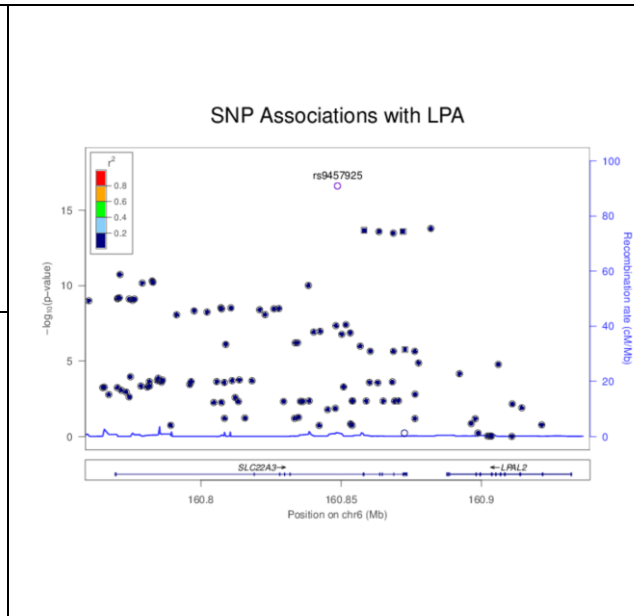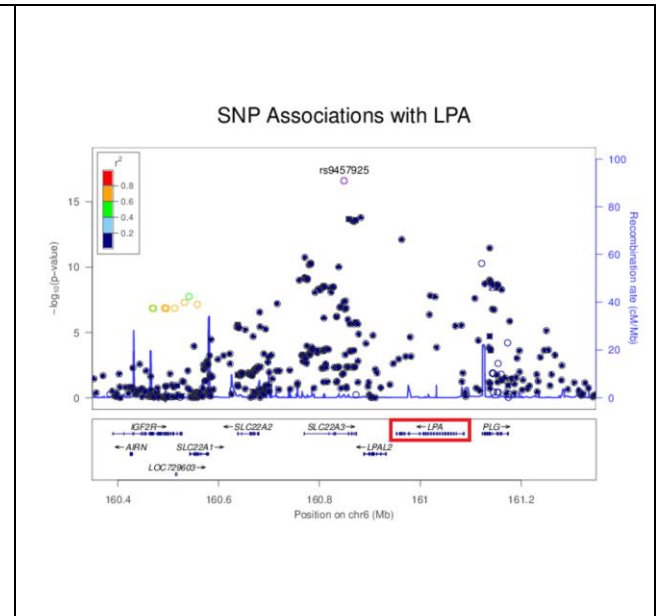

**Lactotransferrin** **Gene Name: *LTF***

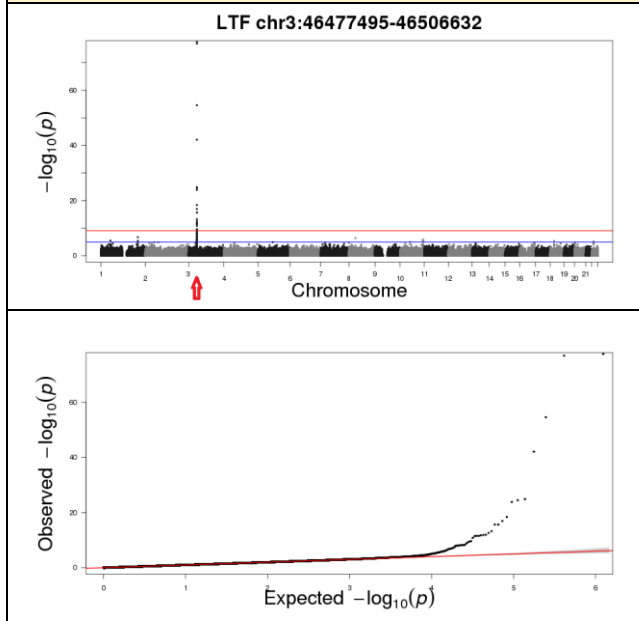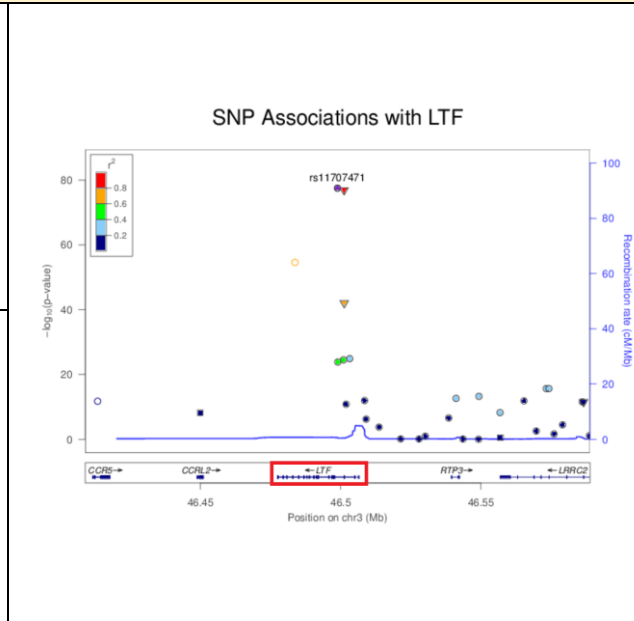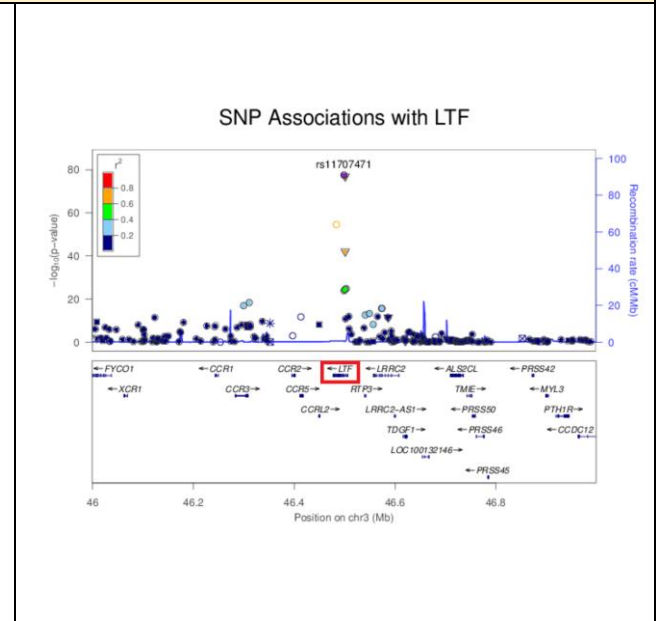

**MHC class I polypeptide-related sequence A** **Gene Name: *MICA***

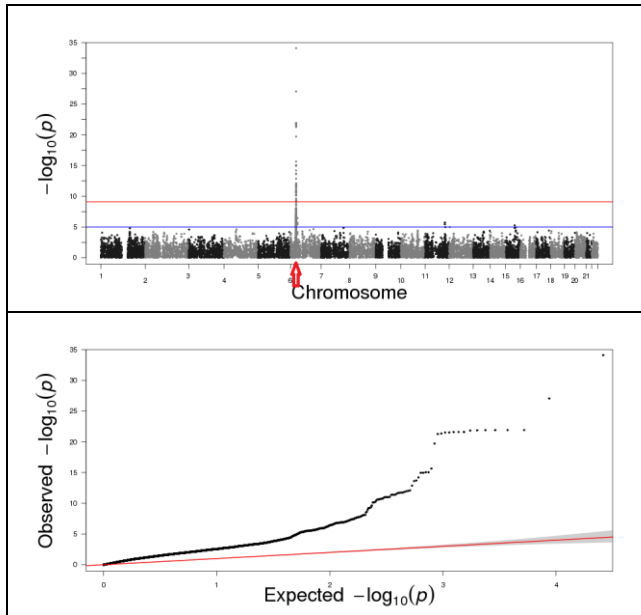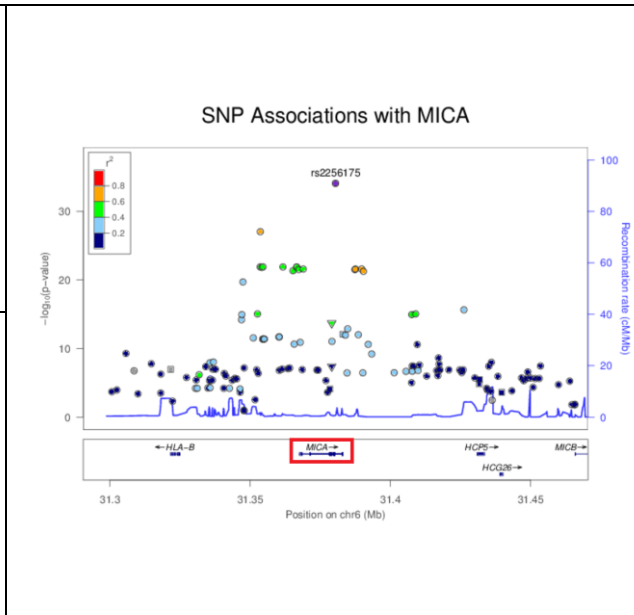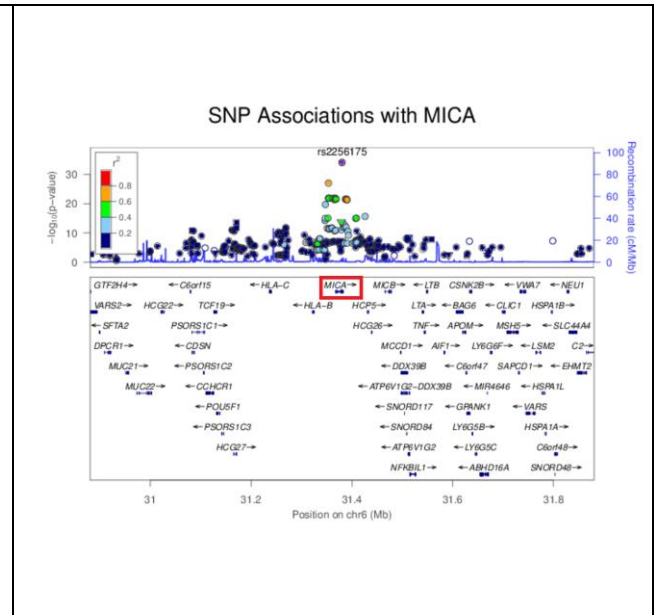

**Stromelysin-1 (Matrix Metalloproteinase-3; MMP-3)** Gene Name: *MMP3*

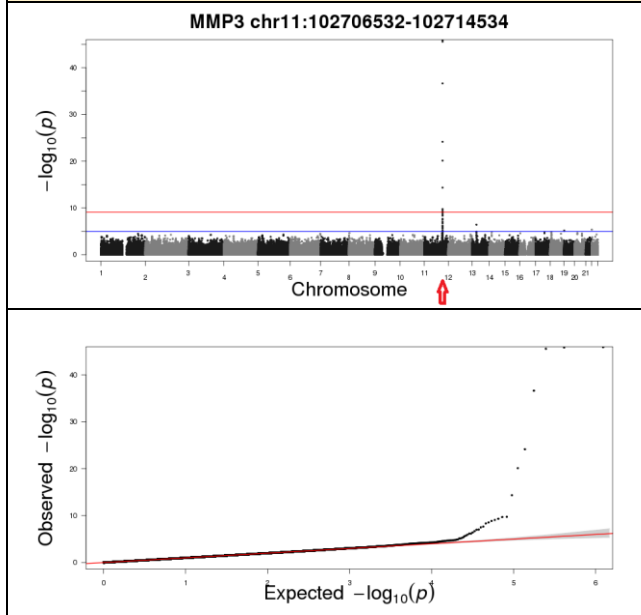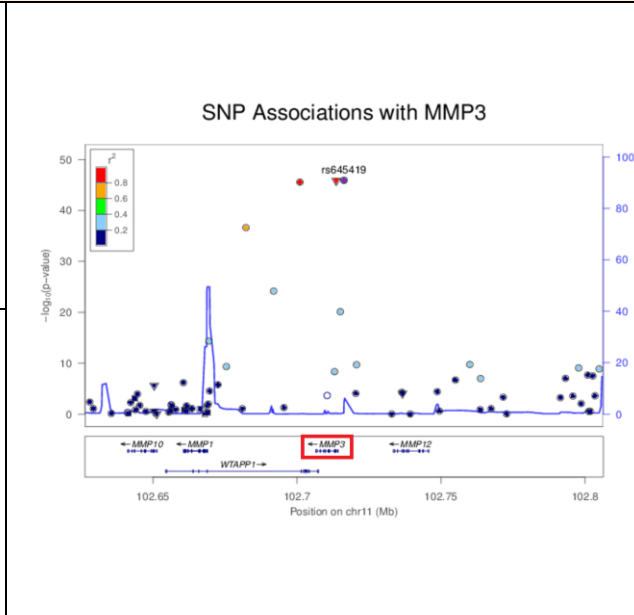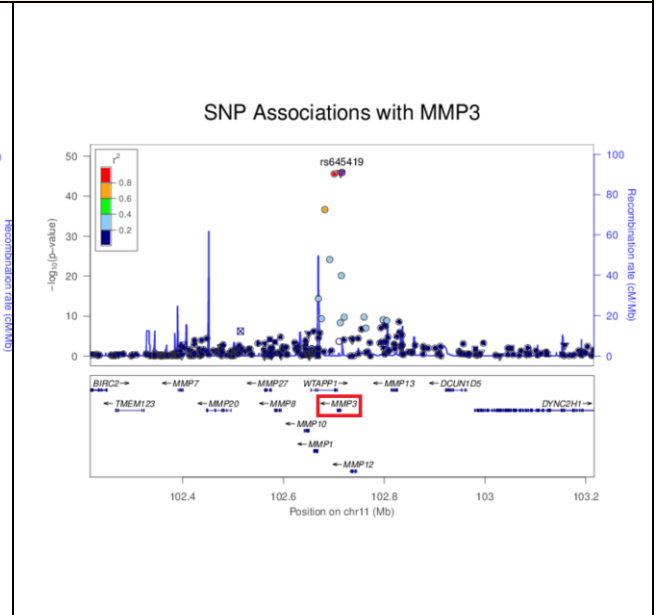

**Neuronal Cell Adhesion Molecule** Gene Name: *NRCAM*

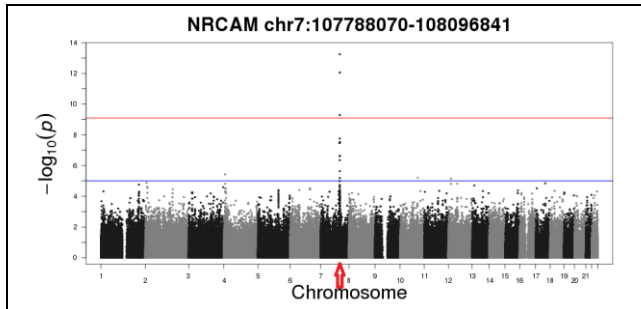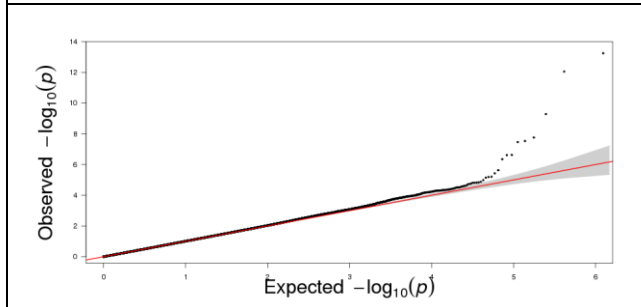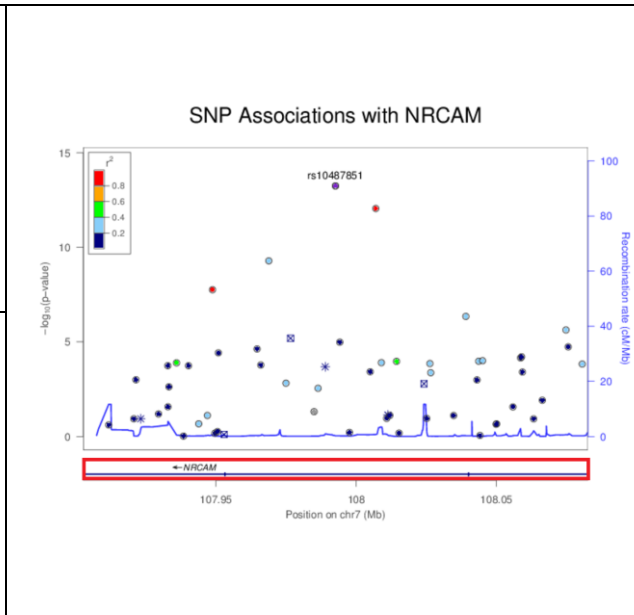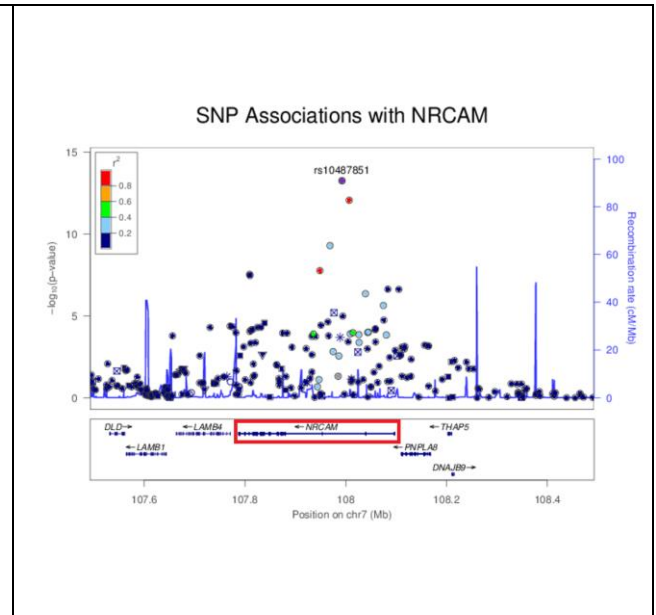

**Platelet endothelial cell adhesion molecule** **Gene Name: *PECAM1***

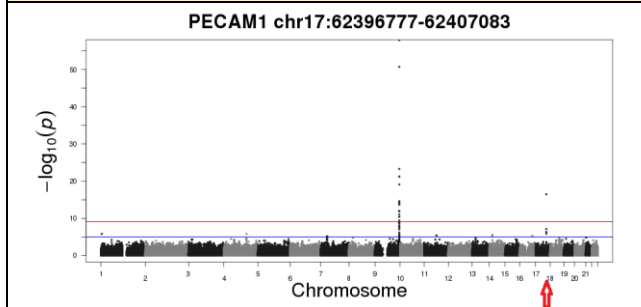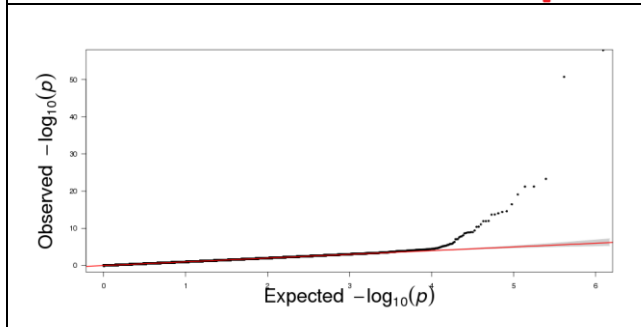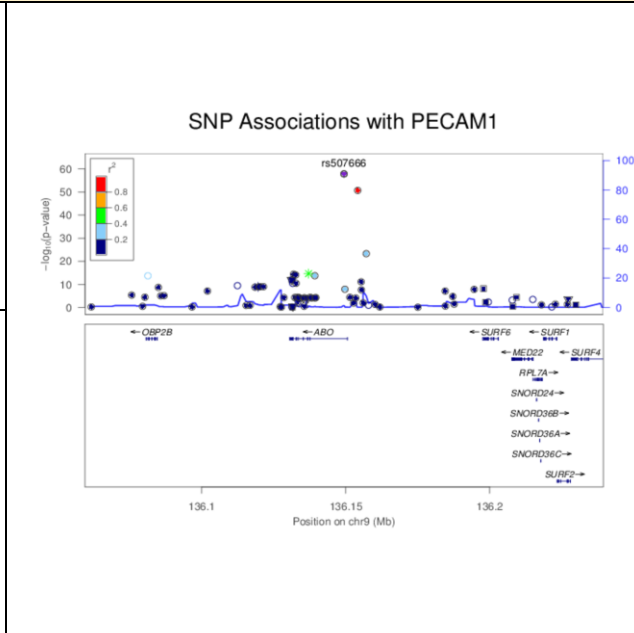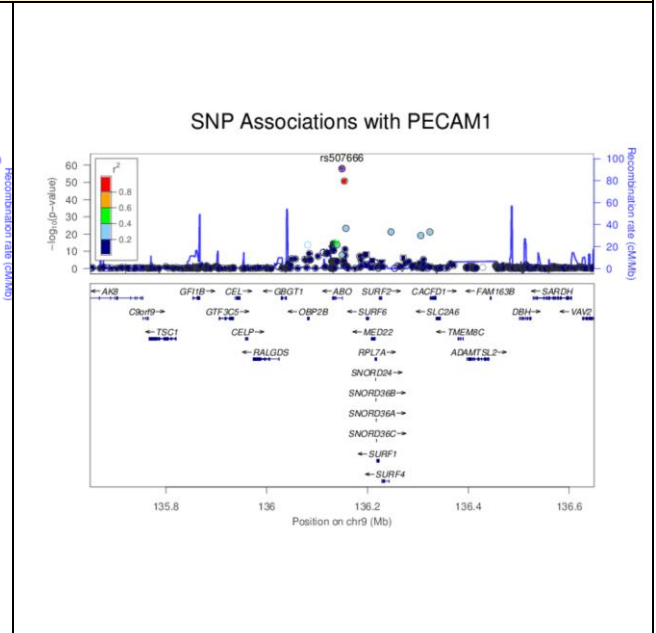

**E-selectin** **Gene Name: *SELE***

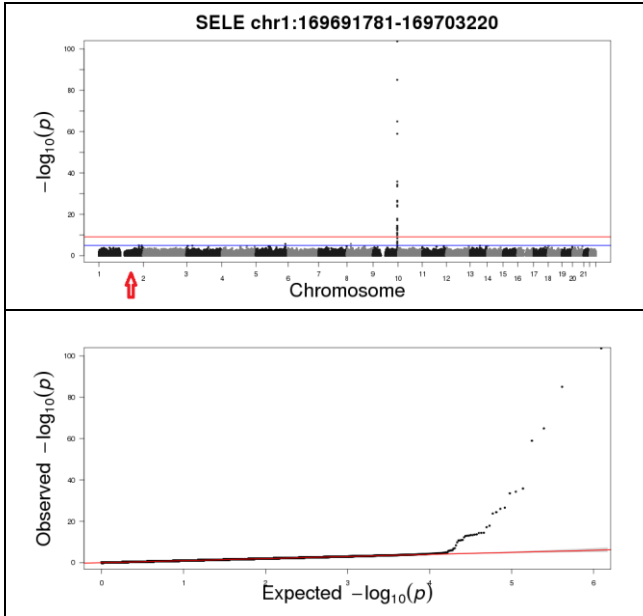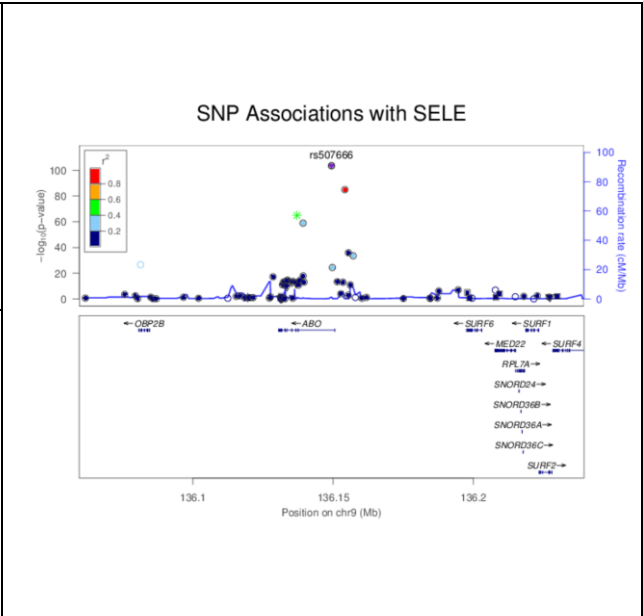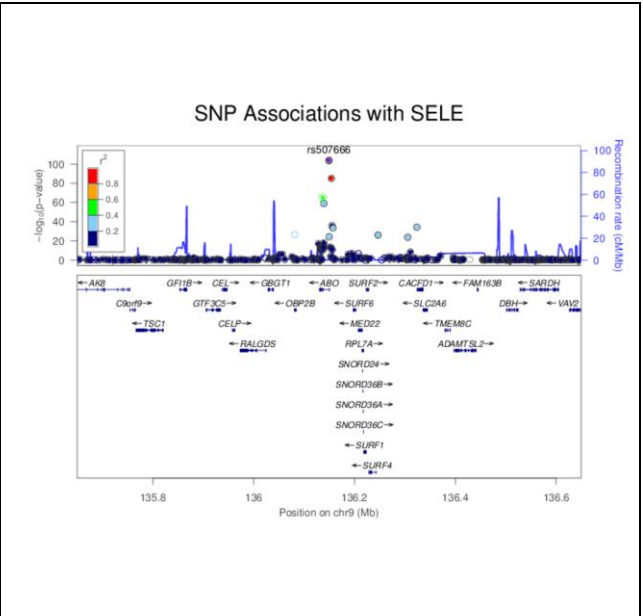

**Alpha-1-Antitrypsin** Gene Name: *SERPINA1*

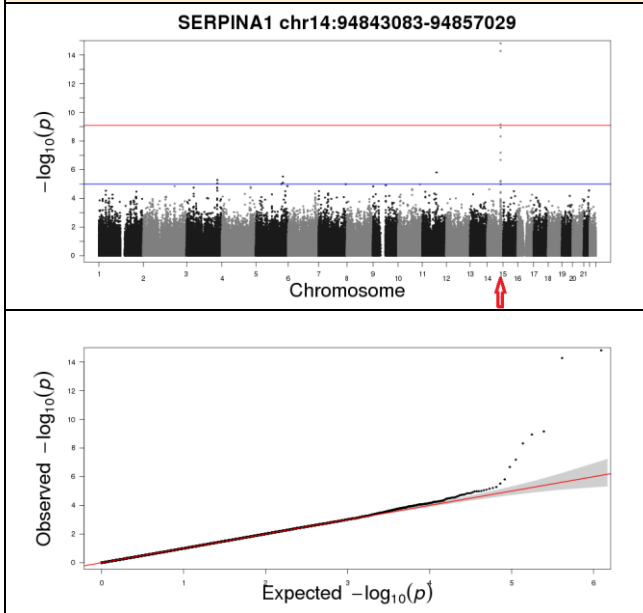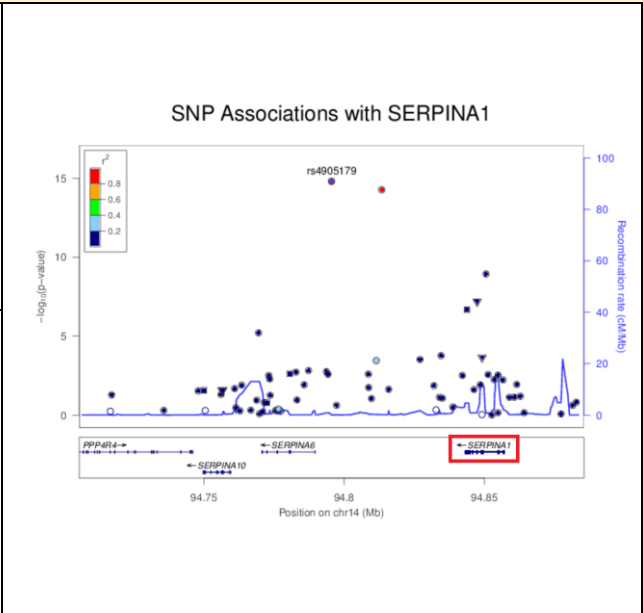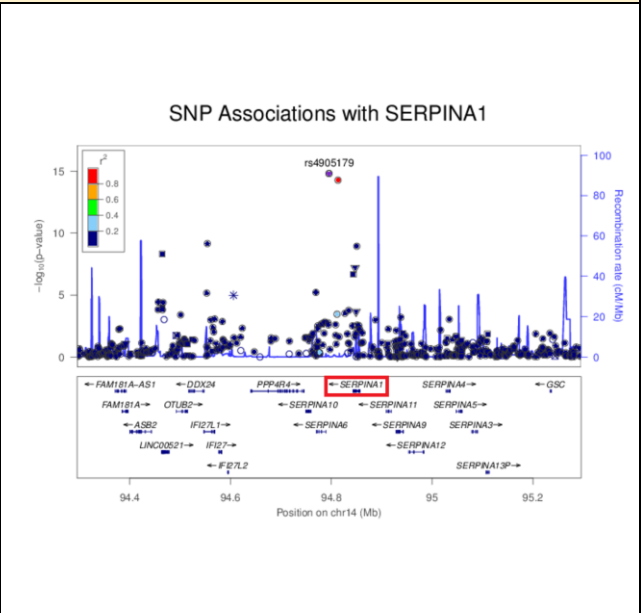

**Pulmonary surfactant-associated protein D (SP-D)** Gene Name: *SFTPD*



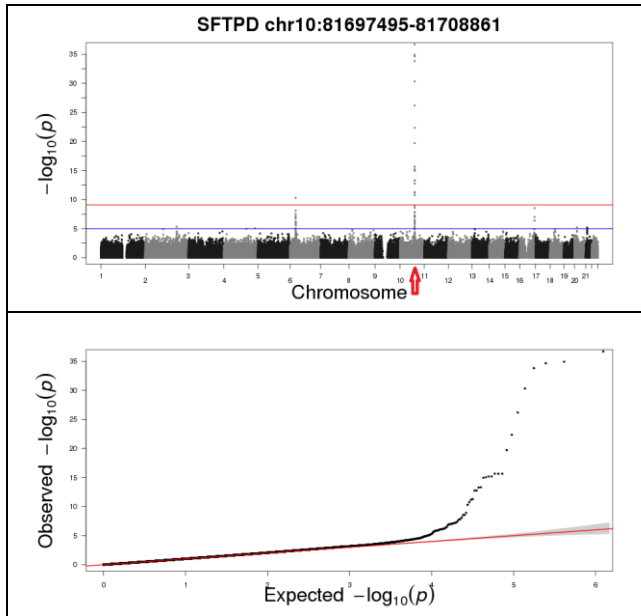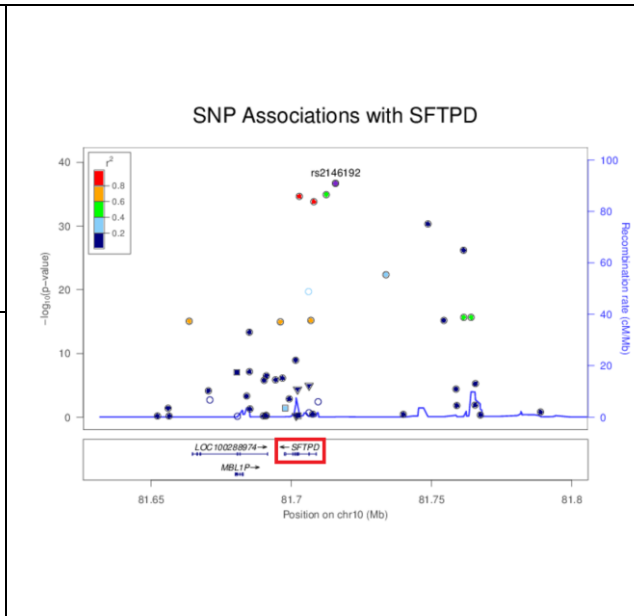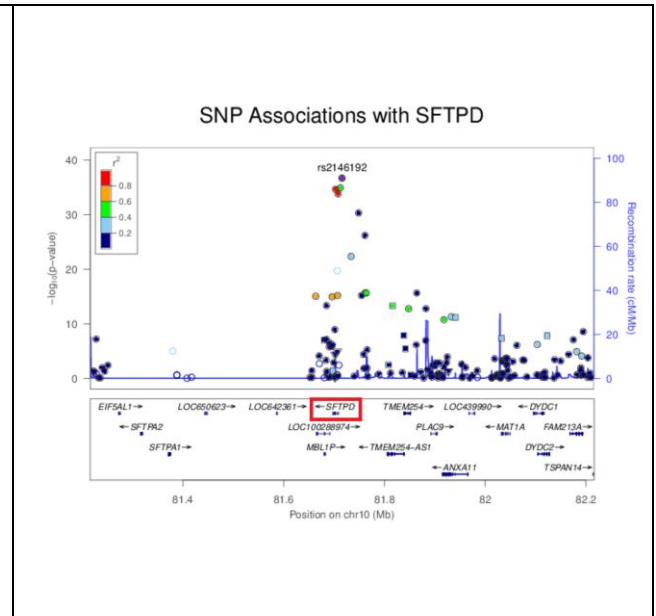

**Sex Hormone-Binding Globulin** Gene Name: *SHBG*

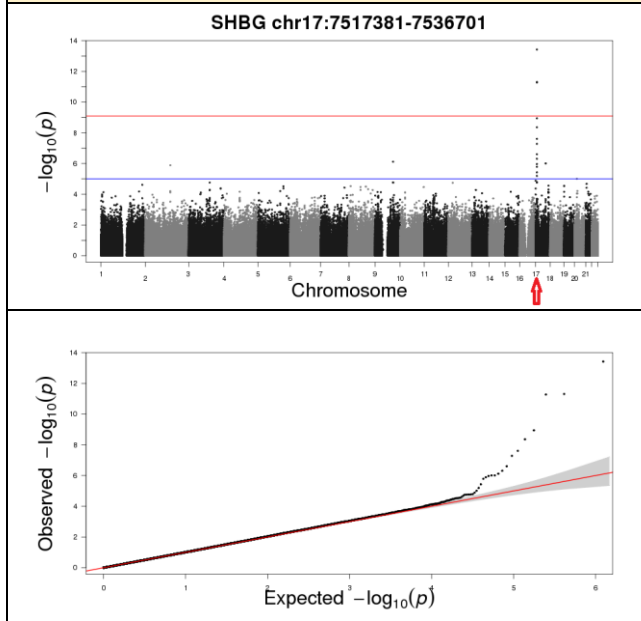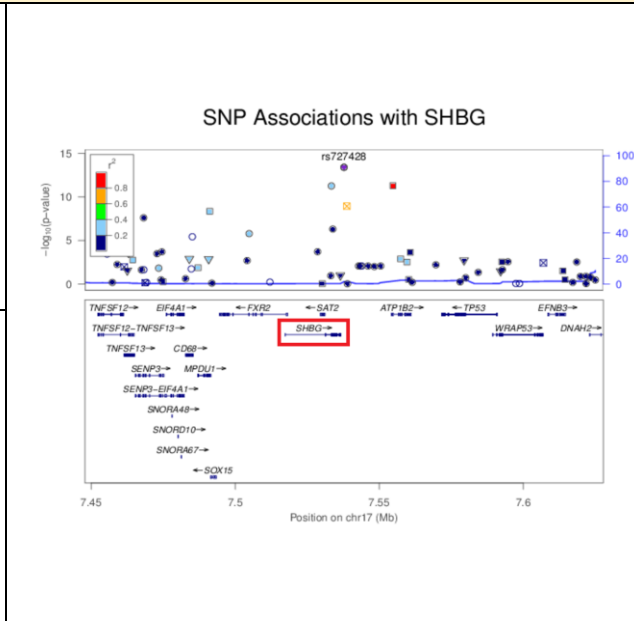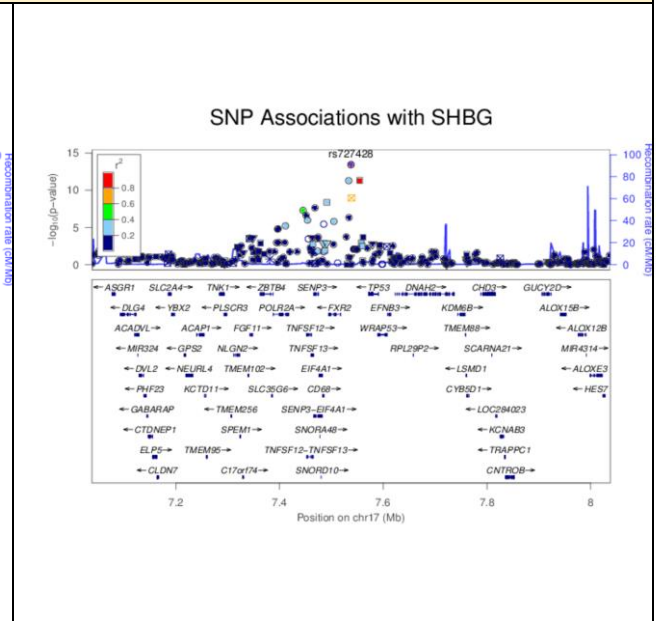

**Sortilin** Gene Name: *SORT1*

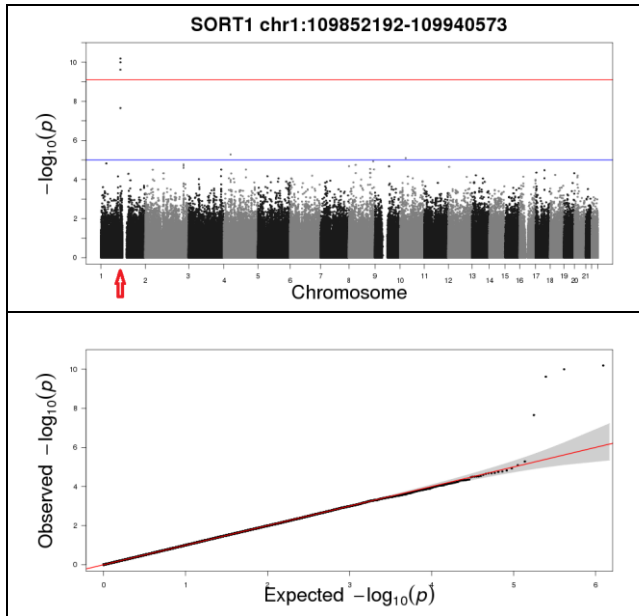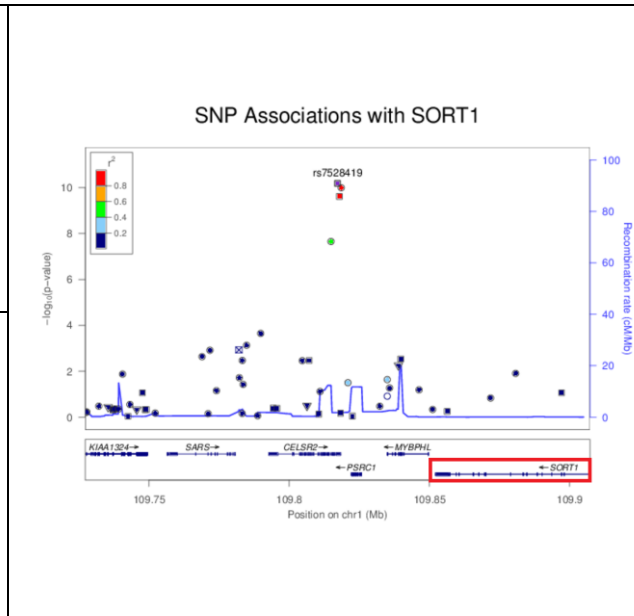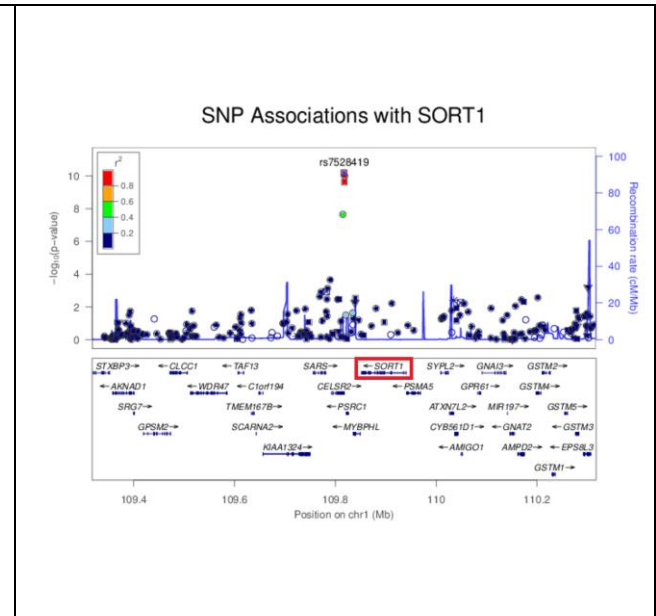

**Pancreatic secretory trypsin inhibitor (TATI) Gene Name: *SPINK1***

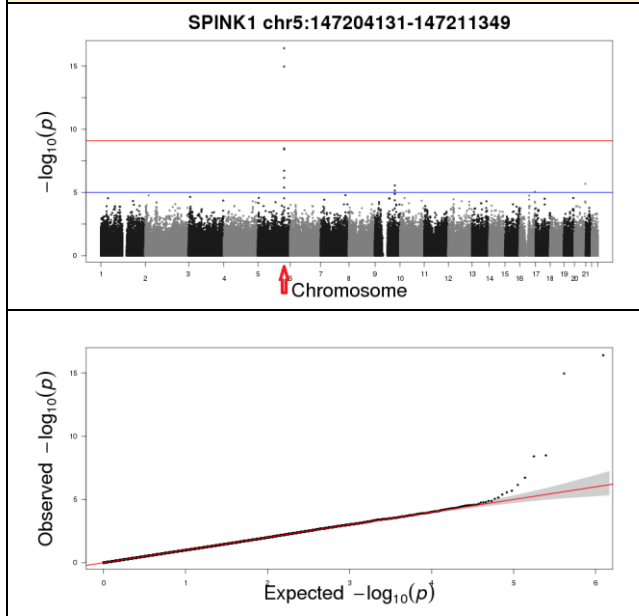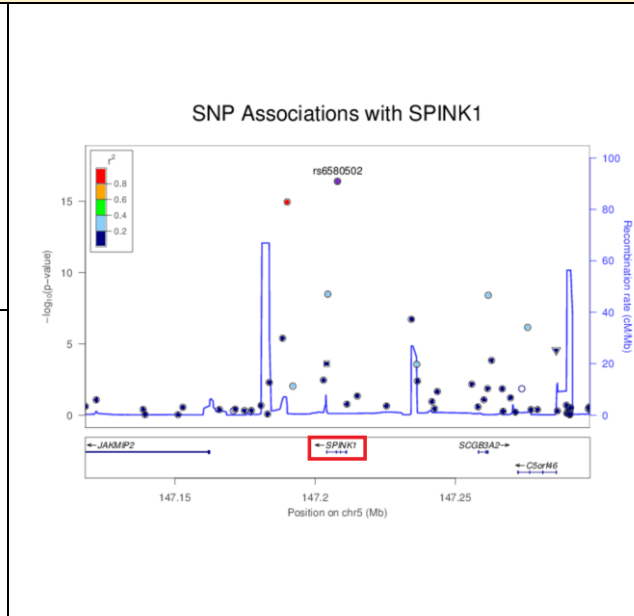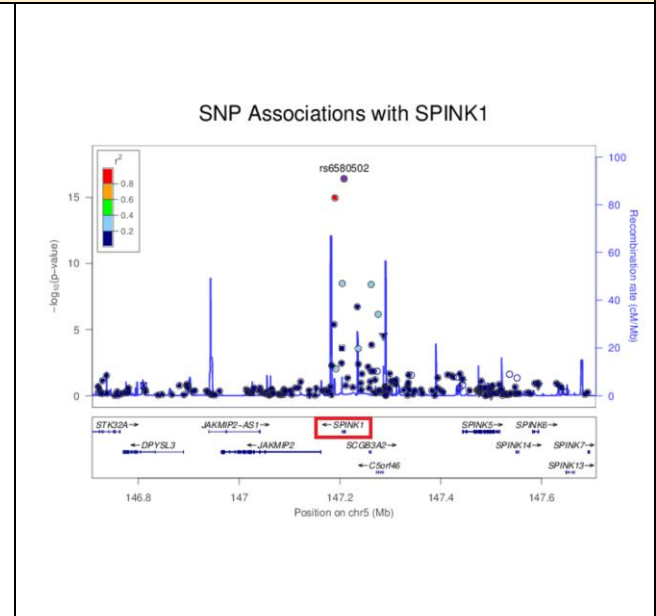

**Tumor necrosis factor receptor superfamily member 10C (TNF-Related Apoptosis-inducing Ligand Receptor 3; TRAIL-R3) Gene Name: *TNFRSF10C***

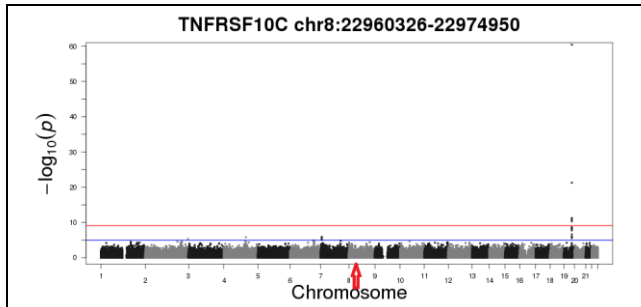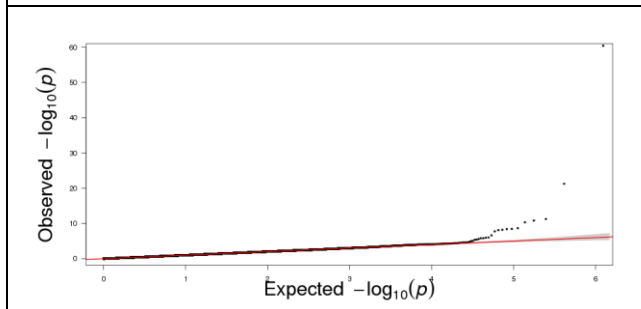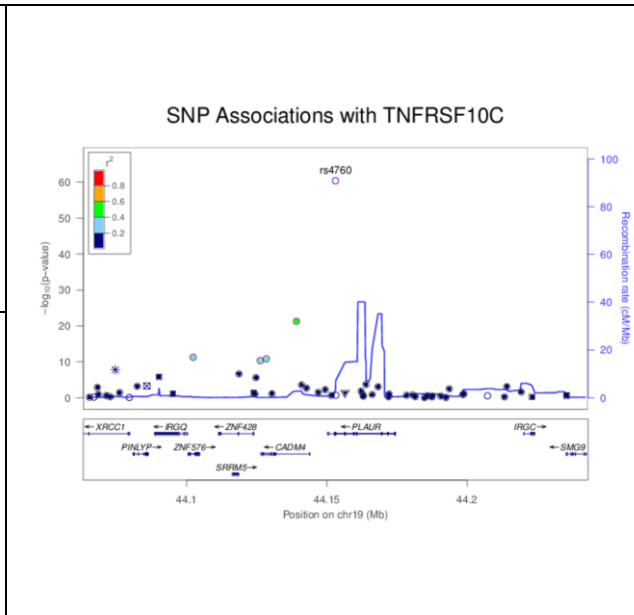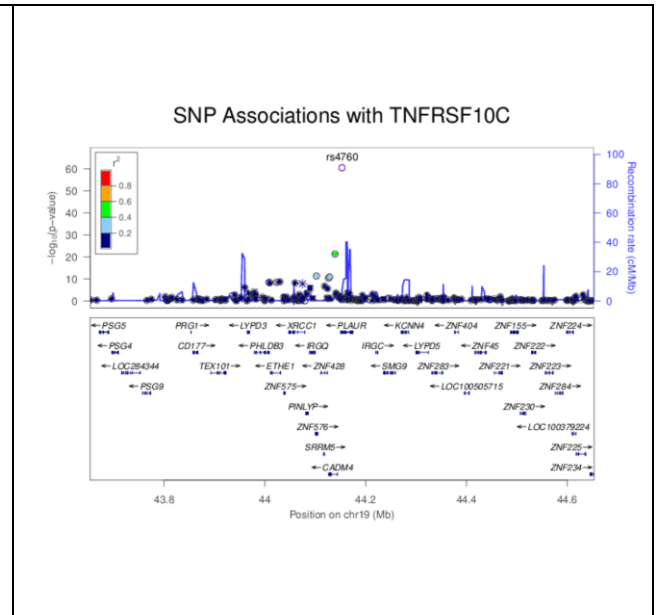

**Vascular Endothelial Growth Factor A** **Gene Name: VEGFA**

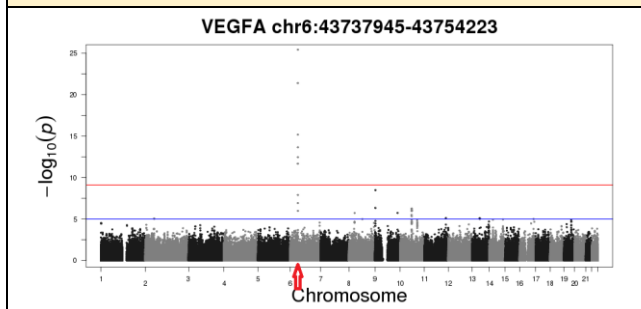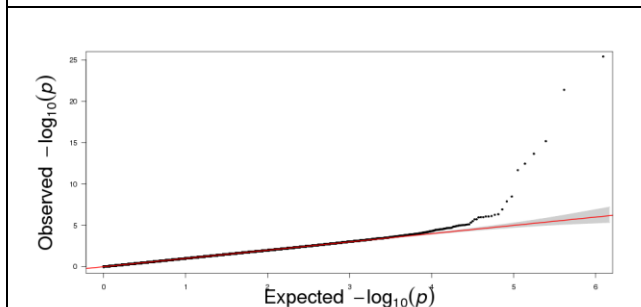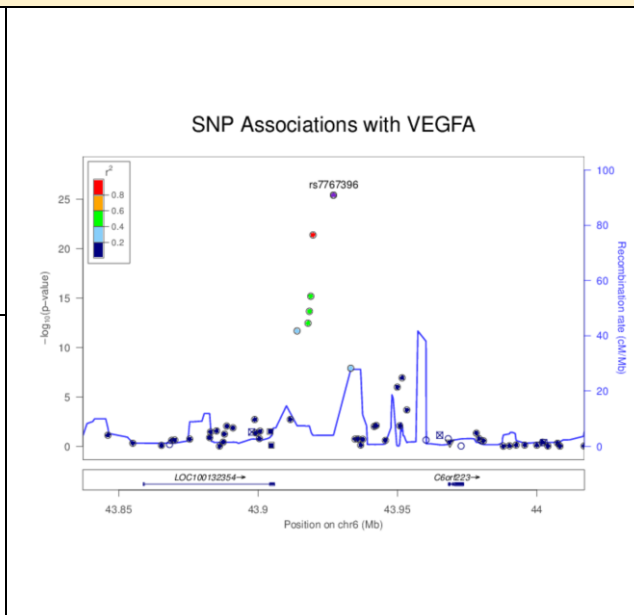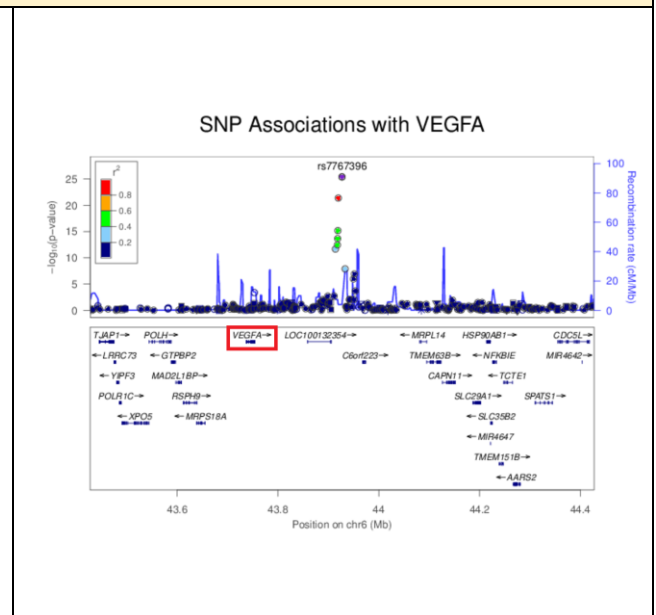

**von Willebrand Factor** **Gene Name: VWF**

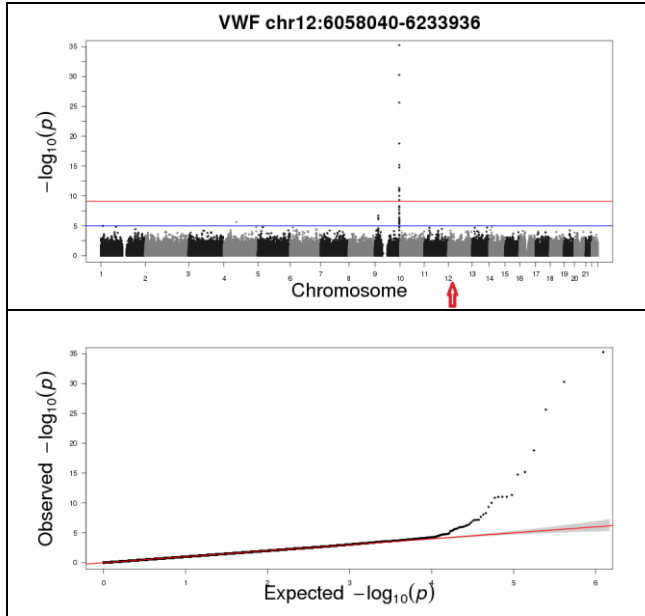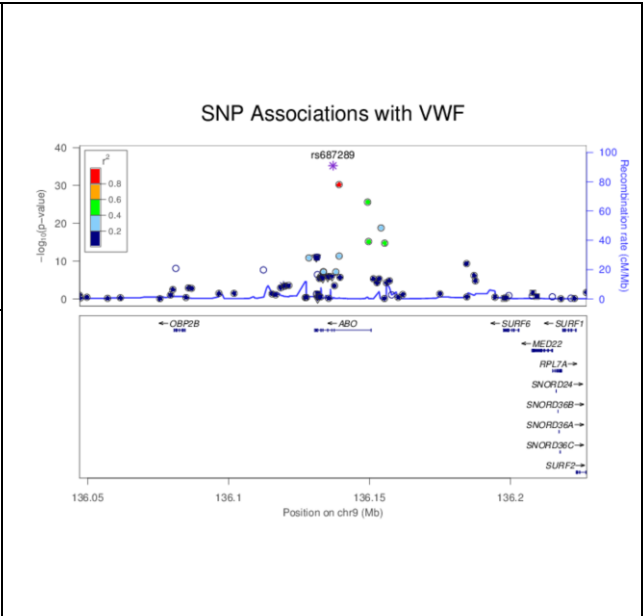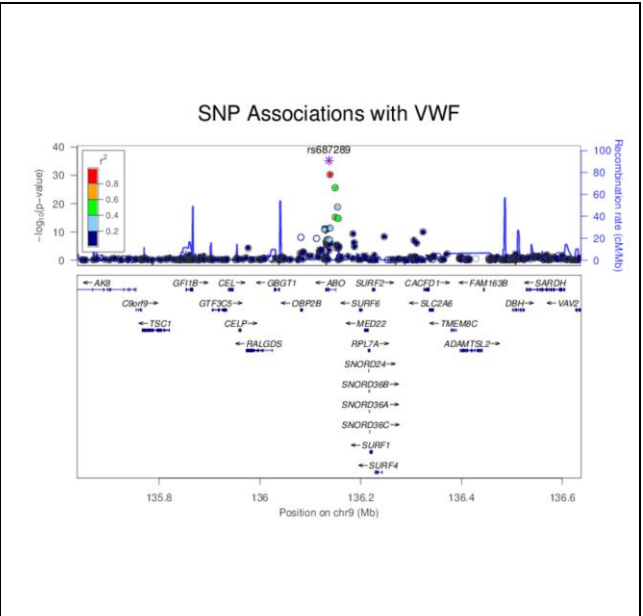

Supplement: pgen.1006011.s012.pdf [file pgen.1006011.s012.pdf]
