# Supplementary material for: Common Genetic Polymorphisms Influence Blood Biomarker Measurements in COPD
Source: PLoS Genet. 2016 Aug 17;12(8):e1006011. doi: 10.1371/journal.pgen.1006011 (PMC4988780; doi:10.1371/journal.pgen.1006011)
Supplement: S4 Table — The table is sorted alphabetically by gene name and then sorted by "weighted meta-analysis P-value". Distant pQTLs are denoted by light tan shading. pQTLs determined by the tobit model are designated by an * next to the gene name. The NHGRI GWAS catalog was searched 5-8-2015; pQTLs are unique if they are not listed in the GWAS catalog (GWAS) or not in LD with any SNP in the GWAS catalog (LD-GWAS). Traits listed for GWAS catalog SNPs and PMID numbers for the appropriate references are provided. Functional annotation of SNPs (variant effect predictor): up (upstream), 5′ (5′ untranslated region), syn (synonymous variant), mis (missense), int (intron), stop (stop gained), splice (splice region variant), 3′ (3′ untranslated region), down (downstream), inter (intergenetic), nc (non-coding transcript exon). The SNPs that do not replicate in direction of effect between the two cohorts are indicated in red. (XLSX) [file pgen.1006011.s004.xlsx]

## Sheet: Supplemental Table S4
S4 Table. All significant pQTLs, their minor allele frequencies (MAF), designation of uniqueness, and predicted functional consequences.
Analyte Gene Name	Analyte Gene Chr	pQTL SNP	pQTL SNP Chr	pQTL SNP location (bp)	COPDGene MAF	SPIROMICS MAF	COPDGene P-value	SPIROMICS P-value	COPDGene beta/z-statistic	SPIROMICS beta/z-statistic	Weighted Meta-analysis P-value	Present in GWAS catalog	Disease Trait (s) if present in GWAS catalog	PMID(s) GWAS catalog	Function
AGER	6	rs2070600	6	32151443	0.043	0.0513333	2.14e-13	1.96e-10	-0.9924	-0.7091	2.94e-22	GWAS	Pulmonary function (and interaction)	23284291; 20010835; 20010834	mis
AGER	6	rs2844456	6	31864674	0.0378	0.044	2.76e-10	1.16e-07	-0.967	-0.6356	4.44e-16	unique			int
AGER	6	rs2022059	6	32156489	0.0469	0.0513333	5.67e-08	3.37e-09	-0.7962	-0.6411	1.11e-15	unique
AGER	6	rs2856437	6	32157364	0.0472	0.0513333	7.7e-08	3.37e-09	-0.7739	-0.6411	1.33e-15	unique
AGER	6	rs34562262	6	32020961	0.0384	0.044	3.19e-09	9.32e-08	-0.9004	-0.6405	2.22e-15	unique
AGER	6	rs35502919	6	31604355	0.038	0.0446667	1.51e-07	1.14e-07	-0.7803	-0.631	9.26e-14	unique
AGER	6	rs2854050	6	32185605	0.0601	0.068	2.57e-06	1.01e-06	-0.6371	-0.4725	1.21e-11	unique			int
AGER	6	rs206015	6	32182759	0.109	0.124	0.000335	4.65e-08	-0.3312	-0.414	9.96e-11	unique			int
AGER	6	rs206016	6	32181182	0.107	0.122667	0.000707	5.67e-08	-0.3148	-0.4131	2.81e-10	unique			int
AGER	6	rs206019	6	32180241	0.107	0.122667	0.000763	5.67e-08	-0.3118	-0.4131	3.07e-10	unique
APOA4	11	rs4938353	11	117046197	0.183	0.185581	1.64e-10	4.31e-06	0.5011	0.2934	1.6e-14	unique			3'
APOA4	11	rs1060211	11	117039797	0.181	0.184667	2.04e-10	5.26e-06	0.4991	0.2894	2.44e-14	unique			3'
APOA4	11	rs672058	11	116764021	0.127	0.118	1.11e-09	0.000124	0.5624	0.2925	4.72e-12	LD-GWAS			int
APOA4	11	rs1263173	11	116681008	0.28	0.294	2.02e-07	3.25e-05	0.344	0.2273	5.47e-11	GWAS	Coronary heart disease	21347282	down
APOA4	11	rs2000614	11	116915742	0.111	0.099466	5.21e-09	0.00183	0.5648	0.2547	5.38e-10	unique			int
APOA4	11	rs2075292	11	116732512	0.114	0.102667	5.86e-10	0.00506	0.5742	0.2215	5.39e-10	GWAS; LD-GWAS	Triglycerides	18193046	int
APOA4	11	rs518181	11	116772787	0.371	0.375333	0.000295	4.49e-07	0.2257	0.2636	6.51e-10	unique			int
APOA4	11	rs1351452	11	116943354	0.111	0.0986667	6.43e-09	0.00196	0.5634	0.2534	6.91e-10	unique			int
APOA4	11	rs4938315	11	116731205	0.115	0.103471	5.39e-10	0.00642	0.5753	0.2153	7.37e-10	LD-GWAS			int
APOA4	11	rs10892063	11	116896155	0.362	0.366667	0.000486	3.05e-07	0.2189	0.2688	7.95e-10	unique			int
C3	19	rs2230203	19	6710782	0.181	0.196	1.28e-07	0.000407	-0.3724	-0.1912	7.77e-10	unique			syn
CCL16	17	rs11080369	17	34305164	0.0664	0.064	1.16e-37	2.8e-32	-1.285	-1.121	8.37e-68	unique
CCL16	17	rs4796144	17	34293003	0.0507	0.0466667	2.25e-17	3.21e-24	-1.052	-1.099	3.24e-40	unique
CCL16	17	rs2063979	17	34303566	0.29	0.294	2.17e-07	9.34e-13	-0.3137	-0.3711	8.08e-19	unique			3'
CCL16	17	rs854685	17	34319126	0.128	0.123333	4.32e-08	2.84e-08	-0.4462	-0.4034	6.88e-15	unique			int
CCL16	17	rs854680	17	34309051	0.208	0.210174	7.31e-05	1.37e-11	-0.2687	-0.3989	1.49e-14	unique			up
CCL16	17	rs854692	17	34323944	0.199	0.197333	1.15e-05	5.97e-07	-0.2894	-0.3026	3e-11	unique			3'
CCL18	17	rs854469	17	34389361	0.13	0.128667	1.06e-21	1.74e-16	0.7486	0.5868	3.15e-36	unique
CCL18	17	rs1102934	17	34389914	0.13	0.128667	1.33e-21	1.74e-16	0.7473	0.5868	3.84e-36	unique
CCL18	17	rs854632	17	34374779	0.11	0.109333	4.51e-21	2.02e-14	0.7912	0.5937	2.45e-33	unique
CCL18	17	rs854462	17	34386090	0.123	0.12	4.88e-20	6.06e-15	0.7307	0.5744	4.69e-33	unique			inter
CCL18	17	rs854636	17	34372818	0.111	0.11	3.26e-20	4.36e-14	0.7763	0.5808	3.24e-32	unique
CCL18	17	rs972317	17	34371659	0.105	0.105333	5.75e-19	6.89e-13	0.7705	0.5608	8.6e-30	unique			inter
CCL18	17	rs9892586	17	34313915	0.0539	0.0526667	0.00033	3.52e-07	0.4429	0.5375	5.89e-10	unique
CCL23	17	rs1617208	17	34338883	0.186	0.184667	5.64e-12	2.32e-18	-0.4881	-0.5071	5.59e-29	unique
CCL23	17	rs860559	17	34346267	0.186	0.182	6.07e-12	8.15e-18	-0.4846	-0.5013	2e-28	unique
CCL23	17	rs6505503	17	34351034	0.172	0.166667	3.03e-11	5.3e-14	-0.4776	-0.4584	5.16e-24	unique
CCL23	17	rs7217473	17	34319064	0.0591	0.0594126	4.41e-12	2.93e-12	-0.7997	-0.6436	4.76e-23	unique
CCL23	17	rs854692	17	34323944	0.199	0.197333	2.21e-08	2.08e-14	-0.3824	-0.4307	2e-21	unique			3'
CCL23	17	rs854625	17	34328461	0.04	0.0393333	6.27e-06	1.63e-13	-0.7241	-0.8479	8.28e-18	unique
CCL23	17	rs16971802	17	34311387	0.0526	0.0533333	1.78e-09	3.43e-08	-0.7372	-0.539	4.44e-16	unique			mis
CCL23	17	rs1719200	17	34338078	0.0591	0.056	2.48e-06	1.38e-09	-0.5925	-0.6026	1.89e-14	unique
CCL23	17	rs854678	17	34358886	0.476	0.466622	0.00202	1.78e-10	0.1771	0.2894	8.96e-12	LD-GWAS
CCL23	17	rs854672	17	34360838	0.478	0.468667	0.003	8.46e-10	0.1701	0.2789	5.39e-11	LD-GWAS
CCL23	17	rs854677	17	34359243	0.479	0.469333	0.003	1.37e-09	0.1701	0.2749	7.93e-11	LD-GWAS
CCL24	7	rs10755885	7	75463505	0.103	0.0925676	3.74e-60	5.39e-69	1.425	1.445	1.77e-127	unique			up
CCL24	7	rs6946822	7	75479448	0.494	0.495333	4.02e-27	2.89e-43	-0.6009	-0.6612	1.13e-68	unique			int
CCL24	7	rs2024049	7	75496097	0.493	0.489333	4.19e-27	1.15e-36	0.5944	0.6123	2.65e-62	unique			int
CCL24	7	rs4620231	7	75386669	0.189	0.172667	5.53e-05	3.38e-12	0.2952	0.46	3.11e-15	unique			inter
CCL24	7	rs2240478	7	75401418	0.186	0.170667	3.3e-05	3.21e-11	0.3033	0.4383	1.15e-14	unique			splice
CCL24	7	rs11984438	7	75879334	0.221	0.243333	0.000127	1.12e-11	0.2768	0.3858	2.46e-14	unique			int
CCL24	7	rs1894761	7	75876754	0.234	0.257009	0.000105	1.8e-11	0.2711	0.3779	2.93e-14	unique			int
CCL24	7	rs10280802	7	75529137	0.225	0.192667	7.12e-06	9.8e-10	0.3097	0.398	4.26e-14	unique			int
CCL24	7	rs11465307	7	75441794	0.278	0.304	2.34e-06	1.22e-06	0.3086	0.2711	1.35e-11	unique			int
CCL24	7	rs7807085	7	75437107	0.142	0.140187	6.76e-05	5.01e-08	-0.3324	-0.3873	1.79e-11	unique			down
CCL24	7	rs2302006	7	75442730	0.193	0.197861	2.78e-06	5.55e-06	-0.3443	-0.2807	7.56e-11	unique			mis
CCL24	7	rs3757598	7	75445377	0.23	0.243333	0.00243	3.03e-09	0.2122	0.3513	1.13e-10	unique			int
CCL24	7	rs7807392	7	75510561	0.169	0.155333	2.6e-07	0.000114	-0.3795	-0.2711	2.9e-10	unique			int
CCL24	7	rs10255642	7	75511134	0.169	0.155333	4.62e-07	0.000114	-0.3707	-0.2711	4.6e-10	unique			int
CCL4	17	rs3213636	17	34475131	0.189	0.200267	1.73e-08	1.27e-13	-0.4248	-0.4471	8.2e-21	unique
CCL4	17	rs34045601	3	46449864	0.148	0.162	3.22e-09	2.73e-10	0.4628	0.4033	2.54e-18	unique
CCL4	17	rs8064426	17	34819750	0.135	0.128667	0.000572	2e-13	-0.2975	-0.5176	7.11e-15	unique			inter
CCL4	17	rs4796217	17	34819191	0.296	0.30615	1.01e-07	1.43e-08	-0.3425	-0.2953	7.55e-15	GWAS	Protein quantitative trait loci	18464913	inter
CCL4	17	rs8067765	17	34815551	0.061	0.0626667	0.000131	3.16e-11	-0.4688	-0.6412	6.15e-14	unique
CCL8	17	rs3848464	17	32639369	0.101	0.100667	1.05e-20	3.37e-12	-0.9322	-0.5239	2.1e-30	unique			inter
CCL8	17	rs2215184	17	32634859	0.102	0.100801	1.05e-20	3.4e-12	-0.9322	-0.5242	2.1e-30	unique			inter
CCL8	17	rs12602195	17	32660149	0.161	0.156876	2.93e-19	5.68e-12	-0.7017	-0.4295	6.19e-29	unique			up
CCL8	17	rs442319	17	32675472	0.172	0.1749	1.29e-17	2.38e-09	-0.6537	-0.3587	1.9e-24	unique			inter
CCL8	17	rs9914367	17	32656602	0.359	0.368	3.67e-10	2.2e-10	-0.3681	-0.3092	2.63e-19	unique			down
CCL8	17	rs365654	17	32677709	0.141	0.145527	2.36e-09	1.28e-07	-0.4979	-0.363	2.44e-15	unique			inter
CCL8	17	rs16969415	17	32612402	0.0461	0.048	2.97e-09	1.23e-05	-0.8902	-0.4807	5.73e-13	unique			up
CDH1	16	rs516246	19	49206172	0.482	0.499333	1.21e-12	8.95e-16	-0.4063	-0.3497	3.71e-27	GWAS; LD-GWAS	Obesity-related traits; Crohns disease; Liver enzyme levels (gamma-glutamyl transferase)	23251661; 23128233; 22001757	int
CDH1	16	rs601338	19	49206674	0.478	0.49733	3.28e-12	3.64e-16	-0.3985	-0.3547	4.11e-27	GWAS; LD-GWAS	Blood metabolite levels; Blood metabolite ratios	24816252	stop
CDH1	16	rs492602	19	49206417	0.482	0.499333	1.47e-12	8.95e-16	-0.4042	-0.3497	4.5e-27	GWAS; LD-GWAS	Cholesterol, total; Vitamin B12 levels	24097068; 20686565; 18776911	syn
CDH1	16	rs681343	19	49206462	0.482	0.499333	1.47e-12	8.95e-16	-0.4042	-0.3497	4.5e-27	LD-GWAS			syn
CDH1	16	rs485186	19	49207206	0.492	0.474	6.75e-12	2.6e-15	0.3831	0.3447	5.89e-26	LD-GWAS			syn
CDH1	16	rs569970	19	49207718	0.495	0.477333	4.14e-12	6.35e-15	0.3887	0.34	8.76e-26	LD-GWAS			3'
CDH1	16	rs503279	19	49209010	0.495	0.476667	4.14e-12	1.05e-14	0.3887	0.3379	1.45e-25	GWAS; LD-GWAS	Blood metabolite ratios; Metabolic traits	24816252; 21886157	3'
CDH1	16	rs602662	19	49206985	0.493	0.476	9.13e-12	4.85e-15	0.3818	0.3423	1.47e-25	GWAS; LD-GWAS	Folate pathway vitamin levels	19744961; 19303062	mis
CDH1	16	rs504963	19	49208865	0.496	0.476667	4.4e-12	1.05e-14	0.3876	0.3379	1.54e-25	GWAS; LD-GWAS	Crohns disease	20570966	3'
CDH1	16	rs2287921	19	49228272	0.487	0.464667	2.54e-07	3.41e-11	0.3002	0.2923	2.67e-17	GWAS; LD-GWAS	Urinary metabolites (H-NMR features); Bipolar disorder; Retinal vascular caliper	24586186; 21926972; 21060863
CDH1	16	rs454715	19	49114236	0.404	0.408667	3.58e-09	4.2e-08	-0.3409	-0.2435	1.11e-15	unique			int
CDH1	16	rs507666	9	136149399	0.2	0.176	1.22e-07	8.55e-09	-0.3684	-0.3397	5.33e-15	GWAS; LD-GWAS	Lipid traits; Soluble ICAM-1	24386095; 21533024; 18604267	int
CDH1	16	rs579459	9	136154168	0.225	0.198667	5.37e-07	8.68e-09	-0.3314	-0.327	2.33e-14	GWAS; LD-GWAS	Blood metabolite ratios; Urinary metabolites (H-NMR features); Coronary artery disease or ischemic stroke; Coronary artery disease or large artery stroke; Red blood cell traits; Liver enzyme levels (alkaline phosphatase); Coronary heart disease; Soluble levels of adhesion molecules; Soluble E-selectin levels	24816252; 24586186; 24262325; 24262325; 23222517; 22001757; 21378990; 20167578; 19729612	up
CDH1	16	rs414299	19	49155758	0.489	0.481952	1.37e-08	8.21e-07	0.3295	0.2146	8.9e-14	unique			int
CDH1	16	rs281393	19	49224484	0.352	0.322667	3.11e-08	1.44e-06	0.3378	0.2328	3.39e-13	unique			int
CDH1	16	rs1236093	19	49104308	0.395	0.402	2.07e-07	2.26e-06	-0.3031	-0.2131	2.88e-12	unique			3'
CDH1	16	rs411482	19	49103447	0.395	0.401333	2.44e-07	2.19e-06	-0.3031	-0.213	3.23e-12	unique			down
CDH1	16	rs8103121	19	49158138	0.339	0.343333	7.97e-07	1.69e-06	0.298	0.2152	7.02e-12	unique			int
CDH1	16	rs8111500	19	49152955	0.382	0.382	4.14e-07	3.56e-06	0.2975	0.2044	8.68e-12	GWAS	Elevated serum carcinoembryonic antigen levels	24941225	int
CDH1	16	rs368654	19	49116555	0.298	0.307333	1.25e-06	4.02e-06	-0.307	-0.2167	2.63e-11	unique			syn
CDH1	16	rs8106205	19	49250197	0.461	0.436667	0.000108	2.07e-07	0.2241	0.2327	1.09e-10	LD-GWAS			up
CDH1	16	rs2307019	19	49244220	0.442	0.409333	5.4e-05	4.6e-07	0.2329	0.2292	1.11e-10	unique			mis
CDH1	16	rs371690	19	49166875	0.339	0.335333	3.49e-05	1.06e-06	0.2476	0.2228	1.59e-10	unique
CDH1	16	rs8104897	19	49249814	0.442	0.41	8.95e-05	6.32e-07	0.2264	0.2259	2.51e-10	LD-GWAS			5'
CDH1	16	rs8102032	19	49249795	0.442	0.41	9.13e-05	6.32e-07	0.2256	0.2259	2.57e-10	LD-GWAS			5'
CDH1	16	rs8105137	19	49249888	0.442	0.41	9.13e-05	6.32e-07	0.2256	0.2259	2.57e-10	LD-GWAS			5'
CDH1	16	rs8108468	19	49247786	0.442	0.409333	8.28e-05	7.48e-07	0.2274	0.2249	2.72e-10	LD-GWAS			syn
CDH1	16	rs8108136	19	49247693	0.443	0.410667	0.0001	7.6e-07	0.2253	0.224	3.36e-10	LD-GWAS			int
CDH1	16	rs558240	9	136157133	0.412	0.387183	3.07e-05	6.09e-06	-0.2321	-0.1984	7.76e-10	unique			inter
CSTB	21	rs1041456	21	45206355	0.426	0.424566	1.47e-14	1.09e-28	-0.4137	-0.4323	2.43e-41	unique			up
CSTB	21	rs2838378	21	45217559	0.426	0.423899	2.83e-14	5.58e-28	-0.4098	-0.4288	2.25e-40	unique			syn
CSTB	21	rs9985006	21	45232322	0.431	0.431909	1.29e-13	7.93e-29	-0.3977	-0.4359	2.27e-40	unique
CSTB	21	rs731935	21	45220570	0.427	0.426569	2.83e-14	1.01e-27	-0.4098	-0.427	3.83e-40	unique			int
CSTB	21	rs2329577	21	45227299	0.429	0.430667	5.66e-14	6.95e-28	-0.406	-0.4281	6.03e-40	unique			int
CSTB	21	rs762408	21	45223997	0.43	0.430667	5.66e-14	6.95e-28	-0.406	-0.4281	6.03e-40	unique			3'
CSTB	21	rs2838371	21	45215046	0.426	0.418133	5.69e-15	1.42e-26	-0.4139	-0.4194	7.4e-40	unique			int
CSTB	21	rs2838367	21	45214581	0.343	0.346462	1.07e-14	7.25e-26	-0.4332	-0.4247	6.23e-39	unique			int
CSTB	21	rs13052408	21	45205857	0.191	0.19	1.01e-14	3.71e-24	-0.5013	-0.4881	2.29e-37	unique			up
CSTB	21	rs6518323	21	45226304	0.194	0.193591	2.84e-14	5.79e-22	-0.4988	-0.4619	8.03e-35	unique
CSTB	21	rs2838363	21	45191139	0.497	0.484	9.7e-12	4.06e-20	0.3685	-0.3588	2.29e-30	unique			down
CSTB	21	rs1573338	21	45250839	0.201	0.204667	2.09e-09	2.09e-15	-0.3926	-0.3741	1.84e-23	unique			inter
CSTB	21	rs3761385	21	45198355	0.304	0.31	1.52e-06	4.58e-16	-0.2723	-0.3366	9.55e-21	unique			up
CSTB	21	rs2838416	21	45252838	0.386	0.394667	5.87e-07	8.32e-14	-0.2751	-0.2942	2.8e-19	unique			inter
CSTB	21	rs13050307	21	45153751	0.166	0.144	1.35e-06	1.11e-13	-0.343	-0.4248	9.5e-19	unique			int
CSTB	21	rs2276528	21	45152500	0.142	0.124	4.38e-05	4.81e-10	-0.306	-0.3783	1.72e-13	unique			mis
CSTB	21	rs4819314	21	45199738	0.118	0.11	2.3e-06	3.35e-08	-0.4063	-0.3664	3.68e-13	unique			up
CSTB	21	rs2838397	21	45237039	0.196	0.2	6.53e-06	8.1e-08	0.3077	0.2587	2.46e-12	unique			up
CSTB	21	rs2838404	21	45244752	0.206	0.213333	5.24e-05	1.03e-07	0.2651	0.2513	2.63e-11	unique			inter
CSTB	21	rs7527	21	45175958	0.484	0.482667	0.000266	1.83e-08	-0.1972	-0.221	3.36e-11	unique			3'
CSTB	21	rs17004606	21	45176621	0.127	0.116	5.85e-05	1.23e-07	-0.326	-0.3349	3.51e-11	unique			3'
CSTB	21	rs2838408	21	45246422	0.462	0.450667	0.00111	2.75e-09	0.1767	0.2362	3.77e-11	unique			inter
CSTB	21	rs2838411	21	45249474	0.387	0.373333	0.000928	1.22e-08	0.1823	0.2334	1.05e-10	unique			inter
CSTB	21	rs11089102	21	45258047	0.291	0.294	6.24e-05	1.83e-06	-0.2392	-0.2033	4.78e-10	unique			inter
CXCL5	4	rs425535	4	74863997	0.12	0.123333	1.52e-06	9.77e-31	0.3968	0.8238	1.66e-32	unique			syn
CXCL5	4	rs2437285	4	74860238	0.123	0.128	1.54e-06	2.32e-28	0.3958	0.784	1.15e-30	unique			down
CXCL5	4	rs352010	4	74855231	0.117	0.119333	9.9e-06	1.28e-29	0.3734	0.801	2.39e-30	unique			up
CXCL5	4	rs183028	4	74851918	0.117	0.120667	1.29e-05	4.96e-28	0.3608	0.7541	5.61e-29	unique			up
CXCL5	4	rs2472649	4	74857708	0.175	0.181333	5.23e-07	5.27e-20	0.3643	0.5663	1.2e-24	GWAS	Inflammatory bowel disease	23128233	up
CXCL5	4	rs4694656	4	74811199	0.116	0.116667	4.48e-05	1.83e-22	0.3272	0.7176	7.39e-24	unique			up
CXCL5	4	rs352018	4	74805322	0.113	0.114667	3.38e-05	7.1e-22	0.3334	0.7159	1.36e-23	unique			up
CXCL5	4	rs352024	4	74797139	0.113	0.114667	3.79e-05	7.1e-22	0.3323	0.7159	1.62e-23	unique			inter
CXCL5	4	rs487834	4	74795131	0.114	0.115333	3.79e-05	1.67e-21	0.3323	0.7083	3.14e-23	unique			inter
CXCL5	4	rs4694180	4	74837402	0.185	0.188	9.67e-06	7.3e-17	0.3107	0.5073	2.22e-20	unique			inter
CXCL5	4	rs1595009	4	74834656	0.186	0.19	1.51e-05	1.14e-16	0.3036	0.4992	5.82e-20	unique			inter
CXCL5	4	rs10938105	4	74826087	0.187	0.19	2.33e-05	2.3e-16	0.2963	0.4965	1.84e-19	unique			inter
CXCL5	4	rs4694655	4	74806082	0.192	0.196929	3.08e-05	1.91e-15	0.2934	0.4749	1.49e-18	unique			up
CXCL5	4	rs13122604	4	74785503	0.167	0.168667	5.05e-05	2.35e-15	0.2915	0.4959	3.45e-18	unique			inter
F7	13	rs10665	13	113752831	0.126	0.122	1.51e-11	2.39e-16	-0.5427	-0.5965	1.3e-26	GWAS; LD-GWAS	Crohns disease	18587394	3'
F7	13	rs6042	13	113770068	0.126	0.123333	1.61e-12	2.87e-15	-0.5748	-0.5726	1.56e-26	LD-GWAS			syn
F7	13	rs1755685	13	113757192	0.127	0.122667	1.46e-11	9.87e-16	-0.5383	-0.5841	4.98e-26	LD-GWAS			up
F7	13	rs3093233	13	113758130	0.128	0.122667	1.53e-11	9.87e-16	-0.5378	-0.5841	5.22e-26	LD-GWAS			up
F7	13	rs6046	13	113773159	0.117	0.113333	2.64e-11	9.59e-15	-0.5757	-0.5892	8.32e-25	LD-GWAS			mis
F7	13	rs3093253	13	113774092	0.116	0.112667	3.22e-11	1.78e-14	-0.5714	-0.5845	1.87e-24	LD-GWAS			3'
F7	13	rs556694	13	113780041	0.108	0.0966667	5.79e-09	7.72e-12	-0.5147	-0.5642	1.31e-19	unique			int
F7	13	rs555212	13	113756540	0.223	0.249333	8.93e-05	3.59e-09	0.2702	0.3382	2.29e-12	GWAS	End-stage coagulation	23381943	up
F7	13	rs776906	13	113784588	0.143	0.131333	4.54e-05	5.21e-08	-0.3169	-0.3985	1.21e-11	LD-GWAS
F7	13	rs2480946	13	113784720	0.14	0.130667	5.02e-05	1.87e-07	-0.3178	-0.3816	4.42e-11	LD-GWAS			int
F7	13	rs7327099	13	113748690	0.197	0.210948	7.49e-05	3.72e-07	-0.2737	-0.3063	1.27e-10	unique
F7	13	rs2146752	13	113749475	0.3	0.304667	2.48e-05	1.69e-06	-0.2574	-0.2532	1.77e-10	unique			3'
FAS	10	rs687289	9	136137106	0.347	0.312	0.0604	5.65e-29	0.1078	0.5283	3.87e-22	GWAS; LD-GWAS	Urinary metabolites (H-NMR features); Coagulation factor levels	24586186; 23267103	int
FAS	10	rs657152	9	136139265	0.372	0.333111	0.0246	8.3e-25	0.1276	0.4831	2.09e-20	GWAS; LD-GWAS	Urinary metabolites (H-NMR features); Serum alkaline phosphatase levels; Thyroid hormone levels; Obesity-related traits; Phytosterol levels; Liver enzyme levels	24586186; 24094242; 23408906; 23251661; 20529992; 18940312	int
FAS	10	rs507666	9	136149399	0.2	0.176	0.0547	1.74e-24	0.1307	0.6187	2.42e-19	GWAS; LD-GWAS	Lipid traits; Soluble ICAM-1	24386095; 21533024; 18604267	int
FAS	10	rs579459	9	136154168	0.225	0.198667	0.0223	7.42e-20	0.1474	0.536	3.69e-17	GWAS; LD-GWAS	Blood metabolite ratios; Urinary metabolites (H-NMR features); Coronary artery disease or ischemic stroke; Coronary artery disease or large artery stroke; Red blood cell traits; Liver enzyme levels (alkaline phosphatase); Coronary heart disease; Soluble levels of adhesion molecules; Soluble E-selectin levels	24816252; 24586186; 24262325; 24262325; 23222517; 22001757; 21378990; 20167578; 19729612	up
FAS	10	rs633862	9	136155444	0.455	0.483333	0.972	9.42e-18	0.001931	-0.3873	1.57e-10	unique			up
FAS	10	rs630014	9	136149722	0.474	0.492667	0.0263	2.05e-10	-0.1213	0.287	4.63e-10	unique			int
GC	4	rs7041	4	72618334	0.437	0.418667	1.27e-180	3.5e-213	-1.221	-1.166	0	GWAS	Serum vitamin D-binding protein levels	24740207	mis
GC	4	rs705119	4	72613036	0.422	0.408	1.39e-161	1.33e-194	-1.196	-1.147	0	LD-GWAS			int
GC	4	rs222047	4	72610208	0.437	0.419333	6.41e-178	1.05e-204	-1.219	-1.153	0	LD-GWAS			int
GC	4	rs705120	4	72614140	0.417	0.403872	6.25e-161	1.2e-189	-1.2	-1.141	0	LD-GWAS			int
GC	4	rs4588	4	72618323	0.285	0.28	4.78e-78	1.78e-106	-1.036	-1.037	8.83e-183	LD-GWAS			mis
GC	4	rs2282679	4	72608383	0.284	0.278667	8.17e-74	2.54e-102	-1.02	-1.022	2.22e-174	GWAS	Vitamin D levels; Vitamin D insufficiency	22673963; 20541252; 20418485	int
GC	4	rs6837549	4	72596821	0.493	0.482	8.2e-56	6.44e-77	0.8557	-0.8077	4.62e-131	unique			inter
GC	4	rs12512631	4	72601331	0.351	0.366	8.62e-46	9.38e-62	0.7922	0.758	5.9e-106	unique			inter
GC	4	rs1526692	4	72578724	0.405	0.378	7.44e-40	1.51e-50	-0.7584	-0.6845	7.05e-89	unique			inter
GC	4	rs4694105	4	72592214	0.325	0.316667	2.98e-30	2.19e-39	-0.683	-0.6365	3.62e-68	unique			inter
GC	4	rs11939173	4	72672158	0.465	0.471333	1.4e-34	4.43e-34	-0.649	-0.5684	6.21e-67	unique			up
GC	4	rs377687	4	72569065	0.344	0.360667	1.4e-24	1.22e-42	0.5972	0.6609	2.45e-65	unique			inter
GC	4	rs842872	4	72695059	0.484	0.490667	4.01e-31	4.11e-27	-0.6168	-0.5047	2.65e-56	unique			inter
GC	4	rs13113067	4	72739098	0.344	0.342	1.74e-21	2.3e-29	-0.5537	-0.5683	1.95e-49	unique			inter
GC	4	rs1520497	4	72800493	0.492	0.489319	1.41e-22	3.62e-20	-0.5396	-0.4269	4.51e-41	unique			inter
GC	4	rs705117	4	72608115	0.152	0.140667	7.18e-18	1.18e-20	-0.678	-0.6674	3.56e-37	GWAS	Serum vitamin D-binding protein levels	24740207	int
GC	4	rs10033936	4	72743474	0.256	0.241333	2.13e-17	2.2e-20	-0.5312	-0.5368	1.92e-36	unique			inter
GC	4	rs4694440	4	72756782	0.257	0.240667	2.04e-17	3.23e-20	-0.5299	-0.5387	2.71e-36	unique			inter
GC	4	rs962227	4	72707517	0.277	0.29	8.5e-16	3.67e-20	-0.4957	-0.4831	1.21e-34	unique			inter
GC	4	rs11726886	4	72822599	0.291	0.284667	1.04e-13	1.65e-17	-0.4695	-0.4572	6.2e-30	unique			inter
GC	4	rs970649	4	73096168	0.337	0.334667	1.02e-14	3.15e-16	-0.4559	-0.4145	1.23e-29	unique			inter
GC	4	rs957045	4	73075994	0.337	0.334	1.02e-14	3.68e-16	-0.4559	-0.4134	1.45e-29	unique			inter
GC	4	rs10938012	4	73096392	0.323	0.32	5.86e-14	3.68e-15	-0.4442	-0.401	8.16e-28	unique			inter
GC	4	rs10029245	4	73091934	0.323	0.319333	5.86e-14	6.55e-15	-0.4442	-0.3985	1.47e-27	unique			inter
GC	4	rs7662481	4	73088582	0.341	0.344667	2.17e-14	1.65e-14	-0.4498	-0.3885	1.51e-27	unique			inter
GC	4	rs962226	4	72707400	0.484	0.49	5.07e-15	1.21e-13	-0.4413	0.3429	3.31e-27	unique			inter
GC	4	rs12639968	4	72712872	0.189	0.188667	1.78e-13	3.12e-13	-0.5105	-0.4604	2.33e-25	unique			inter
GC	4	rs7681566	4	72709580	0.189	0.188251	4.88e-13	2.21e-13	-0.4997	-0.4638	4.14e-25	unique			inter
GC	4	rs10805048	4	73073061	0.316	0.313333	4.77e-12	4.25e-14	-0.4157	-0.3875	6.75e-25	unique			inter
GC	4	rs11737702	4	72689926	0.209	0.189333	1.39e-15	6.25e-11	0.5672	0.4028	1.09e-24	unique			up
GC	4	rs17775363	4	73036901	0.316	0.312	2.63e-11	8.84e-14	-0.4031	-0.3821	7.46e-24	unique			inter
GC	4	rs1973750	4	72797923	0.42	0.409333	1.48e-13	4.91e-11	-0.4247	-0.317	4.59e-23	unique			inter
GC	4	rs1491709	4	72613566	0.0742	0.0806667	1.03e-11	1.69e-11	-0.7099	-0.6216	6.57e-22	unique			int
GC	4	rs12504562	4	72784005	0.244	0.223333	1.09e-14	4.93e-08	0.5098	0.318	1.65e-20	unique			inter
GC	4	rs3733359	4	72649774	0.0638	0.0726667	2.5e-12	1.51e-08	-0.8037	-0.5294	3.29e-19	unique			splice
GC	4	rs9790741	4	73000885	0.316	0.3	1.98e-08	2.69e-11	-0.3436	-0.348	1.53e-18	unique			int
GC	4	rs4694441	4	72757529	0.276	0.298	3.97e-08	2.55e-11	0.3595	0.354	2.94e-18	unique			inter
GC	4	rs1520498	4	72699778	0.2	0.175567	6.11e-12	2.73e-07	0.4947	0.3283	2.04e-17	unique			inter
GC	4	rs6845026	4	72569693	0.15	0.158667	1.54e-09	6.57e-09	0.5055	0.3744	3.48e-17	unique			inter
GC	4	rs1520499	4	72791849	0.0735	0.0806667	5.25e-09	2.03e-08	-0.6867	-0.4932	6.66e-16	unique			inter
GC	4	rs7668997	4	72792132	0.0732	0.0790885	6.38e-09	3.43e-08	-0.6797	-0.4908	1.33e-15	unique			inter
GC	4	rs10022720	4	72743549	0.419	0.406667	4.41e-10	3.97e-07	0.3621	0.2603	2.22e-15	unique			inter
GC	4	rs16847227	4	72780146	0.0713	0.0786667	9.27e-09	3.74e-08	-0.6752	-0.488	2.22e-15	unique			inter
GC	4	rs1526691	4	72513178	0.136	0.140667	1.11e-07	1.71e-08	0.4754	0.3871	9.99e-15	unique			inter
GC	4	rs6837292	4	72704949	0.0845	0.0953333	8.27e-10	9.78e-07	-0.6561	-0.4131	1.02e-14	unique			inter
GC	4	rs6814839	4	72751722	0.0687	0.078	1.93e-07	1.45e-08	-0.6226	-0.5078	1.42e-14	unique			inter
GC	4	rs6845801	4	72730996	0.0698	0.0793333	2.56e-07	2.54e-08	-0.6176	-0.4917	3.26e-14	unique			inter
GC	4	rs222023	4	72637080	0.0515	0.0553333	2.96e-10	1.26e-05	-0.8173	-0.4736	9.5e-14	unique			int
GC	4	rs7675387	4	72921718	0.339	0.346	0.000267	2.94e-10	0.2274	0.3281	9.77e-13	unique			int
GC	4	rs7665177	4	73055314	0.0713	0.076	1.48e-06	2.05e-07	-0.5578	-0.4726	1.43e-12	unique			inter
GC	4	rs4364228	4	72623347	0.077	0.060241	1.84e-05	1.72e-08	-0.4906	-0.6069	1.65e-12	unique			int
GC	4	rs16847200	4	72751686	0.398	0.38251	2.47e-07	1.35e-06	0.3072	0.2525	1.92e-12	unique			inter
GC	4	rs222046	4	72610850	0.0713	0.052	5.03e-06	1.15e-07	-0.5378	-0.6062	2.68e-12	unique			int
GC	4	rs9291163	4	72699705	0.416	0.434	1.68e-07	3.2e-06	-0.2985	-0.2209	3.5e-12	unique			inter
GC	4	rs1352844	4	72647749	0.119	0.128667	1.39e-06	5.66e-07	0.4266	0.375	3.79e-12	unique			int
GC	4	rs10035034	4	72792667	0.262	0.286667	9.27e-05	4.77e-08	0.2554	0.2914	2.42e-11	unique			inter
GC	4	rs17774208	4	72801285	0.341	0.318667	4.48e-07	6.58e-05	-0.2974	-0.2112	2.38e-10	unique			inter
HGF	7	rs687289	9	136137106	0.347	0.312	0.00383	2.28e-52	0.1656	0.7384	9.9e-41	GWAS; LD-GWAS	Urinary metabolites (H-NMR features); Coagulation factor levels	24586186; 23267103	int
HGF	7	rs657152	9	136139265	0.372	0.333111	0.00556	5.39e-46	0.1572	0.6878	4.32e-36	GWAS; LD-GWAS	Urinary metabolites (H-NMR features); Serum alkaline phosphatase levels; Thyroid hormone levels; Obesity-related traits; Phytosterol levels; Liver enzyme levels	24586186; 24094242; 23408906; 23251661; 20529992; 18940312	int
HGF	7	rs507666	9	136149399	0.2	0.176	0.00271	6.74e-41	0.2035	0.8403	1.6e-33	GWAS; LD-GWAS	Lipid traits; Soluble ICAM-1	24386095; 21533024; 18604267	int
HGF	7	rs579459	9	136154168	0.225	0.198667	0.00727	8.47e-33	0.1728	0.7297	4.84e-27	GWAS; LD-GWAS	Blood metabolite ratios; Urinary metabolites (H-NMR features); Coronary artery disease or ischemic stroke; Coronary artery disease or large artery stroke; Red blood cell traits; Liver enzyme levels (alkaline phosphatase); Coronary heart disease; Soluble levels of adhesion molecules; Soluble E-selectin levels	24816252; 24586186; 24262325; 24262325; 23222517; 22001757; 21378990; 20167578; 19729612	up
HGF	7	rs633862	9	136155444	0.455	0.483333	0.552	3.39e-26	-0.03289	-0.5009	4.44e-17	unique			up
HGF	7	rs630014	9	136149722	0.474	0.492667	0.00929	9.52e-18	-0.1419	0.4066	4.44e-16	unique			int
HGF	7	rs8176746	9	136131322	0.0781	0.0786667	0.0184	5.14e-15	0.236	0.6786	1.17e-13	GWAS; LD-GWAS	Mean corpuscular hemoglobin concentration	20139978	mis
HGF	7	rs8176743	9	136131415	0.078	0.0787717	0.0205	4.89e-15	0.2321	0.6794	1.42e-13	GWAS; LD-GWAS	End-stage coagulation	23381943	mis
HGF	7	rs8176749	9	136131188	0.0781	0.0786667	0.0205	5.14e-15	0.2321	0.6786	1.46e-13	GWAS; LD-GWAS	Urinary metabolites (H-NMR features); Tumor biomarkers	24586186; 23300138	syn
HGF	7	rs4962153	9	136323754	0.158	0.150667	0.0464	1.1e-15	0.1508	0.5582	2.51e-13	GWAS	Liver enzyme levels	18940312	int
HGF	7	rs8176682	9	136139297	0.385	0.393717	0.0174	2.99e-14	-0.1384	-0.3699	3.87e-13	unique			int
HGF	7	rs7857390	9	136128546	0.386	0.393333	0.0202	5.01e-14	-0.1347	-0.3679	7.17e-13	unique
HGF	7	rs28602591	9	136246666	0.108	0.0993333	0.0143	1.02e-11	0.211	0.5587	1.88e-11	unique			int
HGF	7	rs11244079	9	136184526	0.0609	0.062	0.00857	4.5e-11	0.2836	0.648	2.52e-11	unique			up
HGF	7	rs28645493	9	136305738	0.101	0.0933333	0.0389	3.31e-12	0.1843	0.5878	4.65e-11	unique			int
HP	16	rs1424241	16	72078907	0.184	0.169333	1.59e-08	1.3e-11	0.4206	0.4348	6.05e-19	unique			int
HP	16	rs2074626	16	72139184	0.363	0.350936	7.6e-10	5.35e-09	-0.3738	-0.2905	1.47e-17	unique			syn
HP	16	rs1050362	16	72130815	0.363	0.351406	7.6e-10	5.45e-09	-0.3738	-0.2898	1.49e-17	unique			syn
HP	16	rs2240243	16	72137561	0.357	0.345382	1.32e-09	4.32e-09	-0.3687	-0.2916	1.92e-17	unique			syn
HP	16	rs6680	16	72146570	0.388	0.381333	1.41e-08	1.4e-07	-0.3373	-0.2556	1.33e-14	unique			3'
HP	16	rs1035559	16	72031860	0.398	0.378342	2.1e-09	1.3e-06	-0.348	-0.238	3.04e-14	unique			int
HP	16	rs11864453	16	72050480	0.396	0.373832	4.26e-08	6.94e-07	-0.3187	-0.2449	1.99e-13	unique
HP	16	rs7184169	16	72152933	0.247	0.239333	2.95e-07	3.48e-07	-0.3449	-0.287	5.45e-13	unique			int
HP	16	rs4788605	16	72154682	0.17	0.162667	1.04e-06	2.62e-07	0.3918	0.3442	1.31e-12	unique			int
HP	16	rs1820248	16	72039605	0.294	0.295728	8.27e-07	1.33e-06	0.3282	0.2593	5.67e-12	unique
HP	16	rs17604349	16	72210865	0.193	0.198264	9.69e-07	4.52e-06	0.3652	0.282	2.38e-11	unique			up
IL12B*	5	rs10045431	5	158814533	0.284	0.285333	3.97e-05	6.06e-07	-0.269722	-0.260601	1.05e-10	GWAS; LD-GWAS	Crohns disease	20570966	inter
IL16	15	rs1803275	15	81598416	0.0792	0.0853333	6.71e-31	3.46e-43	-1.171	-1.085	1.47e-72	unique			syn
IL16	15	rs11556218	15	81598269	0.0793	0.0853333	7.68e-31	3.46e-43	-1.171	-1.085	1.68e-72	unique			mis
IL16	15	rs4778636	15	81591639	0.0794	0.0853333	9.3e-31	3.46e-43	-1.172	-1.085	2.06e-72	unique			splice
IL16	15	rs11857713	15	81591265	0.0672	0.072	3.7e-25	2.4e-40	-1.132	-1.131	8.13e-64	unique			int
IL16	15	rs11073001	15	81592802	0.196	0.198	5.88e-10	1.41e-16	-0.4692	-0.4771	3.81e-25	unique			syn
IL16	15	rs4778640	15	81604131	0.0325	0.0366667	1.16e-10	1.89e-11	-1.054	-0.8305	7.01e-21	unique			3'
IL16	15	rs3848180	15	81596590	0.443	0.438667	0.000285	1.06e-15	-0.2107	-0.3698	2.03e-17	unique			int
IL18	11	rs7577696	2	32278782	0.413	0.400667	0.000401	3.51e-09	-0.2053	-0.2832	1.31e-11	GWAS	Inflammatory biomarkers	24182552	inter
IL18	11	rs7581340	2	32337391	0.409	0.391333	0.000647	2.54e-09	-0.1992	-0.2846	1.79e-11	LD-GWAS			int
IL18	11	rs3769604	2	32322495	0.413	0.398	0.000513	6.31e-09	-0.2019	-0.2784	2.92e-11	LD-GWAS			int
IL18	11	rs2365555	2	32280699	0.401	0.383845	0.000688	9.51e-09	-0.2004	-0.277	5.91e-11	LD-GWAS			inter
IL18	11	rs34197800	2	32389646	0.282	0.272667	0.00029	2.27e-07	-0.2335	-0.2779	3.45e-10	unique			up
IL18	11	rs11691939	2	32339561	0.282	0.272	0.000357	3.63e-07	-0.2298	-0.2742	6.62e-10	unique			int
IL23A*	12	rs10665	13	113752831	0.126	0.122	0.000275	2.73e-07	-0.465	-0.385	3.84e-10	GWAS; LD-GWAS	End-stage coagulation	23381943	3'
IL2RA	10	rs12722489	10	6102012	0.157	0.139333	4.91e-07	8.21e-15	-0.3883	-0.4172	2.95e-20	GWAS; LD-GWAS	Multiple sclerosis; Crohns disease;	22190364; 21102463; 17660530	int
IL2RA	10	rs2104286	10	6099045	0.264	0.251333	5.89e-07	1.04e-14	-0.3171	-0.3327	4.48e-20	GWAS	Rheumatoid arthritis; multiple sclerosis	24449572; 19525955; 19525953	int
IL2RA	10	rs7900744	10	6065611	0.212	0.191333	1.18e-06	2.3e-14	-0.3392	-0.3665	2.03e-19	unique			int
IL2RA	10	rs12722561	10	6069893	0.155	0.14	1.19e-07	6.11e-13	-0.4121	-0.3832	2.83e-19	LD-GWAS			int
IL2RA	10	rs3750671	10	6182423	0.33	0.298667	2.36e-07	1.1e-12	-0.3244	-0.3016	1.02e-18	unique			up
IL2RA	10	rs12722527	10	6077328	0.157	0.140667	4.45e-07	5.57e-13	-0.3897	-0.3834	1.12e-18	LD-GWAS			int
IL2RA	10	rs17147986	10	6038478	0.162	0.148667	3.92e-07	8.38e-13	-0.3934	-0.3762	1.4e-18	unique			inter
IL2RA	10	rs4749955	10	6118966	0.443	0.431333	0.000187	2.01e-16	-0.2178	-0.3193	3.06e-18	unique			inter
IL2RA	10	rs11594656	10	6122009	0.258	0.277704	0.000267	8.35e-16	0.2376	0.3497	1.59e-17	unique			inter
IL2RA	10	rs11256933	10	6173465	0.319	0.293333	1.21e-06	2.31e-11	-0.306	-0.2861	2.22e-16	unique			inter
IL2RA	10	rs7898880	10	6037553	0.232	0.238	7.13e-07	1.62e-10	0.3198	0.2866	6.66e-16	unique			inter
IL2RA	10	rs7905816	10	6169272	0.3	0.269333	5.99e-06	2.64e-11	-0.291	-0.2888	1.33e-15	unique			inter
IL2RA	10	rs11598494	10	6178941	0.356	0.39	1.39e-05	4.13e-11	0.2589	0.2649	5.33e-15	unique			inter
IL2RA	10	rs7090512	10	6110829	0.314	0.338667	0.000201	3.85e-12	0.2308	0.2844	1.8e-14	GWAS	Multiple sclerosis	21833088	down
IL2RA	10	rs6602398	10	6082953	0.322	0.330667	2.12e-06	1.87e-09	0.2813	0.2523	2.13e-14	unique			int
IL2RA	10	rs1983890	10	6178614	0.392	0.424	0.000128	1.89e-10	0.2222	0.2529	2.71e-13	unique			inter
IL2RA	10	rs3763700	10	6181709	0.387	0.421228	0.000335	1.52e-10	0.2101	0.2534	7.5e-13	unique			inter
IL2RA	10	rs2256774	10	6097165	0.36	0.375167	0.00324	1.16e-11	0.1755	0.2737	2.08e-12	unique			int
IL2RA	10	rs6602437	10	6130077	0.44	0.457333	0.00036	1.81e-09	0.2094	0.236	6.56e-12	unique			up
IL2RA	10	rs9663421	10	6055604	0.279	0.284667	1.02e-05	1.52e-07	0.272	0.223	7.08e-12	unique			int
IL2RA	10	rs3930531	10	6143619	0.382	0.402667	0.0014	3.28e-10	0.1866	0.254	9.02e-12	unique			int
IL2RA	10	rs6602450	10	6153297	0.315	0.336	0.0024	3.57e-10	0.1795	0.2638	2e-11	unique			int
IL2RA	10	rs10795763	10	6096199	0.411	0.433333	0.00105	1.52e-09	0.1933	0.2345	2.17e-11	unique			int
IL2RA	10	rs1073646	10	6164310	0.31	0.333333	0.00672	2.2e-09	0.1634	0.2489	3.52e-10	unique			down
IL2RA	10	rs4749926	10	6085312	0.387	0.406	0.000259	2.7e-07	0.2109	0.2018	3.57e-10	unique			int
IL2RA	10	rs7910961	10	6077796	0.343	0.343333	1.04e-05	1.12e-05	0.2556	0.1823	5.21e-10	unique			int
IL6R	1	rs8192284	1	154426970	0.4	0.404667	4.21e-90	1.58e-105	1.023	0.9824	7.55e-194	GWAS	Fibrinogen; C-reactive protein	20031577; 18439548
IL6R	1	rs4129267	1	154426264	0.4	0.404667	1.31e-88	1.58e-105	1.016	0.9824	2.18e-192	GWAS; LD-GWAS	Fibrinogen; Asthma; C-reactive protein; Protein quantitative trait loci; Pulmonary function	23969696; 21907864; 21300955; 18464913; 17903307	int
IL6R	1	rs4537545	1	154418879	0.413	0.414667	2.69e-75	2.58e-100	0.9616	0.9646	6.39e-174	GWAS; LD-GWAS	C-reactive protein	19567438	int
IL6R	1	rs7518199	1	154407419	0.407	0.408	4.75e-74	2.43e-92	0.9419	0.9425	9.97e-165	LD-GWAS			int
IL6R	1	rs4845625	1	154422067	0.418	0.41	7.54e-58	1.08e-75	-0.8489	-0.846	6.26e-132	unique			int
IL6R	1	rs4845618	1	154400015	0.429	0.428667	8.39e-56	3.12e-65	-0.8344	-0.8053	2.15e-119	unique			int
IL6R	1	rs7553796	1	154404406	0.413	0.411765	3.58e-50	1.51e-68	-0.794	-0.8221	4.27e-117	unique			int
IL6R	1	rs4240872	1	154436195	0.236	0.227333	1.29e-18	1.69e-25	-0.5825	-0.6036	9.83e-43	unique			int
IL6R	1	rs12750774	1	154516477	0.3	0.313752	2.25e-16	1.5e-22	0.4889	0.5109	1.43e-37	unique			mis
IL6R	1	rs11265622	1	154451420	0.372	0.367824	1.41e-14	1.1e-19	-0.4373	-0.4648	6.04e-33	unique			int
IL6R	1	rs12568083	1	154455949	0.373	0.368491	1.41e-14	1.24e-19	-0.4373	-0.4645	6.79e-33	unique			3'
IL6R	1	rs5018567	1	154480318	0.372	0.366489	2.57e-14	1.33e-19	-0.4341	-0.4647	1.33e-32	unique			int
IL6R	1	rs12044132	1	154462360	0.163	0.156	1.07e-15	3.62e-18	0.6349	0.5818	1.51e-32	unique			int
IL6R	1	rs4072391	1	154438880	0.188	0.182667	8.8e-12	6.37e-22	-0.4893	-0.6126	4.46e-32	LD-GWAS			3'
IL6R	1	rs2229238	1	154437896	0.189	0.184667	6.55e-12	1.13e-21	-0.4905	-0.605	5.41e-32	GWAS	Coronary heart disease	22319020	3'
IL6R	1	rs7514452	1	154438084	0.189	0.184667	6.55e-12	1.13e-21	-0.4905	-0.605	5.41e-32	LD-GWAS			3'
IL6R	1	rs10047079	1	154468135	0.201	0.190921	1.51e-14	1.13e-18	-0.5389	-0.5577	6.37e-32	LD-GWAS			int
IL6R	1	rs6674171	1	154491683	0.201	0.190667	1.51e-14	1.28e-18	-0.5389	-0.5563	7.18e-32	LD-GWAS			int
IL6R	1	rs3811448	1	154516578	0.2	0.189333	1.87e-14	1.89e-18	-0.5373	-0.5538	1.3e-31	LD-GWAS			mis
IL6R	1	rs10796927	1	154630498	0.273	0.272	1.58e-07	5.41e-11	0.3316	0.3577	2.49e-17	unique			inter
IL6R	1	rs9427108	1	154607914	0.438	0.445333	1.71e-06	8.56e-07	0.2602	0.2422	7.02e-12	unique			inter
IL6R	1	rs3811450	1	154551032	0.0696	0.0753333	8.25e-08	1.2e-05	-0.5922	-0.4258	8.41e-12	unique			3'
IL6R	1	rs7547072	1	154639255	0.5	0.498	3.3e-06	1.78e-06	0.2635	-0.2305	2.75e-11	unique			inter
IL6R	1	rs2335230	1	154589628	0.214	0.203333	0.000135	1.59e-07	-0.2786	-0.3223	1.08e-10	unique			int
IL6R	1	rs9426830	1	154594690	0.478	0.476667	1.96e-06	4.4e-05	0.2572	0.2016	5.29e-10	unique			int
IL6R	1	rs6699825	1	154582970	0.478	0.478	2.48e-06	5.03e-05	0.254	0.2005	7.48e-10	unique
LPA	6	rs9457925	6	160848743	0.0176	0.0186667	0.00365	5.74e-18	0.6919	1.614	2.41e-17	LD-GWAS			int
LPA	6	rs2063347	6	160882029	0.365	0.340667	0.00272	2.81e-14	0.1827	0.4	1.6e-14	LD-GWAS			int
LPA	6	rs2292334	6	160858188	0.361	0.339786	0.00184	8.7e-14	0.1894	0.3957	2.07e-14	LD-GWAS			syn
LPA	6	rs1810126	6	160872151	0.36	0.338451	0.0022	7.92e-14	0.1868	0.3954	2.53e-14	LD-GWAS			3'
LPA	6	rs2048327	6	160863532	0.36	0.337333	0.00197	1.02e-13	0.1888	0.3942	2.58e-14	LD-GWAS			int
LPA	6	rs3918286	6	160868668	0.359	0.337333	0.00229	1.02e-13	0.186	0.3942	3.24e-14	LD-GWAS			int
LPA	6	rs11751605	6	160963230	0.145	0.138	1.92e-05	7.12e-09	0.3505	0.411	7.65e-13	unique			int
LPA	6	rs783147	6	161137990	0.45	0.454667	0.00898	2.85e-12	-0.1519	-0.3569	3.42e-12	GWAS	Lp (a) levels	21900290	int
LPA	6	rs3120137	6	160771192	0.141	0.136667	0.000678	2.4e-09	0.2801	0.4243	1.81e-11	unique			int
LPA	6	rs9346816	6	160782662	0.481	0.455333	0.0108	6.66e-11	0.148	0.3325	4.84e-11	unique			int
LPA	6	rs4252050	6	161121958	0.193	0.191333	0.000144	6.48e-08	-0.2831	-0.3472	5.17e-11	unique			up
LPA	6	rs9364552	6	160782934	0.482	0.455941	0.0108	8.54e-11	0.148	0.3312	5.87e-11	unique			int
LPA	6	rs641990	6	160779134	0.481	0.453333	0.0106	1.07e-10	0.1487	0.3291	6.69e-11	unique			int
LPA	6	rs3106166	6	160838361	0.451	0.436	0.0456	6.01e-12	0.1165	0.3446	9.58e-11	unique			int
LPA	6	rs501470	6	160770918	0.497	0.472	0.0164	8.5e-10	-0.1414	0.3148	6.33e-10	unique			int
LPA	6	rs474513	6	160770312	0.497	0.473262	0.0164	9.82e-10	-0.1414	0.3148	7.13e-10	unique			int
LPA	6	rs539298	6	160770360	0.496	0.473262	0.0164	9.82e-10	-0.1414	0.3148	7.13e-10	unique			int
LPA	6	rs487152	6	160774486	0.496	0.47263	0.0165	1.09e-09	-0.1414	0.3134	7.63e-10	unique			int
LPA	6	rs675162	6	160776325	0.498	0.467914	0.016	1.15e-09	0.1412	0.312	7.68e-10	unique			int
LTF	3	rs11707471	3	46498865	0.313	0.320427	1.37e-40	1.71e-39	0.7694	0.6176	3.05e-78	unique			int
LTF	3	rs1126478	3	46501213	0.313	0.319333	1.73e-40	4.95e-39	0.7618	0.6152	1.22e-77	unique			mis
LTF	3	rs3828477	3	46483717	0.244	0.23765	4.24e-32	2.05e-25	0.7298	0.5508	2.65e-55	unique			int
LTF	3	rs1126477	3	46501268	0.24	0.252	7.91e-20	2.46e-24	0.6207	0.5305	8.44e-43	unique			mis
LTF	3	rs13070740	3	46503214	0.0709	0.0653333	2.94e-17	1.54e-10	0.9076	0.5908	1.3e-25	unique			int
LTF	3	rs17078876	3	46500978	0.155	0.145333	6.82e-13	1.25e-13	0.5841	0.4952	3.13e-25	unique			int
LTF	3	rs17078864	3	46498975	0.155	0.146667	7.52e-13	4.91e-13	0.5846	0.4825	1.43e-24	unique			int
LTF	3	rs4413345	3	46310921	0.249	0.224667	1.05e-07	1.04e-12	0.3562	0.4074	4.05e-19	unique			down
LTF	3	rs7652290	3	46299765	0.328	0.302	3.92e-08	1.06e-10	0.3466	0.3346	1.15e-17	unique			int
LTF	3	rs11713015	3	46573318	0.341	0.322667	2.03e-10	7.04e-08	0.3843	0.2687	2.22e-16	unique			int
LTF	3	rs9849400	3	46574256	0.342	0.323333	2.03e-10	7.16e-08	0.3843	0.2686	2.22e-16	unique			splice
LTF	3	rs2068099	3	46549304	0.175	0.168	8.85e-10	3.96e-06	0.4789	0.2887	5.53e-14	unique			inter
LTF	3	rs7430431	3	46541147	0.481	0.475333	1.1e-08	2.37e-06	-0.31	-0.225	2.43e-13	unique			int
LTF	3	rs4683236	3	46508524	0.222	0.230667	6.28e-09	1.31e-05	-0.4163	-0.2496	1.11e-12	unique			int
LTF	3	rs13093282	3	46565341	0.0758	0.0693333	2.6e-09	2.72e-05	0.6792	0.388	1.34e-12	unique			int
LTF	3	rs2856762	3	46413334	0.0835	0.0735294	2.17e-06	1.79e-07	0.4488	0.4752	1.81e-12	unique			int
LTF	3	rs17286758	3	46586622	0.0767	0.0686667	2.6e-09	5.08e-05	0.6792	0.3762	2.9e-12	unique			mis
LTF	3	rs7648827	3	46586179	0.0767	0.0686667	2.6e-09	5.08e-05	0.6792	0.3762	2.9e-12	unique			int
LTF	3	rs9838450	3	46123333	0.143	0.134	5.67e-07	1.17e-06	0.4038	0.3232	3.51e-12	unique			inter
LTF	3	rs4683235	3	46501931	0.0795	0.101333	0.000123	1.99e-08	0.4127	0.441	1.51e-11	unique			int
LTF	3	rs7645716	3	46336781	0.256	0.242	5.53e-05	9.96e-07	0.2818	0.2686	2.36e-10	LD-GWAS			inter
LTF	3	rs13079869	3	46008087	0.11	0.100667	1.31e-05	6.05e-06	0.3908	0.3456	3.44e-10	unique			syn
LTF	3	rs10510749	3	46180416	0.0775	0.0746667	2.06e-05	7.79e-06	0.4451	0.3858	6.84e-10	LD-GWAS			down
MICA*	6	rs2256175	6	31380449	0.466	0.484	9.71e-17	2.03e-19	-0.4904	-0.5063	7.92e-35	unique			int
MICA*	6	rs2523484	6	31353639	0.402	0.417333	1.03e-14	1.9e-14	-0.4609	-0.4412	8.84e-28	unique
MICA*	6	rs2596562	6	31354595	0.347	0.360667	1.26e-13	1.35e-10	-0.4706	-0.3893	1.23e-22	unique
MICA*	6	rs2844529	6	31353593	0.347	0.360667	1.26e-13	1.35e-10	-0.4706	-0.3893	1.23e-22	unique			up
MICA*	6	rs2428475	6	31366622	0.345	0.357333	6.23e-14	2.34e-10	-0.4774	-0.3845	1.24e-22	LD-GWAS
MICA*	6	rs2523475	6	31361710	0.345	0.357333	6.23e-14	2.34e-10	-0.4774	-0.3845	1.24e-22	LD-GWAS
MICA*	6	rs2596542	6	31366595	0.345	0.357143	6.82e-14	2.33e-10	-0.4764	-0.3843	1.34e-22	GWAS	Hepatocellular carcinoma	21499248	up
MICA*	6	rs2428486	6	31354104	0.347	0.360667	1.52e-13	1.35e-10	-0.4699	-0.3893	1.45e-22	unique			up
MICA*	6	rs2596531	6	31387557	0.444	0.43	1.96e-09	3.63e-14	0.3707	0.423	2.5e-22	LD-GWAS			int
MICA*	6	rs2844511	6	31389784	0.445	0.43	1.96e-09	3.63e-14	0.3707	0.423	2.5e-22	LD-GWAS			int
MICA*	6	rs2844521	6	31368964	0.345	0.358	6.23e-14	4.4e-10	-0.4774	-0.3789	2.55e-22	LD-GWAS
MICA*	6	rs2251731	6	31367365	0.345	0.356952	1.48e-13	2.62e-10	-0.4713	-0.3829	3e-22	LD-GWAS
MICA*	6	rs2596530	6	31387373	0.445	0.429907	2.49e-09	3.5e-14	0.367	0.4227	3.08e-22	LD-GWAS
MICA*	6	rs2523459	6	31365308	0.344	0.355299	7.1e-14	6.64e-10	-0.475	-0.3744	4.46e-22	LD-GWAS
MICA*	6	rs2516448	6	31390410	0.444	0.429333	1.94e-09	8.29e-14	0.3703	0.416	5.42e-22	GWAS; LD-GWAS	Cervical cancer	23482656	int
MICA*	6	rs2244020	6	31347451	0.376	0.387671	1.29e-12	2.07e-09	-0.4677	-0.3512	1.91e-20	unique
MICA*	6	rs2523685	6	31426256	0.221	0.228	2.67e-10	5.76e-08	-0.4633	-0.3804	2.22e-16	unique			int
MICA*	6	rs7741091	6	31352631	0.318	0.323333	7.39e-08	2.03e-09	-0.3409	-0.3761	8.88e-16	unique
MICA*	6	rs9469007	6	31409024	0.302	0.314667	3.69e-08	3.99e-09	-0.3631	-0.3653	8.88e-16	unique			int
MICA*	6	rs7772549	6	31407643	0.302	0.315333	3.69e-08	5.43e-09	-0.3631	-0.362	1.11e-15	unique
MICA*	6	rs9266638	6	31347057	0.309	0.311333	2.43e-09	5.5e-08	-0.4113	-0.3229	1.11e-15	unique
MICA*	6	rs9501587	6	31346937	0.209	0.208	3.45e-11	5.46e-06	-0.5206	-0.3127	6.22e-15	unique
MICA*	6	rs1051794	6	31379109	0.288	0.299333	2.88e-07	1.4e-08	-0.3421	-0.362	2.02e-14	unique			mis
MICA*	6	rs9263871	6	31170528	0.345	0.366667	1.27e-09	1.53e-06	-0.4048	-0.2721	2.44e-14	GWAS	Lupus nephritis in systemic lupus erythematosus	24925725	syn
MICA*	6	rs9266845	6	31384792	0.258	0.259333	3.27e-06	8.05e-09	-0.3244	-0.3803	1.34e-13	unique
MICA*	6	rs1131904	6	31383071	0.258	0.262701	3.66e-06	4.63e-08	-0.3206	-0.3557	8.02e-13	unique
MICA*	6	rs9295993	6	31388595	0.259	0.26235	4.86e-06	4.14e-08	-0.3177	-0.3562	9.6e-13	unique
MICA*	6	rs6932236	6	31383979	0.258	0.262667	6e-06	3.86e-08	-0.315	-0.3571	1.11e-12	unique
MICA*	6	rs9263873	6	31170713	0.411	0.436	5.9e-07	4.67e-07	-0.317	-0.2738	1.4e-12	unique
MICA*	6	rs9366778	6	31269173	0.391	0.408545	6.23e-07	5.64e-07	-0.3216	-0.2848	1.78e-12	unique			int
MICA*	6	rs9380240	6	31268832	0.39	0.408545	6.23e-07	5.64e-07	-0.3216	-0.2848	1.78e-12	unique
MICA*	6	rs7751505	6	31360255	0.261	0.264667	3.04e-07	1.19e-06	-0.3562	-0.3317	2.03e-12	GWAS	Pubertal anthropometrics	23449627	down
MICA*	6	rs7751725	6	31360433	0.261	0.264667	3.04e-07	1.19e-06	-0.3562	-0.3317	2.03e-12	LD-GWAS			down
MICA*	6	rs3016014	6	31351153	0.265	0.248	1.1e-05	5.29e-08	0.292	0.3357	2.77e-12	unique
MICA*	6	rs13437088	6	31355119	0.263	0.268	4.76e-07	1.55e-06	-0.3493	-0.327	4.03e-12	LD-GWAS			inter
MICA*	6	rs4711268	6	31354504	0.263	0.268	4.91e-07	1.55e-06	-0.3482	-0.327	4.14e-12	LD-GWAS
MICA*	6	rs4711269	6	31354819	0.263	0.268	4.91e-07	1.55e-06	-0.3482	-0.327	4.14e-12	LD-GWAS			up
MICA*	6	rs13437082	6	31354560	0.263	0.268	5.04e-07	1.55e-06	-0.3489	-0.327	4.24e-12	GWAS	Height	19343178	up
MICA*	6	rs2256028	6	31379198	0.156	0.164667	5.61e-06	3.54e-07	-0.3968	-0.4008	8.96e-12	unique
MICA*	6	rs4713446	6	31162839	0.411	0.435333	1.24e-06	1.61e-06	-0.3079	-0.2589	9.98e-12	unique
MICA*	6	rs4713447	6	31162963	0.411	0.435333	1.24e-06	1.61e-06	-0.3079	-0.2589	9.98e-12	unique
MICA*	6	rs9501077	6	31167512	0.411	0.435333	1.24e-06	1.61e-06	-0.3079	-0.2589	9.98e-12	unique
MICA*	6	rs7762933	6	31162520	0.411	0.435247	1.24e-06	1.62e-06	-0.3079	-0.2594	1e-11	unique
MICA*	6	rs2523454	6	31367865	0.291	0.292667	1.51e-05	1.79e-07	0.2736	0.2996	1.23e-11	unique			5'
MICA*	6	rs28367646	6	31268332	0.297	0.308411	1.14e-05	3.49e-07	-0.3074	-0.3144	1.77e-11	LD-GWAS
MICA*	6	rs3094220	6	31082987	0.224	0.214	2.54e-05	1.51e-07	0.2957	0.3225	1.78e-11	unique			3'
MICA*	6	rs3132550	6	31086048	0.223	0.214	2.87e-05	1.51e-07	0.2939	0.3225	2.01e-11	unique
MICA*	6	rs2523457	6	31365707	0.299	0.301333	1.46e-05	3.46e-07	0.2706	0.2903	2.24e-11	unique
MICA*	6	rs9501109	6	31392118	0.219	0.227637	3.92e-08	5.09e-05	-0.4144	-0.2833	2.43e-11	unique
MICA*	6	rs9267084	6	31409605	0.14	0.132844	2.42e-06	2.19e-06	0.3777	0.3525	2.54e-11	unique
MICA*	6	rs9404982	6	31166539	0.41	0.434987	2.37e-06	2.52e-06	-0.3033	-0.2562	2.91e-11	unique
MICA*	6	rs7754443	6	31254263	0.292	0.301333	9.15e-06	1.36e-06	-0.3113	-0.2967	5.48e-11	unique
MICA*	6	rs9468920	6	31254936	0.291	0.301333	1.11e-05	1.36e-06	-0.3084	-0.2967	6.57e-11	unique
MICA*	6	rs3873379	6	31262169	0.291	0.301333	1.24e-05	1.36e-06	-0.3061	-0.2967	7.36e-11	unique			int
MICA*	6	rs3873380	6	31262438	0.301	0.311333	9.46e-06	1.79e-06	-0.3099	-0.2854	7.43e-11	unique			int
MICA*	6	rs9468935	6	31269553	0.286	0.296	2.4e-05	2.29e-06	-0.2998	-0.2919	2.32e-10	LD-GWAS
MICA*	6	rs9468914	6	31250606	0.331	0.345895	2.38e-05	4.25e-06	-0.2854	-0.2694	4.25e-10	unique
MICA*	6	rs28367832	6	31305731	0.483	0.498667	0.00178	3.15e-08	0.1955	0.3077	5.22e-10	unique
MICA*	6	rs4947314	6	31393374	0.18	0.179813	6.72e-06	1.88e-05	-0.3603	-0.3209	6.08e-10	unique
MICA*	6	rs3905495	6	31265539	0.332	0.345794	2.38e-05	6.43e-06	-0.2832	-0.2633	6.44e-10	unique
MMP3	11	rs645419	11	102716321	0.49	0.489333	3.95e-17	2.47e-31	0.4165	0.4612	1.19e-46	LD-GWAS			up
MMP3	11	rs679620	11	102713620	0.49	0.489987	3.95e-17	3.04e-31	0.4165	0.4614	1.44e-46	LD-GWAS			mis
MMP3	11	rs1010698	11	102701021	0.49	0.489333	8.22e-17	2.47e-31	0.4144	0.4612	2.65e-46	LD-GWAS			int
MMP3	11	rs1144397	11	102682285	0.408	0.416	8.91e-15	4.25e-24	0.3973	0.4101	2.28e-37	unique			int
MMP3	11	rs479095	11	102691894	0.266	0.272363	2.81e-12	7.29e-14	0.4005	0.3474	6.97e-25	LD-GWAS			int
MMP3	11	rs522616	11	102715048	0.208	0.218667	5.55e-12	2.8e-10	0.4258	0.3135	7.52e-21	unique			up
MMP3	11	rs1144393	11	102669409	0.387	0.382667	1.04e-06	7.95e-10	-0.2512	-0.2632	4.44e-15	unique			int
MMP3	11	rs10791599	11	102760015	0.34	0.351333	0.0182	1.26e-10	-0.1327	-0.268	1.77e-10	unique			inter
MMP3	11	rs615098	11	102720678	0.18	0.178667	0.00399	2.67e-09	0.1894	0.3166	1.98e-10	LD-GWAS			inter
MMP3	11	rs519806	11	102675489	0.41	0.428	0.00127	4.5e-08	0.1676	0.2289	4.63e-10	unique			int
NRCAM	7	rs10487851	7	107992582	0.298	0.298	6.8e-08	1.45e-07	0.3249	0.2565	5.68e-14	unique			int
NRCAM	7	rs2300033	7	108006941	0.314	0.314	3.25e-07	5.09e-07	0.305	0.2396	8.84e-13	unique			int
NRCAM	7	rs2267887	7	107968803	0.401	0.422	4.02e-05	3.11e-06	-0.2335	-0.2202	5.18e-10	unique			int
PECAM1	17	rs507666	9	136149399	0.2	0.176	1.99e-38	1.2e-23	-0.8452	-0.641	1.26e-58	GWAS; LD-GWAS	Lipid traits; Soluble ICAM-1	24386095; 21533024; 18604267	int
PECAM1	17	rs579459	9	136154168	0.225	0.198667	4.04e-35	6.18e-20	-0.7693	-0.5662	1.9e-51	GWAS; LD-GWAS	Blood metabolite ratios; Urinary metabolites (H-NMR features); Coronary artery disease or ischemic stroke; Coronary artery disease or large artery stroke; Red blood cell traits; Liver enzyme levels (alkaline phosphatase); Coronary heart disease; Soluble levels of adhesion molecules; Soluble E-selectin levels	24816252; 24586186; 24262325; 24262325; 23222517; 22001757; 21378990; 20167578; 19729612	up
PECAM1	17	rs558240	9	136157133	0.412	0.387183	2.66e-15	1.47e-10	-0.4302	-0.3098	5.09e-24	unique			inter
PECAM1	17	rs4962153	9	136323754	0.158	0.150667	1.53e-13	4.63e-10	-0.5622	-0.4346	5.78e-22	GWAS	Liver enzyme levels	18940312	int
PECAM1	17	rs28602591	9	136246666	0.108	0.0993333	2.5e-13	3.33e-10	-0.6352	-0.5134	6.08e-22	unique			int
PECAM1	17	rs28645493	9	136305738	0.101	0.0933333	4.96e-11	3.95e-10	-0.593	-0.5259	7.76e-20	unique			int
PECAM1	17	rs7503550	17	59800935	0.498	0.494667	2.49e-11	1.58e-07	-0.3797	-0.2522	3.41e-17	unique
PECAM1	17	rs687289	9	136137106	0.347	0.312	4.12e-11	2.26e-06	-0.3827	-0.244	2.44e-15	GWAS; LD-GWAS	Urinary metabolites (H-NMR features); Coagulation factor levels	24586186; 23267103	int
PECAM1	17	rs7873522	9	136131905	0.346	0.374	3.43e-06	1.79e-10	0.2728	0.3123	4e-15	LD-GWAS			int
PECAM1	17	rs2073824	9	136132633	0.346	0.374332	3.43e-06	4.19e-10	0.2728	0.3059	8.88e-15	LD-GWAS			int
PECAM1	17	rs657152	9	136139265	0.372	0.333111	2.85e-11	1.47e-05	-0.3816	-0.2206	1.89e-14	GWAS; LD-GWAS	Urinary metabolites (H-NMR features); Serum alkaline phosphatase levels; Thyroid hormone levels; Obesity-related traits; Phytosterol levels; Liver enzyme levels	24586186; 24094242; 23408906; 23251661; 20529992; 18940312	int
PECAM1	17	rs11244035	9	136081319	0.103	0.103079	1.59e-09	1.13e-06	-0.5579	-0.402	2.07e-14	unique			mis
PECAM1	17	rs8176743	9	136131415	0.078	0.0787717	1.12e-07	1.42e-06	0.5408	0.4203	1.01e-12	GWAS; LD-GWAS	End-stage coagulation	23381943	mis
PECAM1	17	rs8176749	9	136131188	0.0781	0.0786667	1.12e-07	1.59e-06	0.5408	0.4188	1.14e-12	GWAS; LD-GWAS	Urinary metabolites (H-NMR features); Tumor biomarkers	24586186; 23300138	syn
PECAM1	17	rs8176746	9	136131322	0.0781	0.0786667	1.13e-07	1.59e-06	0.5417	0.4188	1.16e-12	GWAS; LD-GWAS	Mean corpuscular hemoglobin concentration	20139978	mis
PECAM1	17	rs7030248	9	136155359	0.344	0.338667	3.83e-09	9.39e-05	0.3525	0.2031	8.5e-12	GWAS	Elevated serum carcinoembryonic antigen levels	24941225	up
PECAM1	17	rs8176722	9	136132754	0.102	0.0981308	5.61e-06	1.47e-06	0.4125	0.3827	3.7e-11	GWAS	Malaria	23717212	int
PECAM1	17	rs7853989	9	136131592	0.103	0.099466	4.57e-06	1.87e-06	0.4231	0.374	3.94e-11	LD-GWAS			mis
PECAM1	17	rs4246170	9	136112413	0.102	0.0973333	3.52e-06	2.04e-05	0.4334	0.3454	3.79e-10	unique			inter
SELE	1	rs507666	9	136149399	0.2	0.176	7.18e-46	4.31e-60	-0.8731	-0.9406	2.14e-104	GWAS; LD-GWAS	Lipid traits; Soluble ICAM-1	24386095; 21533024; 18604267	int
SELE	1	rs579459	9	136154168	0.225	0.198667	1.43e-38	1.01e-48	-0.7668	-0.8266	8.89e-86	GWAS; LD-GWAS	Blood metabolite ratios; Urinary metabolites (H-NMR features); Coronary artery disease or ischemic stroke; Coronary artery disease or large artery stroke; Red blood cell traits; Liver enzyme levels (alkaline phosphatase); Coronary heart disease; Soluble levels of adhesion molecules; Soluble E-selectin levels	24816252; 24586186; 24262325; 24262325; 23222517; 22001757; 21378990; 20167578; 19729612	up
SELE	1	rs687289	9	136137106	0.347	0.312	8.93e-27	1.76e-40	-0.5756	-0.6201	1.17e-65	GWAS; LD-GWAS	Urinary metabolites (H-NMR features); Coagulation factor levels	24586186; 23267103	int
SELE	1	rs657152	9	136139265	0.372	0.333111	7.49e-25	2.33e-36	-0.5493	-0.581	1.09e-59	GWAS; LD-GWAS	Urinary metabolites (H-NMR features); Serum alkaline phosphatase levels; Thyroid hormone levels; Obesity-related traits; Phytosterol levels; Liver enzyme levels	24586186; 24094242; 23408906; 23251661; 20529992; 18940312	int
SELE	1	rs633862	9	136155444	0.455	0.483333	2.53e-16	1.31e-21	0.4315	0.4291	1.34e-36	unique			up
SELE	1	rs4962153	9	136323754	0.158	0.150667	7.36e-15	1.4e-21	-0.5642	-0.6212	4.53e-35	GWAS	Liver enzyme levels	18940312	int
SELE	1	rs558240	9	136157133	0.412	0.387183	3.89e-19	9.52e-17	-0.4587	-0.3782	2.9e-34	unique			inter
SELE	1	rs11244035	9	136081319	0.103	0.103079	8.64e-13	8.18e-16	-0.6278	-0.6237	2.43e-27	unique			mis
SELE	1	rs28602591	9	136246666	0.108	0.0993333	4.23e-13	5.76e-15	-0.6011	-0.6019	8.58e-27	unique			int
SELE	1	rs630014	9	136149722	0.474	0.492667	1.95e-07	6.16e-20	0.2763	-0.4073	3.78e-25	unique			int
SELE	1	rs28645493	9	136305738	0.101	0.0933333	6.39e-11	7.56e-15	-0.5632	-0.6165	1.61e-24	unique			int
SELE	1	rs8176682	9	136139297	0.385	0.393717	1.72e-12	6.32e-08	0.3956	0.2517	1.28e-18	unique			int
SELE	1	rs7857390	9	136128546	0.386	0.393333	6.68e-12	1e-07	0.3837	0.2478	6.74e-18	unique
SELE	1	rs641959	9	136133699	0.268	0.296395	0.0002	4.9e-13	0.2217	0.3602	3.33e-15	unique			int
SELE	1	rs514708	9	136133743	0.268	0.296	0.000185	6.24e-13	0.2226	0.3583	3.77e-15	unique			int
SELE	1	rs672316	9	136138125	0.268	0.295333	0.000185	7.26e-13	0.2226	0.3572	4.22e-15	unique			int
SELE	1	rs8176717	9	136133034	0.243	0.274	0.000135	7.68e-12	0.2395	0.3504	1.95e-14	unique			int
SELE	1	rs574347	9	136135659	0.244	0.275333	0.00021	5.46e-12	0.2326	0.3517	2.58e-14	unique			int
SELE	1	rs568203	9	136151445	0.241	0.273031	0.000368	4.13e-12	0.2237	0.355	4.35e-14	unique			up
SELE	1	rs549446	9	136135238	0.244	0.275333	0.000315	5.46e-12	0.2257	0.3517	4.4e-14	unique			mis
SELE	1	rs8176732	9	136132303	0.243	0.274	0.000386	7.68e-12	0.2229	0.3504	7.66e-14	unique			int
SELE	1	rs474279	9	136139617	0.242	0.274	0.000388	8.87e-12	0.2238	0.3482	8.68e-14	unique			int
SELE	1	rs552148	9	136153481	0.247	0.278	0.000292	2e-11	0.2275	0.3419	1.17e-13	unique			up
SELE	1	rs688976	9	136136770	0.227	0.262	0.000467	5.76e-11	0.2193	0.3344	5.13e-13	unique			mis
SELE	1	rs7873522	9	136131905	0.346	0.374	2.75e-05	6.98e-08	0.2357	0.2518	9.34e-12	LD-GWAS			int
SELE	1	rs9411381	9	136156067	0.183	0.182667	1.33e-09	0.000232	0.4197	0.2165	1.22e-11	LD-GWAS			inter
SELE	1	rs2073824	9	136132633	0.346	0.374332	2.75e-05	1.25e-07	0.2357	0.2472	1.62e-11	LD-GWAS			int
SELE	1	rs8176694	9	136137646	0.183	0.21	0.00439	1.06e-10	0.2042	0.3661	1.8e-11	unique			int
SELE	1	rs512770	9	136133506	0.211	0.228	0.00219	4.58e-09	0.1977	0.32	1.38e-10	unique			mis
SERPINA1	14	rs4905179	14	94795492	0.212	0.204667	1.64e-07	1.93e-09	-0.357	-0.3568	1.55e-15	LD-GWAS			inter
SERPINA1	14	rs926144	14	94813402	0.217	0.212667	1.92e-07	5.44e-09	-0.3574	-0.3425	5.33e-15	LD-GWAS			inter
SERPINA1	14	rs998520	14	94554279	0.11	0.112667	6.64e-06	2.17e-05	-0.4107	-0.312	7e-10	unique
SFTPD	10	rs2146192	10	81715738	0.0995	0.114	1.63e-18	2.79e-20	-0.79	-0.6692	2.03e-37	unique			int
SFTPD	10	rs1885550	10	81712440	0.168	0.169333	8.25e-20	1.86e-17	-0.6352	-0.5284	1.22e-35	unique			int
SFTPD	10	rs10887199	10	81702834	0.102	0.118667	1.7e-17	3.07e-19	-0.7565	-0.6406	2.25e-35	unique			int
SFTPD	10	rs723192	10	81708013	0.104	0.121495	1.32e-17	2.48e-18	-0.7643	-0.6204	1.54e-34	unique			int
SFTPD	10	rs7084667	10	81748708	0.331	0.332	1.43e-12	7.02e-20	0.4085	0.4554	4.81e-31	unique			inter
SFTPD	10	rs10887328	10	81761401	0.359	0.356667	3.16e-09	1.95e-19	0.3382	0.4395	6.5e-27	unique			inter
SFTPD	10	rs4369337	10	81733742	0.0346	0.0386667	3.51e-12	3.37e-12	-1.144	-0.8033	4.46e-23	LD-GWAS			int
SFTPD	10	rs6413523	10	81706135	0.0361	0.0426667	5.89e-11	9.41e-11	-1.064	-0.7244	1.98e-20	LD-GWAS			int
SFTPD	10	rs10887336	10	81764081	0.193	0.209333	2.01e-07	1.72e-10	-0.3597	-0.3753	2.22e-16	unique			inter
SFTPD	10	rs1932571	10	81761489	0.191	0.208	2.11e-07	2.21e-10	-0.3592	-0.3733	2.22e-16	unique			inter
SFTPD	10	rs7905482	10	81863964	0.356	0.341333	1.75e-07	1.2e-10	0.3045	0.3154	2.22e-16	unique			inter
SFTPD	10	rs4357631	10	81754384	0.0629	0.066	1.84e-07	6.36e-10	-0.6256	-0.5813	6.66e-16	unique			inter
SFTPD	10	rs726289	10	81706951	0.0655	0.0761015	1.44e-08	9.21e-09	-0.6156	-0.5154	6.66e-16	unique			int
SFTPD	10	rs1983775	10	81663575	0.0655	0.076	1.44e-08	9.41e-09	-0.6156	-0.515	8.88e-16	unique			up
SFTPD	10	rs17885031	10	81696091	0.0651	0.0753333	1.44e-08	1.31e-08	-0.6156	-0.512	1.11e-15	unique			int
SFTPD	10	rs2256581	10	81685024	0.329	0.333333	0.00015	1.86e-11	0.2281	0.3256	4.66e-14	unique			int
SFTPD	10	rs17098169	10	81816134	0.0795	0.0913333	2.57e-07	3.92e-08	-0.5228	-0.4555	5.11e-14	LD-GWAS
SFTPD	10	rs3851050	10	81882370	0.408	0.384	4.74e-05	4.29e-10	0.232	0.2983	1.71e-13	GWAS	Chronic obstructive pulmonary disease-related biomarkers	23144326	up
SFTPD	10	rs728616	10	81847914	0.0793	0.0913333	9.11e-07	3.92e-08	-0.4946	-0.4555	1.73e-13	GWAS	Chronic obstructive pulmonary disease-related biomarkers	23144326	int
SFTPD	10	rs11201972	10	81932680	0.133	0.135333	5.37e-09	5.17e-05	-0.448	-0.2873	5.19e-12	LD-GWAS			5'
SFTPD	10	rs6585454	10	81940701	0.133	0.134667	5.37e-09	6.47e-05	-0.448	-0.2841	6.85e-12	LD-GWAS			5'
SFTPD	10	rs3862518	10	81917957	0.105	0.105333	2.02e-08	5.97e-05	-0.4793	-0.3211	1.76e-11	unique			int
SFTPD	10	rs9266629	6	31346822	0.204	0.218667	3.27e-06	3.23e-06	0.3124	0.2699	5.02e-11	GWAS	Chronic obstructive pulmonary disease-related biomarkers	23144326	up
SHBG	17	rs727428	17	7537792	0.424	0.416667	3.52e-06	1.95e-09	-0.2284	-0.258	3.8e-14	GWAS	Androgen levels; Sex hormone-binding globulin levels	22936694; 22675492	down
SHBG	17	rs1642762	17	7554772	0.419	0.407086	2.98e-05	3.22e-08	-0.2099	-0.2446	4.92e-12	unique			5'
SHBG	17	rs1799941	17	7533423	0.259	0.245333	0.000207	3.07e-09	0.206	0.289	5.32e-12	LD-GWAS			5'
SORT1	1	rs7528419	1	109817192	0.224	0.224667	8.09e-09	0.000299	0.3902	0.1921	6.5e-11	GWAS; LD-GWAS	Lipoprotein-associated phospholipase A2 activity and mass	22003152	3'
SORT1	1	rs646776	1	109818530	0.224	0.225333	8.09e-09	0.00042	0.3902	0.1874	1.01e-10	GWAS; LD-GWAS	Coronary heart disease; Progranulin levels; Response to statin therapy; Lipid metabolism phenotypes; Myocardial infarction (early onset); Cholesterol, total; LDL cholesterol	21378988; 21087763; 20339536; 19936222; 19198609; 19060911; 19060910; 18193044	down
SORT1	1	rs660240	1	109817838	0.216	0.216667	3.85e-08	0.000332	0.3756	0.1947	2.42e-10	GWAS; LD-GWAS	Cardiovascular disease risk factors; LDL cholesterol	21943158; 20864672	3'
SPINK1	5	rs6580502	5	147208043	0.396	0.414	2.32e-09	5.24e-09	0.3374	0.2504	3.97e-17	unique			int
SPINK1	5	rs930217	5	147190108	0.397	0.415333	1.27e-08	1.46e-08	0.3241	0.2411	1.11e-15	unique			inter
TNFRSF10C	8	rs4760	19	44153100	0.155	0.156667	1.08e-29	5.95e-33	-0.8636	-0.7659	3.86e-61	unique			mis
TNFRSF10C	8	rs10402946	19	44139182	0.277	0.266	1.66e-10	1.06e-12	-0.407	-0.3896	5.41e-22	unique			int
TNFRSF10C	8	rs304723	19	44102338	0.315	0.302667	1.06e-06	1.03e-06	-0.2881	-0.2503	5.44e-12	unique			int
TNFRSF10C	8	rs2240633	19	44128437	0.309	0.294393	7.66e-07	3.51e-06	-0.2908	-0.2424	1.47e-11	unique			int
TNFRSF10C	8	rs34637472	19	44126279	0.303	0.288667	1.35e-06	6.58e-06	-0.2855	-0.2366	4.78e-11	unique			up
VEGFA	6	rs7767396	6	43927050	0.468	0.469333	2.27e-12	5.13e-15	-0.3971	-0.3793	3.92e-26	LD-GWAS			inter
VEGFA	6	rs9472159	6	43919695	0.491	0.488	1.54e-10	8.73e-13	-0.3603	-0.3455	4.15e-22	LD-GWAS			inter
VEGFA	6	rs9472158	6	43918897	0.408	0.408	7.99e-07	1.56e-10	0.2892	0.3232	6.66e-16	unique			inter
VEGFA	6	rs9369434	6	43918407	0.419	0.417333	7.82e-07	5.65e-09	-0.2838	-0.2897	2.22e-14	unique			inter
VEGFA	6	rs729391	6	43917892	0.373	0.376667	4.55e-05	1.03e-09	0.2412	0.3103	3.51e-13	unique			inter
VEGFA	6	rs7764227	6	43913988	0.275	0.277333	1.1e-05	3.98e-08	0.2856	0.2968	2.13e-12	unique			inter
VWF	12	rs687289	9	136137106	0.347	0.312	5.08e-15	2.36e-22	0.441	0.4338	5.6e-36	GWAS; LD-GWAS	Urinary metabolites (H-NMR features); Coagulation factor levels	24586186; 23267103	int
VWF	12	rs657152	9	136139265	0.372	0.333111	2.07e-11	3.35e-21	0.3763	0.4166	5.43e-31	GWAS; LD-GWAS	Urinary metabolites (H-NMR features); Serum alkaline phosphatase levels; Thyroid hormone levels; Obesity-related traits; Phytosterol levels; Liver enzyme levels	24586186; 24094242; 23408906; 23251661; 20529992; 18940312	int
VWF	12	rs507666	9	136149399	0.2	0.176	7.58e-12	9.15e-16	0.4601	0.4607	2.38e-26	GWAS; LD-GWAS	Lipid traits; Soluble ICAM-1	24386095; 21533024; 18604267	int
VWF	12	rs579459	9	136154168	0.225	0.198667	7.69e-08	5.67e-13	0.3451	0.3996	1.64e-19	GWAS; LD-GWAS	Blood metabolite ratios; Urinary metabolites (H-NMR features); Coronary artery disease or ischemic stroke; Coronary artery disease or large artery stroke; Red blood cell traits; Liver enzyme levels (alkaline phosphatase); Coronary heart disease; Soluble levels of adhesion molecules; Soluble E-selectin levels	24816252; 24586186; 24262325; 24262325; 23222517; 22001757; 21378990; 20167578; 19729612	up
VWF	12	rs630014	9	136149722	0.474	0.492667	3.88e-06	2e-11	-0.2518	0.2822	6.66e-16	unique			int
VWF	12	rs633862	9	136155444	0.455	0.483333	7.23e-09	3.55e-08	-0.3173	-0.2357	1.78e-15	unique			up
VWF	12	rs8176682	9	136139297	0.385	0.393717	6.59e-05	1.14e-08	-0.2328	-0.2475	4.58e-12	unique			int
VWF	12	rs8176743	9	136131415	0.078	0.0787717	5.64e-06	3.64e-07	0.4546	0.3929	9.25e-12	GWAS; LD-GWAS	End-stage coagulation	23381943	mis
VWF	12	rs8176749	9	136131188	0.0781	0.0786667	5.64e-06	3.66e-07	0.4546	0.3926	9.29e-12	GWAS; LD-GWAS	Urinary metabolites (H-NMR features); Tumor biomarkers	24586186; 23300138	syn
VWF	12	rs8176746	9	136131322	0.0781	0.0786667	5.88e-06	3.66e-07	0.454	0.3926	9.67e-12	GWAS; LD-GWAS	Mean corpuscular hemoglobin concentration	20139978	mis
VWF	12	rs7857390	9	136128546	0.386	0.393333	4.06e-05	6.97e-08	-0.2383	-0.2338	1.41e-11	unique
VWF	12	rs4962153	9	136323754	0.158	0.150667	4.27e-06	4.79e-06	0.3478	0.2842	9.63e-11	GWAS	Liver enzyme levels	18940312	int
VWF	12	rs11244079	9	136184526	0.0609	0.062	5.98e-05	1.84e-06	0.4341	0.4156	4.59e-10	unique			up
	The table is sorted alphabetically by gene name and then sorted by "weighted meta-analysis P-value". Distant (trans) pQTLs are denoted by light tan shading. The pQTL with opposite directions between the two studies is highlighted in red. pQTLs determined by the tobit model are designated by an * next to the gene name. The NHGRI GWAS catalog was searched 5-8-2015; pQTLs are unique if they are not …
